# Supplementary material
Source: PubMed Central journal article supplement (PMC3069770)
Supplement: JCI44261sd.pdf [file JCI44261sd.pdf]

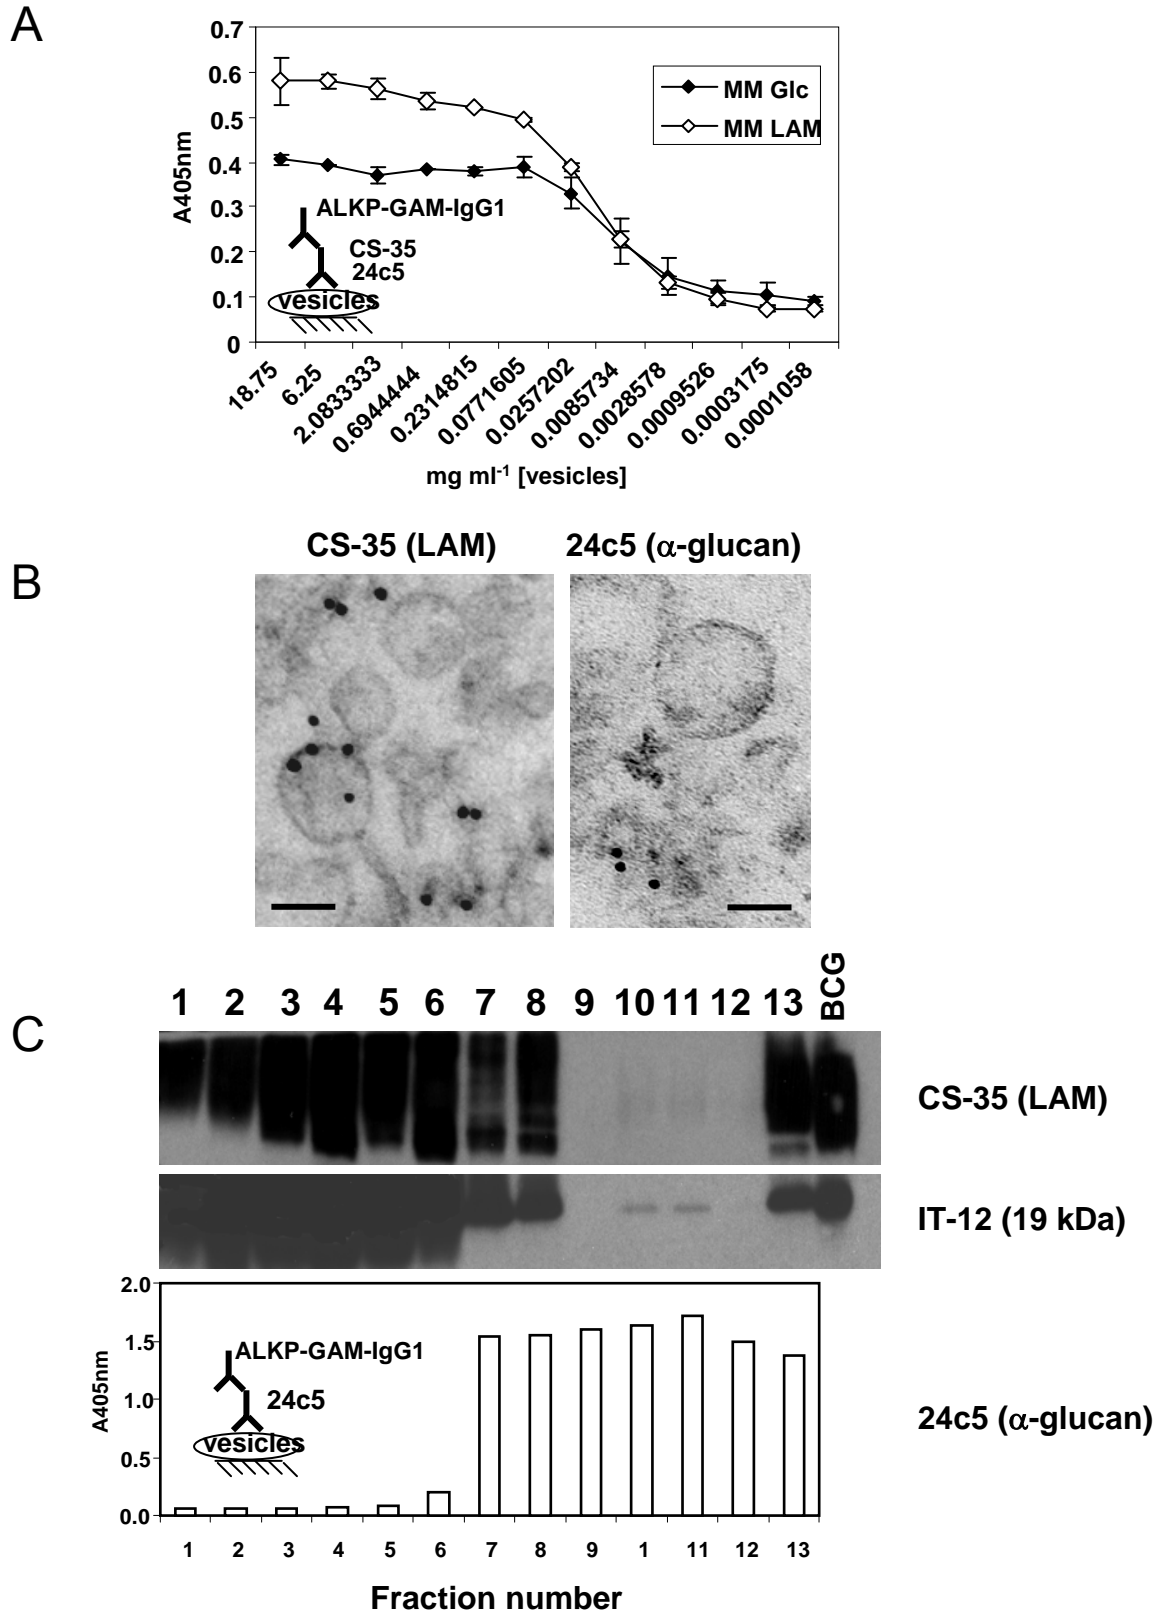

**Supplementary Figure 1.** Analysis of LAM and  $\alpha$ -glucan in vesicle preparations. (A) ELISA of BCG vesicles for LAM and  $\alpha$ -glucan, using the monoclonal antibodies CS-35 and 24c5 for LAM and  $\alpha$ -glucan, respectively. (B) Thin sections of BCG vesicles Immunolabeled for LAM and  $\alpha$ -glucan. Bar 100 nm. (C) Western blot analysis of the fractions of an Optiprep density gradient for LAM and  $\alpha$ -glucan.

## BCG Pasteur

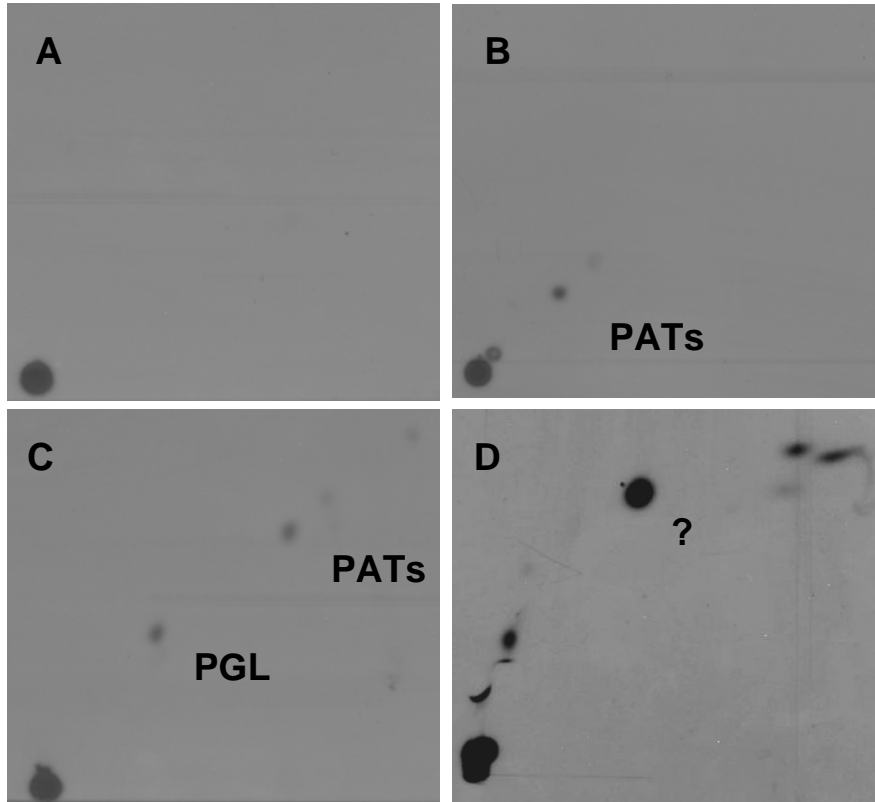

**Supplementary Figure 2. 2D-HPTLC analysis of apolar lipids of BCG and *M. tuberculosis* vesicles.** Total lipids of vesicles isolated from  $^{14}\text{C}$ -acetate-labeled cells were extracted with chloroform:methanol (2:1, vol/vol). Lipid extracts were separated by 2-D TLC by applying an amount of lipids corresponding to 10,000 DPM per TLC plate and by using the solvent systems A-D for separation of apolar lipids. PGL, phenolglycolipid; PAT, poly-acyltrehaloses

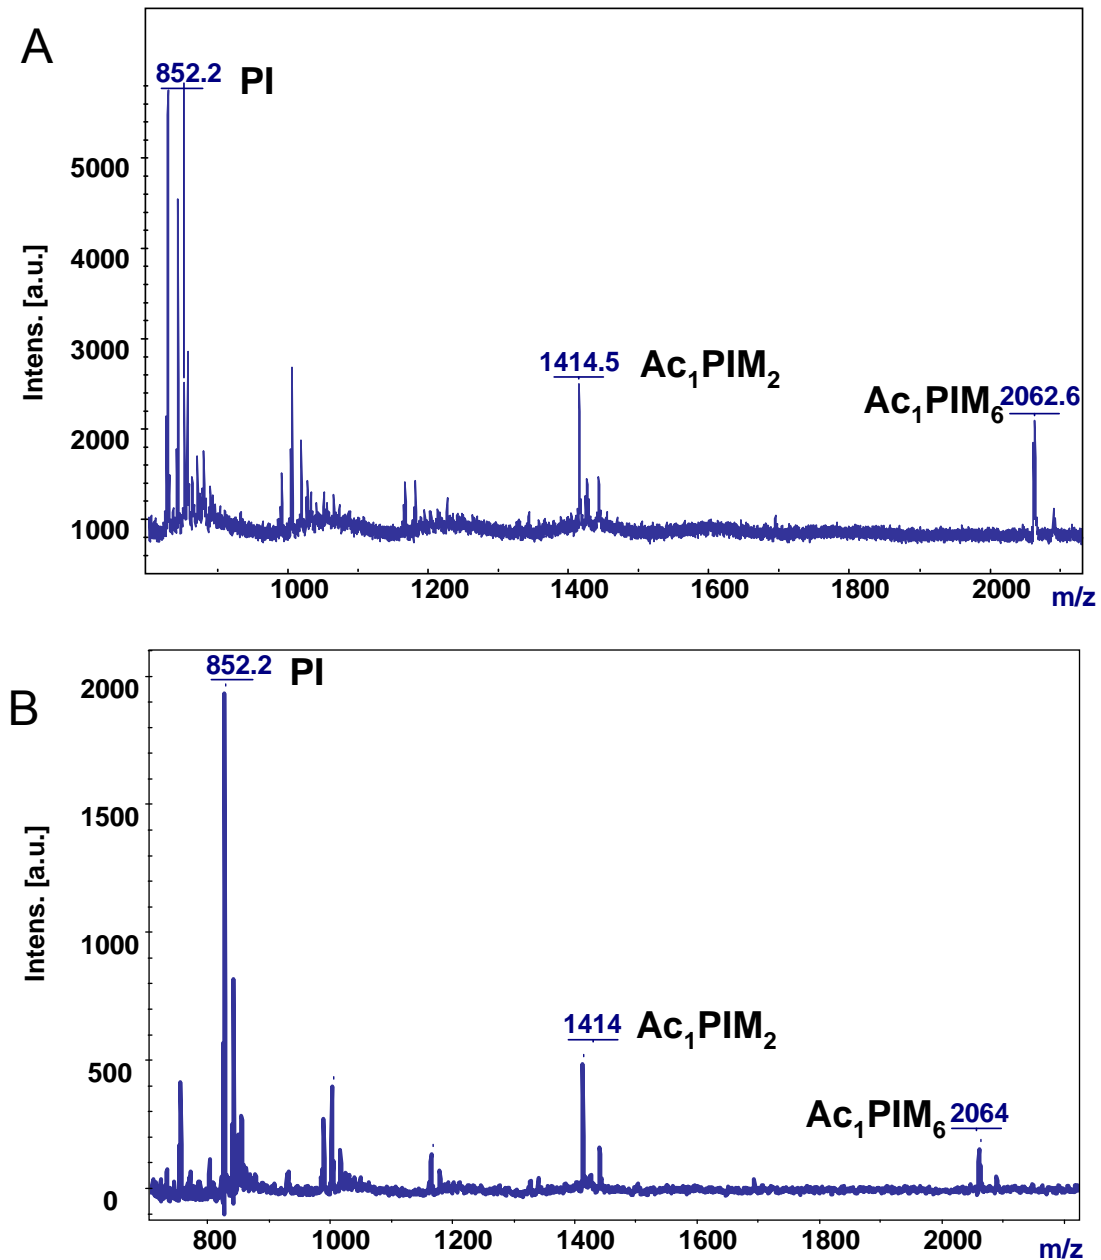

**Supplementary Figure 3. MALDI-TOF-MS of BCG and H37Rv vesicles for polar lipid analysis.** The various PIM species and their relative abundances were determined by matrix-assisted laser-desorption/ionization time of flight mass spectrometry in the negative mode.

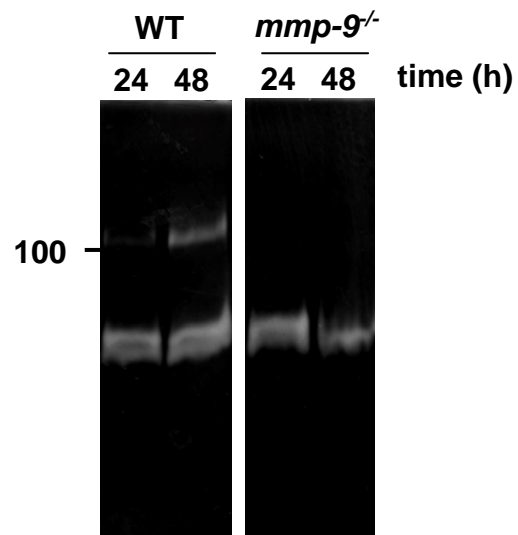

**Supplementary Figure 4. Validation of gelatinolytic activity of MMP-9.** The levels of MMP-9 activity in culture supernatants from macrophage treated with vesicles were analyzed by zymography after 24 and 48 h. The gelatinolytic activity corresponding to MMP-9 was absent in *mmp9* knockout isolated BMMs.

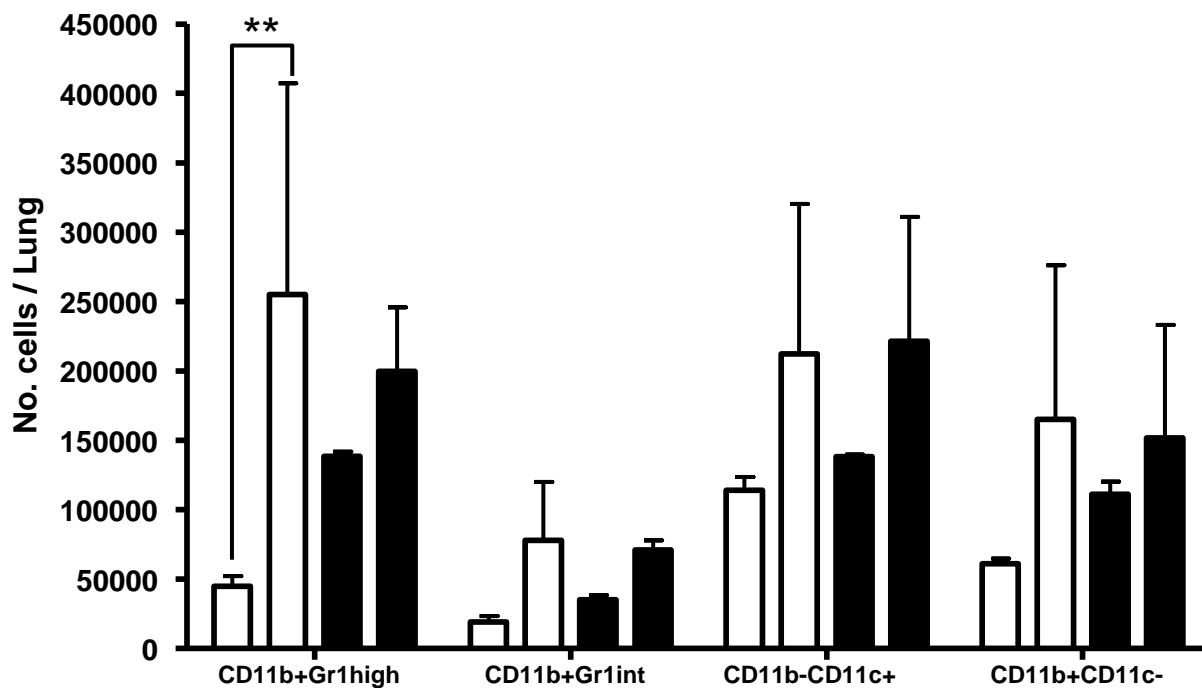

**Supplementary Figure 5. Myeloid cells in the lungs after 23 days.** Bar graphs indicate the mean absolute numbers of the different populations of lung cells of WT (open bars) and TLR2<sup>-/-</sup> (filled bars) after 23 days.

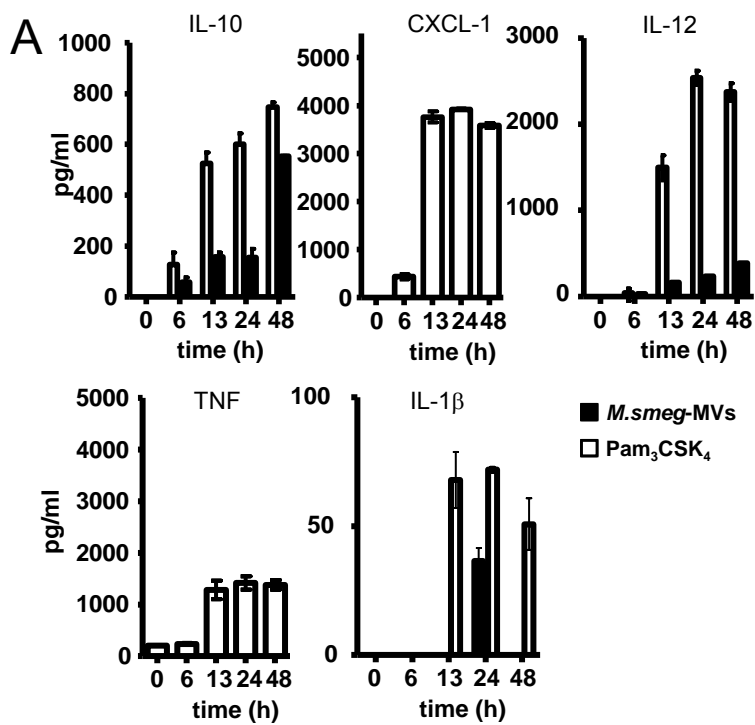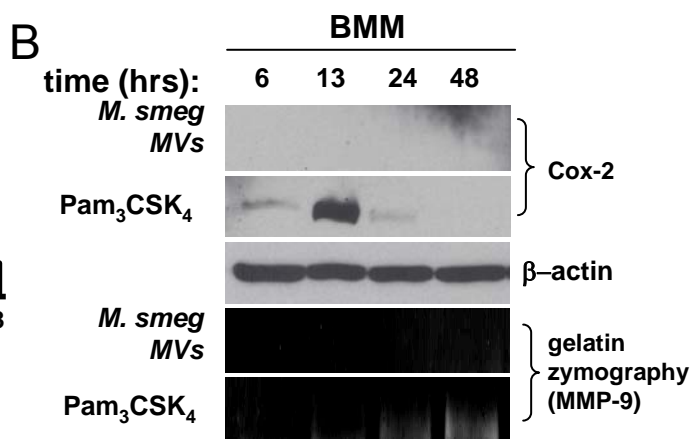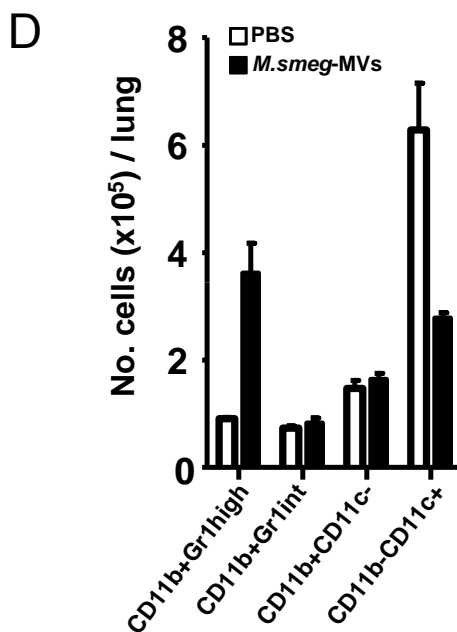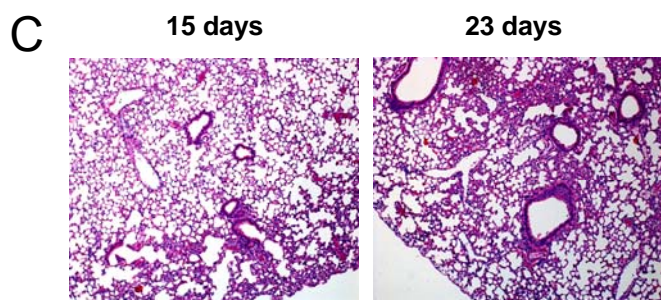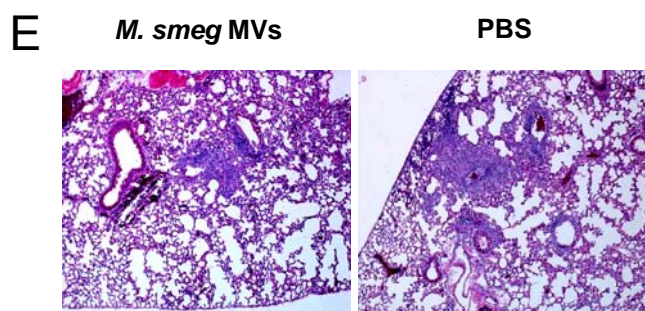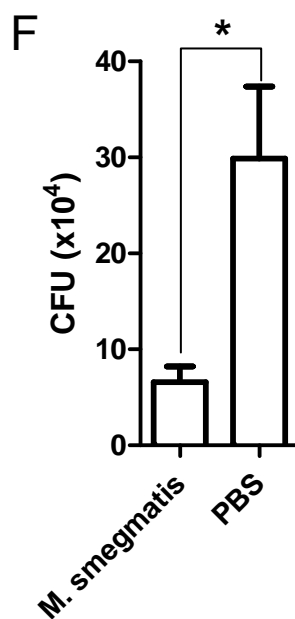

**Supplementary Figure 6. Analysis of the response to *M. smegmatis* MVs.** Freshly isolated BMM were stimulated with MVs and with Pam3CSK4 *in vitro* (500,000 cells/500  $\mu$ l of media). Macrophage supernatants and cell lysates were collected at time intervals ranging from 0 to 48 hours after stimulation (X-axes of all graphs indicate time in hours). (A) The supernatants of cultures *M. smegmatis* MVs (black bars) or Pam3CSK4 (white bars) -stimulated macrophages were assayed for cytokines including IL-1 $\beta$ , IL-10, IL-12p70, TNF- $\alpha$  and chemokine CXCL1 by multiplex ELISA (MSD Systems). Cytokines IL-6 and MIP-1a were analyzed by standard ELISA. (B) The levels of Cox-2 and MMP-9 were analyzed by Western blot and zymography, respectively. For Cox-2 analysis lysates were made from BMM cells and collected at the indicated times, ranging from 0 to 48 hours after addition Pam3CSK4 or *M. smegmatis* MVs. For measurement of MMP-9 activity, culture supernatants were collected at the indicated times following stimulation as shown. (C) Analysis of lung pathology in mouse lungs after injection of *M. smegmatis* MVs. Representative images of H&E stained lung sections of intratracheally vesicle treated WT C57BL/6 mice. Lungs were analyzed at 15 and 23 days after treatment. The images are representative of five lungs. The experiment was done twice. (D) Analysis of myeloid cells in the lungs following intratracheal injection of *M. smegmatis* MVs. Bar graphs indicating the mean absolute numbers of the different populations of lung cells of mice treated with PBS (white bars) or *M. smegmatis* MVs (black bars). (E) Representative images of H&E stained lung sections of WT C57BL/6 mice infused with *M. smegmatis* MVs or PBS and challenged with a low dose of H37Rv (50-100 CFUs). Lungs were analyzed at 30 days after the challenge. (F) Colony forming units in lungs of mice receiving the indicated treatments followed by Mtb H37Rv challenge. Analysis was done at day 30 after challenge. The experimental data is representative of two independent experiments.

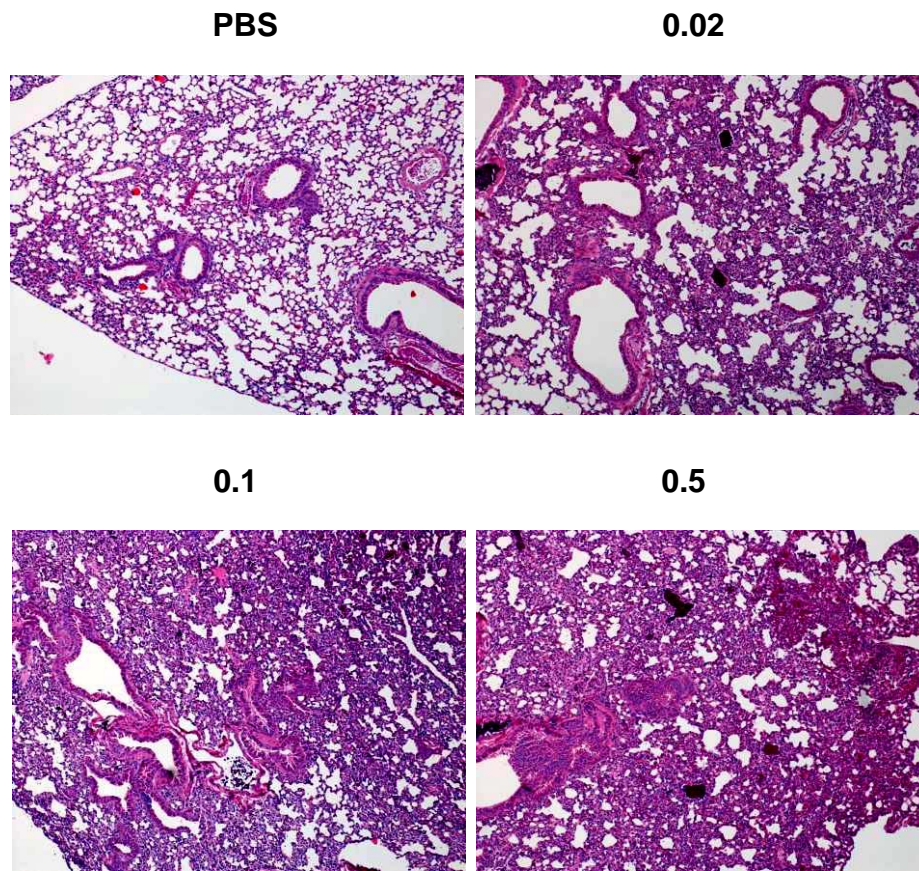

**Supplementary Figure 7. Dose dependent inflammatory response in the lungs after infusion of MVs.** Representative images of H&E stained lung sections of intratracheally vesicle treated WT C57BL/6 mice. Lungs were analyzed histologically at 15 days after treatment. The images are representative of five lungs. The experiment was done twice. The number indicates the dilution factor of the MV suspensions that were injected intratracheally.



**Supporting table 1. *M. bovis* BCG Pasteur vesicles-associated proteins**

| Accession number | Protein name                                               | Unique peptides <sup>a</sup> | Score <sup>b</sup> | TMD <sup>c</sup> | SP <sup>d</sup> | Functional category <sup>e</sup>        |
|------------------|------------------------------------------------------------|------------------------------|--------------------|------------------|-----------------|-----------------------------------------|
| gi 31792657      | ABC transporter ATP-binding protein                        | 3                            | 223                | +                | -               | cell wall and cell processes            |
| gi 31794087      | D-alanyl-D-alanine carboxypeptidase                        | 3                            | 85                 | -                | +               | cell wall and cell processes            |
| gi 31792982      | hypothetical protein Mb1822 putative ABC transporter       | 1                            | 68                 | +                | -               | cell wall and cell processes            |
| gi 31793701      | possible conserved membrane protein                        | 1                            | 73                 | +                | -               | cell wall and cell processes            |
| gi 31794764      | possible conserved membrane protein                        | 2                            | 122                | +                | -               | cell wall and cell processes            |
| gi 31794976      | hypothetical protein Mb3832c                               | 1                            | 125                | +                | -               | cell wall and cell processes            |
| gi 149974        | immunogenic protein MPB57                                  | 1                            | 60                 | -                | +               | cell wall and cell processes            |
| gi 31792158      | metal cation transporter P-type ATPase CtpV                | 2                            | 121                | +                | -               | cell wall and cell processes            |
| gi 31792544      | phosphate ABC transporter, phosphate-binding protein       | 2                            | 96                 | +                | -               | cell wall and cell processes            |
| gi 31792229      | putative ESAT-6 like protein ESXI (ESAT-6 like protein 1)  | 3                            | 299                | -                | -               | cell wall and cell processes            |
| gi 121639584     | putative membrane-associated serine protease               | 2                            | 209                | -                | +               | cell wall and cell processes            |
| gi 31794055      | soluble secreted antigen MPB53 precursor                   | 1                            | 57                 | -                | +               | cell wall and cell processes            |
| gi 31794066      | 30S ribosomal protein S2                                   | 7                            | 501                | -                | -               | information pathways                    |
| gi 31791892      | 30S ribosomal protein S3                                   | 3                            | 215                | -                | -               | information pathways                    |
| gi 31794634      | 30S ribosomal protein S4                                   | 5                            | 324                | -                | -               | information pathways                    |
| gi 31791869      | elongation factor Tu                                       | 9                            | 566                | -                | -               | information pathways                    |
| gi 61224549      | alpha-amylase family protein                               | 2                            | 230                | -                | -               | intermediary metabolism and respiration |
| gi 31793066      | bacterioferritin                                           | 6                            | 337                | -                | -               | intermediary metabolism and respiration |
| gi 31795015      | bacterioferritin BfrB                                      | 5                            | 420                | -                | -               | intermediary metabolism and respiration |
| gi 31793702      | bacterioferritin comigratory protein BCP                   | 1                            | 85                 | -                | -               | intermediary metabolism and respiration |
| gi 31793400      | glutamine synthetase GLNA1 (glutamine synthase) (GS-I)     | 21                           | 911                | -                | -               | intermediary metabolism and respiration |
| gi 31794841      | membrane-associated serine protease                        | 3                            | 133                | +                | -               | intermediary metabolism and respiration |
| gi 121635956     | myo-inositol-1-phosphate synthase INO1                     | 1                            | 67                 | -                | -               | intermediary metabolism and respiration |
| gi 31794220      | phosphoserine phosphatase                                  | 2                            | 55                 | +                | -               | intermediary metabolism and respiration |
| gi 31791708      | thioredoxin protein                                        | 1                            | 66                 | -                | +               | intermediary metabolism and respiration |
| gi 31794453      | transmembrane carbonic anhydrase                           | 1                            | 69                 | +                | -               | intermediary metabolism and respiration |
| gi 31794978      | secreted antigen 85-A FBPA (fibronectin-binding protein A) | 3                            | 119                | -                | -               | lipid metabolism                        |
| gi 121637790     | secreted antigen 85-B                                      | 2                            | 114                | -                | -               | lipid metabolism                        |
| gi 31792330      | acetyl-CoA acetyltransferase                               | 2                            | 164                | -                | -               | lipid metabolism                        |
| gi 31792287      | acyl-[acyl-carrier protein] desaturase                     | 2                            | 177                | -                | -               | lipid metabolism                        |
| gi 31792542      | acyl-CoA dehydrogenase                                     | 2                            | 147                | -                | -               | lipid metabolism                        |
| gi 31791332      | acyl-CoA dehydrogenase FADE2                               | 1                            | 74                 | -                | -               | lipid metabolism                        |
| gi 31794454      | acyl-CoA dehydrogenase FADE25                              | 1                            | 55                 | -                | -               | lipid metabolism                        |
| gi 31791393      | acyl-CoA dehydrogenase FADE3                               | 1                            | 78                 | -                | -               | lipid metabolism                        |
| gi 31791408      | acyl-CoA dehydrogenase FADE4                               | 6                            | 335                | -                | -               | lipid metabolism                        |
| gi 31791422      | acyl-CoA dehydrogenase fadE5                               | 6                            | 365                | -                | -               | lipid metabolism                        |

|              |                                                      |    |     |   |   |                                       |
|--------------|------------------------------------------------------|----|-----|---|---|---------------------------------------|
| gi 31791576  | acyl-CoA dehydrogenase FADE7                         | 2  | 145 | - | - | lipid metabolism                      |
| gi 224992213 | acyl-CoA synthetase                                  | 5  | 237 | + | - | lipid metabolism                      |
| gi 31793705  | fatty acid synthase                                  | 4  | 248 | - | - | lipid metabolism                      |
| gi 31792048  | fatty oxidation protein fadB                         | 5  | 298 | - | - | lipid metabolism                      |
| gi 31793810  | cytoplasmic protein, 35 kDa                          | 2  | 236 | - | - | unknown                               |
| gi 31791294  | possible conserved membrane protein                  | 1  | 66  | + | - | unknown                               |
| gi 31791987  | hypothetical protein Mb0822c                         | 3  | 120 | - | + | unknown                               |
| gi 31792157  | hypothetical protein Mb0993                          | 2  | 146 | - | + | unknown                               |
| gi 31793706  | hypothetical protein Mb2554c                         | 1  | 125 | - | + | unknown                               |
| gi 31794889  | putative secreted protein                            | 3  | 220 | - | + | unknown                               |
| gi 31794904  | hypothetical protein Mb3759                          | 1  | 66  | + | + | unknown                               |
| gi 224989193 | 29 kDa antigen                                       | 11 | 728 | - | - | Virulence, detoxification, adaptation |
| gi 620092    | catalase                                             | 3  | 150 | - | - | Virulence, detoxification, adaptation |
| gi 31791618  | chaperonin GroEL                                     | 5  | 305 | - | + | Virulence, detoxification, adaptation |
| gi 31793477  | heat shock protein 90                                | 2  | 115 | - | - | Virulence, detoxification, adaptation |
| gi 31792746  | hypothetical protein Mb1587 similar to VapC 11 toxin | 1  | 56  | - | - | Virulence, detoxification, adaptation |
| gi 31791528  | molecular chaperone DnaK                             | 2  | 122 | - | - | Virulence, detoxification, adaptation |

a, Proteins identified with only one peptide were inspected manually

b, Cut-off values for Mascot scores of peptides and proteins were set to 45 ( $p < 0.05$ ) and 51 ( $p < 0.01$ ), respectively, for considering them as being accurate identifications

c, Prediction of Transmembrane domains with TMHMM v2.0 (<http://www.cbs.dtu.dk/services/TMHMM>)

d, Prediction of signal peptide with SignalP v3.0 (<http://www.cbs.dtu.dk/services/SignalP>)

e, Functional category as in Tuberculist v2.3 (<http://tuberculist.epfl.ch>)

**Supporting table 2. *M. tuberculosis* H37Rv vesicles-associated proteins**

| Accession number | Protein name                                                   | Mw (kDa) | unique peptides <sup>a</sup> | Score <sup>b</sup> | TMD <sup>c</sup> | SP <sup>d</sup> | Functional category <sup>e</sup>        |
|------------------|----------------------------------------------------------------|----------|------------------------------|--------------------|------------------|-----------------|-----------------------------------------|
| gi 82408083      | Putative Penicillin-Binding Protein Homolog                    | 28.5     | 3                            | 123                | -                | +               | cell wall and cell processes            |
| gi 15609121      | cutinase precursor CFP21                                       | 22       | 1                            | 104                | -                | +               | cell wall and cell processes            |
| gi 15842454      | D-alanyl-D-alanine carboxypeptidase                            | 30       | 3                            | 164                | -                | +               | cell wall and cell processes            |
| gi 7476904       | hypothetical protein Rv1792, putative ESAT-6 like protein EsxM | 11       | 3                            | 128                | -                | -               | cell wall and cell processes            |
| gi 15610173      | hypothetical protein Rv3036c, probable secreted protein MPT64  | 24.6     | 3                            | 133                | -                | +               | cell wall and cell processes            |
| gi 15610752      | Esx-1 secretion-associated protein A, EspA                     | 40       | 2                            | 187                | -                | -               | cell wall and cell processes            |
| gi 15609063      | immunogenic protein MPT63 (antigen MPT63/MPB63)                | 16.5     | 2                            | 79                 | -                | +               | cell wall and cell processes            |
| gi 15609117      | immunogenic protein MPT64 (antigen MPT64/MPB64)                | 25.1     | 1                            | 67                 | -                | +               | cell wall and cell processes            |
| gi 15213986      | iron-regulated heparin binding hemagglutinin hbhA (adhesin)    | 21.5     | 1                            | 67                 | -                | -               | cell wall and cell processes            |
| gi 15840357      | phosphate ABC transporter, phosphate-binding protein           | 38.4     | 5                            | 256                | +                | -               | cell wall and cell processes            |
| gi 15609483      | putative ESAT-6 like protein ESXO (ESAT-6 like protein 6)      | 10       | 2                            | 108                | -                | -               | cell wall and cell processes            |
| gi 15610015      | soluble secreted antigen MPT53 precursor                       | 18.5     | 1                            | 81                 | -                | +               | cell wall and cell processes            |
| gi 15611010      | 10 kDa culture filtrate antigen EsxB                           | 10.8     | 4                            | 306                | -                | -               | cell wall and cell processes            |
| gi 15610594      | 30S ribosomal protein S4                                       | 15.5     | 3                            | 175                | -                | -               | information pathways                    |
| gi 15607850      | 30S ribosomal protein S17                                      | 14.8     | 2                            | 104                | -                | -               | information pathways                    |
| gi 15607847      | 30S ribosomal protein S3                                       | 30.1     | 6                            | 241                | -                | -               | information pathways                    |
| gi 15607861      | 30S ribosomal protein S5                                       | 22.9     | 3                            | 104                | -                | -               | information pathways                    |
| gi 15607825      | elongation factor Tu                                           | 44.4     | 3                            | 203                | -                | -               | information pathways                    |
| gi 15840782      | alpha-amylase family protein 1                                 | 83.2     | 2                            | 150                | -                | -               | intermediary metabolism and respiration |
| gi 15609013      | bacterioferritin                                               | 18.4     | 3                            | 122                | -                | -               | intermediary metabolism and respiration |
| gi 15610977      | bacterioferritin BfrB                                          | 20.4     | 4                            | 160                | -                | -               | intermediary metabolism and respiration |
| gi 15841312      | beta-1,3-glucanase precursor                                   | 32.3     | 1                            | 58                 | -                | +               | intermediary metabolism and respiration |
| gi 15609357      | glutamine synthetase GLNA1 (glutamine synthase) (GS-I)         | 53.7     | 14                           | 677                | -                | -               | intermediary metabolism and respiration |
| gi 15610807      | membrane-associated serine protease                            | 40.8     | 4                            | 299                | +                | -               | intermediary metabolism and respiration |
| gi 167967754     | putative beta-glucanase                                        | 31       | 2                            | 109                | -                | +               | intermediary metabolism and respiration |
| gi 15841792      | serine esterase                                                | 22.8     | 2                            | 117                | -                | -               | intermediary metabolism and respiration |
| gi 15607267      | serine protease PepA                                           | 34.9     | 1                            | 71                 | -                | +               | intermediary metabolism and respiration |
| gi 48828         | antigen 85-C                                                   | 36.8     | 2                            | 166                | -                | -               | lipid metabolism                        |
| gi 15610940      | secreted antigen 85-A FBPA (Mycolyl transferase 85A)           | 35.8     | 3                            | 171                | -                | +               | lipid metabolism                        |
| gi 15842284      | cytoplasmic protein, 35 kDa                                    | 29.2     | 1                            | 54                 | -                | -               | unknown                                 |
| gi 15607939      | hypothetical protein Rv0799c                                   | 36.1     | 2                            | 96                 | +                | -               | unknown                                 |
| gi 15607971      | hypothetical protein Rv0831c                                   | 30.2     | 4                            | 213                | -                | -               | unknown                                 |
| gi 15609760      | hypothetical protein Rv2623                                    | 31.7     | 1                            | 69                 | -                | -               | unknown                                 |
| gi 15610305      | hypothetical protein Rv3169                                    | 41.9     | 1                            | 95                 | -                | -               | unknown                                 |
| gi 15610708      | hypothetical protein Rv3572                                    | 19       | 2                            | 60                 | -                | +               | unknown                                 |
| gi 15610853      | hypothetical protein Rv3717                                    | 24.9     | 2                            | 96                 | -                | +               | unknown                                 |
| gi 15841951      | PPE family protein                                             | 39.4     | 1                            | 75                 | -                | +               | unknown                                 |

|             |                                                      |      |   |     |   |   |                                       |
|-------------|------------------------------------------------------|------|---|-----|---|---|---------------------------------------|
| gj 2190473  | 29 kDa antigen                                       | 28.9 | 4 | 233 | - | - | virulence, detoxification, adaptation |
| gj 488436   | catalase                                             | 80.7 | 6 | 365 | - | - | virulence, detoxification, adaptation |
| gj 15607581 | chaperonin GroEL                                     | 56.7 | 8 | 497 | - | + | virulence, detoxification, adaptation |
| gj 44588    | DnaK                                                 | 65.7 | 1 | 75  | - | - | virulence, detoxification, adaptation |
| gj 15609168 | heat shock protein hspX                              | 16.1 | 2 | 169 | - | - | virulence, detoxification, adaptation |
| gj 15608535 | hypothetical protein Rv1397c similar to VapC10 toxin | 14.9 | 1 | 67  | - | - | virulence, detoxification, adaptation |

a, Proteins identified with only one peptide were inspected manually

b, Cut-off values for Mascot scores of peptides and proteins were set to 45 ( $p < 0.05$ ) and 51 ( $p < 0.01$ ), respectively, for considering them as being accurate identifications

c, Prediction of Transmembrane domains with TMHMM v2.0 (<http://www.cbs.dtu.dk/services/TMHMM>)

d, Prediction of signal peptide with SignalP v3.0 (<http://www.cbs.dtu.dk/services/SignalP>)

e, Functional category as in Tuberculist v2.3 (<http://tuberculist.epfl.ch>)

**Supporting table 3. *M. smegmatis* vesicles-associated proteins**

| Accession number | Protein name                                     | Unique peptides <sup>a</sup> | Score <sup>b</sup> | TMD <sup>c</sup> | SP <sup>d</sup> | Functional category <sup>e</sup>        |
|------------------|--------------------------------------------------|------------------------------|--------------------|------------------|-----------------|-----------------------------------------|
| gij118468477     | ribosomal protein S9                             | 1132                         | 35                 | -                | -               | information pathways                    |
| gij118472053     | 30S ribosomal protein S7                         | 796                          | 32                 | -                | -               | information pathways                    |
| gij118473160     | 30S ribosomal protein S3                         | 699                          | 33                 | -                | -               | information pathways                    |
| gij118468301     | 30S ribosomal protein S4                         | 673                          | 24                 | -                | -               | information pathways                    |
| gij118472263     | 50S ribosomal protein L2                         | 660                          | 28                 | -                | -               | information pathways                    |
| gij118473190     | 50S ribosomal protein L3                         | 631                          | 19                 | -                | -               | information pathways                    |
| gij118467618     | 30S ribosomal protein S16                        | 603                          | 14                 | -                | -               | information pathways                    |
| gij118469641     | 30S ribosomal protein S5                         | 540                          | 22                 | -                | -               | information pathways                    |
| gij118468304     | 50S ribosomal protein L23                        | 389                          | 9                  | -                | -               | information pathways                    |
| gij118470088     | 50S ribosomal protein L4                         | 378                          | 12                 | -                | -               | information pathways                    |
| gij118470225     | ribosomal protein L14                            | 353                          | 10                 | -                | -               | information pathways                    |
| gij118471474     | 50S ribosomal protein L27                        | 264                          | 8                  | -                | -               | information pathways                    |
| gij118469072     | 50S ribosomal protein L32                        | 245                          | 4                  | -                | -               | information pathways                    |
| gij118471088     | elongation factor Tu                             | 154                          | 4                  | -                | -               | information pathways                    |
| gij118472813     | 30S ribosomal protein S1                         | 95                           | 2                  | -                | -               | information pathways                    |
| gij118469435     | single-strand DNA-binding protein                | 74                           | 5                  | -                | -               | information pathways                    |
| gij118471339     | DNA-binding protein HU                           | 69                           | 2                  | -                | -               | information pathways                    |
| gij118471079     | transcriptional regulator, TetR family protein   | 36                           | 5                  | -                | -               | information pathways                    |
| gij118470803     | extra cytoplasmic sigma factor                   | 31                           | 3                  | -                | -               | information pathways                    |
| gij118469501     | serine/threonine-protein kinase PknD             | 27                           | 2                  | +                | -               | information pathways                    |
| gij118470693     | Formyl transferase                               | 42                           | 7                  | -                | -               | information pathways                    |
| gij118473437     | 50S ribosomal protein L33                        | 84                           | 4                  | -                | -               | information pathways                    |
| gij118467956     | glutamine synthetase, type I                     | 539                          | 16                 | -                | -               | intermediary metabolism and respiration |
| gij118472596     | dihydrolipoamide dehydrogenase                   | 463                          | 9                  | -                | -               | intermediary metabolism and respiration |
| gij118467799     | glyceraldehyde-3-phosphate dehydrogenase, type I | 311                          | 10                 | -                | -               | intermediary metabolism and respiration |
| gij118471656     | alcohol dehydrogenase, iron-containing           | 235                          | 8                  | -                | -               | intermediary metabolism and respiration |
| gij118468145     | bacterioferritin                                 | 170                          | 9                  | -                | -               | intermediary metabolism and respiration |
| gij118467432     | isocitrate dehydrogenase, NADP-dependent         | 98                           | 8                  | -                | -               | intermediary metabolism and respiration |
| gij118468051     | proteasome beta subunit                          | 44                           | 3                  | -                | -               | intermediary metabolism and respiration |
| gij118469436     | serine protease                                  | 43                           | 4                  | -                | +               | intermediary metabolism and respiration |
| gij118467514     | isochorismate synthase Dhbc                      | 34                           | 4                  | -                | -               | intermediary metabolism and respiration |
| gij118471065     | ribulokinase                                     | 31                           | 3                  | -                | -               | intermediary metabolism and respiration |
| gij118471101     | glycosyltransferase                              | 30                           | 10                 | -                | -               | intermediary metabolism and respiration |
| gij118471116     | chitooligosaccharide deacetylase                 | 29                           | 4                  | -                | -               | intermediary metabolism and respiration |
| gij118471831     | short chain dehydrogenase                        | 29                           | 3                  | -                | -               | intermediary metabolism and respiration |
| gij118468744     | antigen 85-A                                     | 398                          | 9                  | -                | -               | lipid metabolism                        |
| gij118467737     | antigen 85-C                                     | 278                          | 7                  | -                | -               | lipid metabolism                        |

|              |                                                        |     |    |   |   |                                       |
|--------------|--------------------------------------------------------|-----|----|---|---|---------------------------------------|
| gij118469108 | acetyl-/propionyl-coenzyme A carboxylase alpha chain   | 269 | 15 | - | - | lipid metabolism                      |
| gij118470265 | 29 kDa antigen Cfp29                                   | 630 | 19 | - | + | Virulence, detoxification, adaptation |
| gij118469216 | chaperonin GroEL                                       | 293 | 19 | - | + | Virulence, detoxification, adaptation |
| gij118470273 | low molecular weight antigen MTB12                     | 111 | 4  | - | + | Virulence, detoxification, adaptation |
| gij118468785 | virulence factor mce family protein                    | 42  | 4  | + | + | Virulence, detoxification, adaptation |
| gij118471849 | FOF1 ATP synthase subunit beta                         | 88  | 5  | + | - | cell wall and cell processes          |
| gij118471254 | porin                                                  | 73  | 3  | + | - | cell wall and cell processes          |
| gij118471370 | putative cell division protein FtsQ                    | 28  | 7  | + | - | cell wall and cell processes          |
| gij118473261 | ABC-type transport system ATP-binding protein I        | 27  | 2  | - | - | cell wall and cell processes          |
| gij118469684 | ribose transport system permease protein RbsC          | 20  | 2  | + | + | cell wall and cell processes          |
| gij118470974 | hypothetical protein MSMEG_1629                        | 170 | 10 | - | - | unknown                               |
| gij118473120 | secreted protein                                       | 119 | 6  | - | + | unknown                               |
| gij118471597 | hypothetical protein MSMEG_1076                        | 82  | 4  | - | - | unknown                               |
| gij118469044 | hypothetical protein MSMEG_1279                        | 72  | 3  | - | - | unknown                               |
| gij118468070 | hypothetical protein MSMEG_5309                        | 40  | 2  | - | - | unknown                               |
| gij118467463 | D-ribose-binding periplasmic protein RbsB              | 34  | 1  | - | - | unknown                               |
| gij118469415 | hypothetical protein MSMEG_1475                        | 34  | 2  | - | - | unknown                               |
| gij118473366 | signal recognition particle-docking protein FtsY       | 32  | 4  | - | + | unknown                               |
| gij118468379 | hypothetical protein MSMEG_0256                        | 29  | 4  | - | - | unknown                               |
| gij118470619 | hypothetical protein MSMEG_2634                        | 29  | 3  | - | + | unknown                               |
| gij118470335 | extracellular solute-binding protein, family protein 5 | 28  | 7  | - | + | unknown                               |
| gij118470876 | hypothetical protein MSMEG_1891                        | 28  | 2  | - | - | unknown                               |
| gij118467440 | sensory box/response regulator                         | 28  | 10 | - | - | unknown                               |
| gij118473828 | hypothetical protein MSMEG_4456                        | 27  | 2  | - | - | unknown                               |
| gij118471995 | hypothetical protein MSMEG_0926                        | 27  | 3  | - | - | unknown                               |
| gij118467409 | hypothetical protein MSMEG_1384                        | 27  | 2  | - | - | unknown                               |
| gij118468774 | hypothetical protein MSMEG_4729                        | 24  | 2  | - | - | unknown                               |

a, Proteins identified with only one peptide were inspected manually

b, Cut-off values for Mascot scores of peptides and proteins were set to 45 ( $p < 0.05$ ) and 51 ( $p < 0.01$ ), respectively, for considering them as being accurate identifications

c, Prediction of Transmembrane domains with TMHMM v2.0 (<http://www.cbs.dtu.dk/services/TMHMM>)

d, Prediction of signal peptide with SignalP v3.0 (<http://www.cbs.dtu.dk/services/SignalP>)

e, Functional category as in Smegmalist v1.0 (<http://mycobrowser.epfl.ch/smegmalist.html>)

**Supporting Table 4. *M. bovis* BCG Pasteur cellular proteins**

| Accession number | Protein name                                                                                                             | Score | Unique peptides |
|------------------|--------------------------------------------------------------------------------------------------------------------------|-------|-----------------|
| gij121636354     | chaperonin GroEL [Mycobacterium bovis BCG str. Pasteur 1173P2]                                                           | 11375 | 252             |
| gij121639343     | co-chaperonin GroES [Mycobacterium bovis BCG str. Pasteur 1173P2]                                                        | 3840  | 96              |
| gij121636264     | molecular chaperone DnaK [Mycobacterium bovis BCG str. Pasteur 1173P2]                                                   | 2962  | 106             |
| gij121636589     | DNA-directed RNA polymerase subunit beta~ [Mycobacterium bovis BCG str. Pasteur 1173P2]                                  | 2550  | 85              |
| gij121636606     | elongation factor Tu [Mycobacterium bovis BCG str. Pasteur 1173P2]                                                       | 2197  | 71              |
| gij121639342     | chaperonin GroEL [Mycobacterium bovis BCG str. Pasteur 1173P2]                                                           | 2106  | 67              |
| gij121636588     | DNA-directed RNA polymerase subunit beta [Mycobacterium bovis BCG str. Pasteur 1173P2]                                   | 1860  | 83              |
| gij121637814     | catalase-peroxidase-peroxynitritase T katG [Mycobacterium bovis BCG str. Pasteur 1173P2]                                 | 1634  | 57              |
| gij121638822     | putative multifunctional mycocerosic acid synthase membrane-associated mas [Mycobacterium bovis BCG str. Pasteur 1173P2] | 1544  | 72              |
| gij121637065     | 5-methyltetrahydropteroyltriglutamate--homocysteine S-methyltransferase [Mycobacterium bovis BCG str. Pasteur 1173P2]    | 1368  | 50              |
| gij121639162     | putative transmembrane carbonic anhydrase [Mycobacterium bovis BCG str. Pasteur 1173P2]                                  | 1266  | 34              |
| gij121636597     | putative transmembrane transport protein mmpL5 [Mycobacterium bovis BCG str. Pasteur 1173P2]                             | 1108  | 34              |
| gij121636297     | putative endopeptidase ATP binding protein (chain b) clpB [Mycobacterium bovis BCG str. Pasteur 1173P2]                  | 1095  | 58              |
| gij121637406     | aconitate hydratase [Mycobacterium bovis BCG str. Pasteur 1173P2]                                                        | 1083  | 41              |
| gij121637239     | F0F1 ATP synthase subunit beta [Mycobacterium bovis BCG str. Pasteur 1173P2]                                             | 992   | 36              |
| gij121637821     | putative isocitrate lyase aceA [Mycobacterium bovis BCG str. Pasteur 1173P2]                                             | 967   | 45              |
| gij121639516     | putative ATP-dependent Clp protease ATP-binding subunit clpC [Mycobacterium bovis BCG str. Pasteur 1173P2]               | 955   | 56              |
| gij121639137     | S-adenosyl-L-homocysteine hydrolase [Mycobacterium bovis BCG str. Pasteur 1173P2]                                        | 950   | 39              |
| gij121638663     | polynucleotide phosphorylase/polyadenylase [Mycobacterium bovis BCG str. Pasteur 1173P2]                                 | 875   | 32              |
| gij121636155     | 3-ketoacyl-(acyl-carrier-protein) reductase [Mycobacterium bovis BCG str. Pasteur 1173P2]                                | 799   | 22              |
| gij121638126     | acyl carrier protein [Mycobacterium bovis BCG str. Pasteur 1173P2]                                                       | 785   | 16              |
| gij121636605     | elongation factor G [Mycobacterium bovis BCG str. Pasteur 1173P2]                                                        | 780   | 31              |
| gij121638911     | putative electron transfer flavoprotein (alpha-subunit) fixB [Mycobacterium bovis BCG str. Pasteur 1173P2]               | 760   | 15              |
| gij121637537     | 30S ribosomal protein S1 [Mycobacterium bovis BCG str. Pasteur 1173P2]                                                   | 715   | 39              |
| gij121638344     | ATP-dependent Clp protease proteolytic subunit [Mycobacterium bovis BCG str. Pasteur 1173P2]                             | 712   | 12              |
| gij121638359     | putative NAD-dependent glutamate dehydrogenase gdh [Mycobacterium bovis BCG str. Pasteur 1173P2]                         | 711   | 47              |
| gij121636164     | heat shock protein hsp [Mycobacterium bovis BCG str. Pasteur 1173P2]                                                     | 706   | 21              |
| gij121638102     | glutamine synthetase glnA1 [Mycobacterium bovis BCG str. Pasteur 1173P2]                                                 | 702   | 19              |
| gij121636156     | acetyl-CoA acetyltransferase [Mycobacterium bovis BCG str. Pasteur 1173P2]                                               | 689   | 15              |
| gij121637237     | F0F1 ATP synthase subunit alpha [Mycobacterium bovis BCG str. Pasteur 1173P2]                                            | 675   | 37              |
| gij121636060     | putative short-chain type dehydrogenase/reductase [Mycobacterium bovis BCG str. Pasteur 1173P2]                          | 643   | 15              |
| gij121638622     | hypothetical protein BCG_2760c [Mycobacterium bovis BCG str. Pasteur 1173P2]                                             | 632   | 17              |
| gij121636001     | hypothetical protein BCG_0121 [Mycobacterium bovis BCG str. Pasteur 1173P2]                                              | 614   | 17              |
| gij121637543     | hypothetical protein BCG_1674 [Mycobacterium bovis BCG str. Pasteur 1173P2]                                              | 583   | 20              |
| gij121636161     | succinate dehydrogenase flavoprotein subunit [Mycobacterium bovis BCG str. Pasteur 1173P2]                               | 569   | 30              |
| gij121636276     | fructose-bisphosphate aldolase [Mycobacterium bovis BCG str. Pasteur 1173P2]                                             | 559   | 15              |
| gij121638077     | putative ubiquinol-cytochrome C reductase QcrB (cytochrome B subunit) [Mycobacterium bovis BCG str. Pasteur 1173P2]      | 547   | 13              |

|              |                                                                                                                  |     |    |
|--------------|------------------------------------------------------------------------------------------------------------------|-----|----|
| gij121639112 | short chain dehydrogenase [Mycobacterium bovis BCG str. Pasteur 1173P2]                                          | 514 | 14 |
| gij121637740 | malate synthase G [Mycobacterium bovis BCG str. Pasteur 1173P2]                                                  | 512 | 23 |
| gij121639129 | preprotein translocase subunit SecA [Mycobacterium bovis BCG str. Pasteur 1173P2]                                | 510 | 22 |
| gij121638912 | putative electron transfer flavoprotein (beta-subunit) fixA [Mycobacterium bovis BCG str. Pasteur 1173P2]        | 509 | 16 |
| gij121639377 | DNA-directed RNA polymerase subunit alpha [Mycobacterium bovis BCG str. Pasteur 1173P2]                          | 498 | 21 |
| gij121636573 | 50S ribosomal protein L7/L12 [Mycobacterium bovis BCG str. Pasteur 1173P2]                                       | 493 | 21 |
| gij121639626 | 2-isopropylmalate synthase [Mycobacterium bovis BCG str. Pasteur 1173P2]                                         | 483 | 17 |
| gij121638407 | putative fatty acid synthase fas [Mycobacterium bovis BCG str. Pasteur 1173P2]                                   | 475 | 58 |
| gij121638180 | heat shock protein 90 [Mycobacterium bovis BCG str. Pasteur 1173P2]                                              | 463 | 18 |
| gij121638096 | dihydrolipoamide acetyltransferase [Mycobacterium bovis BCG str. Pasteur 1173P2]                                 | 455 | 18 |
| gij121637177 | alpha-ketoglutarate decarboxylase [Mycobacterium bovis BCG str. Pasteur 1173P2]                                  | 453 | 28 |
| gij121637779 | putative bacterioferritin bfrA [Mycobacterium bovis BCG str. Pasteur 1173P2]                                     | 434 | 17 |
| gij121635892 | putative iron-regulated peptidyl-prolyl cis-trans isomerase A ppiA [Mycobacterium bovis BCG str. Pasteur 1173P2] | 422 | 12 |
| gij121638719 | translation initiation factor IF-2 [Mycobacterium bovis BCG str. Pasteur 1173P2]                                 | 421 | 23 |
| gij121636391 | Heparin binding hemagglutinin hbhA [Mycobacterium bovis BCG str. Pasteur 1173P2]                                 | 417 | 9  |
| gij121639075 | hypothetical protein BCG_3215c [Mycobacterium bovis BCG str. Pasteur 1173P2]                                     | 415 | 21 |
| gij121636069 | putative NAD(p) transhydrogenase (subunit beta) pntB [Mycobacterium bovis BCG str. Pasteur 1173P2]               | 406 | 16 |
| gij121635889 | DNA gyrase subunit A [Mycobacterium bovis BCG str. Pasteur 1173P2]                                               | 399 | 31 |
| gij121639095 | hypothetical protein BCG_3235c [Mycobacterium bovis BCG str. Pasteur 1173P2]                                     | 392 | 7  |
| gij121637730 | hypothetical protein BCG_1862 [Mycobacterium bovis BCG str. Pasteur 1173P2]                                      | 388 | 16 |
| gij121637322 | S-adenosylmethionine synthetase [Mycobacterium bovis BCG str. Pasteur 1173P2]                                    | 379 | 12 |
| gij121636572 | 50S ribosomal protein L10 [Mycobacterium bovis BCG str. Pasteur 1173P2]                                          | 375 | 10 |
| gij121638877 | D-3-phosphoglycerate dehydrogenase [Mycobacterium bovis BCG str. Pasteur 1173P2]                                 | 373 | 18 |
| gij121639161 | hypothetical protein BCG_3301 [Mycobacterium bovis BCG str. Pasteur 1173P2]                                      | 373 | 9  |
| gij121637169 | malate dehydrogenase [Mycobacterium bovis BCG str. Pasteur 1173P2]                                               | 350 | 13 |
| gij121635964 | single-stranded DNA-binding protein [Mycobacterium bovis BCG str. Pasteur 1173P2]                                | 350 | 10 |
| gij121638327 | putative ribonuclease E rne [Mycobacterium bovis BCG str. Pasteur 1173P2]                                        | 340 | 22 |
| gij121639234 | hypothetical protein BCG_3376 [Mycobacterium bovis BCG str. Pasteur 1173P2]                                      | 340 | 21 |
| gij121636738 | hypothetical protein BCG_0866c [Mycobacterium bovis BCG str. Pasteur 1173P2]                                     | 323 | 6  |
| gij121639759 | putative bacterioferritin bfrB [Mycobacterium bovis BCG str. Pasteur 1173P2]                                     | 320 | 16 |
| gij121636604 | 30S ribosomal protein S7 [Mycobacterium bovis BCG str. Pasteur 1173P2]                                           | 319 | 18 |
| gij121637003 | acetyl-CoA acetyltransferase [Mycobacterium bovis BCG str. Pasteur 1173P2]                                       | 312 | 14 |
| gij121638022 | hypothetical protein BCG_2157c [Mycobacterium bovis BCG str. Pasteur 1173P2]                                     | 312 | 8  |
| gij121638929 | putative NADP-dependent alcohol dehydrogenase adhC [Mycobacterium bovis BCG str. Pasteur 1173P2]                 | 312 | 20 |
| gij121639718 | acyl-CoA synthetase [Mycobacterium bovis BCG str. Pasteur 1173P2]                                                | 309 | 22 |
| gij121636783 | putative fatty oxidation protein fadB [Mycobacterium bovis BCG str. Pasteur 1173P2]                              | 309 | 16 |
| gij121637318 | putative integration host factor mihF [Mycobacterium bovis BCG str. Pasteur 1173P2]                              | 302 | 16 |
| gij121638867 | putative DNA-binding protein HU homolog hupB [Mycobacterium bovis BCG str. Pasteur 1173P2]                       | 294 | 14 |
| gij121636755 | hypothetical protein BCG_0884c [Mycobacterium bovis BCG str. Pasteur 1173P2]                                     | 288 | 15 |
| gij121638853 | putative oxidoreductase [Mycobacterium bovis BCG str. Pasteur 1173P2]                                            | 282 | 7  |
| gij121639034 | NADH dehydrogenase subunit G [Mycobacterium bovis BCG str. Pasteur 1173P2]                                       | 280 | 13 |



|              |                                                                                                                           |     |    |
|--------------|---------------------------------------------------------------------------------------------------------------------------|-----|----|
| gij121639363 | 30S ribosomal protein S9 [Mycobacterium bovis BCG str. Pasteur 1173P2]                                                    | 275 | 10 |
| gij121639677 | <b>19 kDa lipoprotein antigen precursor lpqH [Mycobacterium bovis BCG str. Pasteur 1173P2]</b>                            | 275 | 4  |
| gij121638123 | pyruvate dehydrogenase subunit E1 [Mycobacterium bovis BCG str. Pasteur 1173P2]                                           | 273 | 29 |
| gij121635963 | 30S ribosomal protein S6 [Mycobacterium bovis BCG str. Pasteur 1173P2]                                                    | 265 | 9  |
| gij121637448 | putative polyketide synthase pks5 [Mycobacterium bovis BCG str. Pasteur 1173P2]                                           | 262 | 33 |
| gij121635988 | putative oxidoreductase [Mycobacterium bovis BCG str. Pasteur 1173P2]                                                     | 260 | 14 |
| gij121638790 | 30S ribosomal protein S16 [Mycobacterium bovis BCG str. Pasteur 1173P2]                                                   | 257 | 6  |
| gij121639022 | putative acyl-CoA dehydrogenase fadE24 [Mycobacterium bovis BCG str. Pasteur 1173P2]                                      | 256 | 10 |
| gij121637410 | putative transcriptional regulatory protein moxR1 [Mycobacterium bovis BCG str. Pasteur 1173P2]                           | 256 | 11 |
| gij121637394 | putative cysteine desulfurase csd [Mycobacterium bovis BCG str. Pasteur 1173P2]                                           | 254 | 10 |
| gij121639777 | putative ferredoxin-dependent glutamate synthase [NADPH] large subunit gltB [Mycobacterium bovis BCG str. Pasteur 1173P2] | 253 | 25 |
| gij121636630 | 50S ribosomal protein L16 [Mycobacterium bovis BCG str. Pasteur 1173P2]                                                   | 253 | 8  |
| gij121638027 | hypothetical protein BCG_2162c [Mycobacterium bovis BCG str. Pasteur 1173P2]                                              | 250 | 15 |
| gij121636265 | putative grpE protein (hsp-70 cofactor) [Mycobacterium bovis BCG str. Pasteur 1173P2]                                     | 250 | 9  |
| gij121638771 | 30S ribosomal protein S2 [Mycobacterium bovis BCG str. Pasteur 1173P2]                                                    | 250 | 14 |
| gij121636067 | putative NAD(p) transhydrogenase (subunit alpha) pntAa [Mycobacterium bovis BCG str. Pasteur 1173P2]                      | 248 | 6  |
| gij121638817 | phenolphthiocerol synthesis type-I polyketide synthase ppsE [Mycobacterium bovis BCG str. Pasteur 1173P2]                 | 245 | 23 |
| gij121637479 | hypothetical protein BCG_1610 [Mycobacterium bovis BCG str. Pasteur 1173P2]                                               | 243 | 4  |
| gij121636641 | 50S ribosomal protein L6 [Mycobacterium bovis BCG str. Pasteur 1173P2]                                                    | 239 | 10 |
| gij121639697 | hypothetical protein BCG_3842 [Mycobacterium bovis BCG str. Pasteur 1173P2]                                               | 239 | 9  |
| gij121637396 | hypothetical protein BCG_1527 [Mycobacterium bovis BCG str. Pasteur 1173P2]                                               | 237 | 5  |
| gij121637029 | fumarate hydratase [Mycobacterium bovis BCG str. Pasteur 1173P2]                                                          | 235 | 15 |
| gij121636638 | 50S ribosomal protein L5 [Mycobacterium bovis BCG str. Pasteur 1173P2]                                                    | 230 | 14 |
| gij121636640 | 30S ribosomal protein S8 [Mycobacterium bovis BCG str. Pasteur 1173P2]                                                    | 227 | 7  |
| gij121637366 | putative glyceraldehyde 3-phosphate dehydrogenase gap [Mycobacterium bovis BCG str. Pasteur 1173P2]                       | 226 | 8  |
| gij121637024 | serine hydroxymethyltransferase [Mycobacterium bovis BCG str. Pasteur 1173P2]                                             | 226 | 19 |
| gij121637590 | acyl-CoA synthetase [Mycobacterium bovis BCG str. Pasteur 1173P2]                                                         | 225 | 19 |
| gij121637419 | hypothetical protein BCG_1550 [Mycobacterium bovis BCG str. Pasteur 1173P2]                                               | 224 | 21 |
| gij121636627 | 30S ribosomal protein S19 [Mycobacterium bovis BCG str. Pasteur 1173P2]                                                   | 219 | 11 |
| gij121638065 | hypothetical protein BCG_2200c [Mycobacterium bovis BCG str. Pasteur 1173P2]                                              | 217 | 8  |
| gij121639379 | 30S ribosomal protein S11 [Mycobacterium bovis BCG str. Pasteur 1173P2]                                                   | 216 | 6  |
| gij121636796 | putative acyl-CoA dehydrogenase fadE10 [Mycobacterium bovis BCG str. Pasteur 1173P2]                                      | 216 | 19 |
| gij121638360 | putative ABC transporter ATP-binding protein [Mycobacterium bovis BCG str. Pasteur 1173P2]                                | 214 | 15 |
| gij121637393 | putative ATP-binding protein ABC transporter [Mycobacterium bovis BCG str. Pasteur 1173P2]                                | 213 | 7  |
| gij121639376 | 50S ribosomal protein L17 [Mycobacterium bovis BCG str. Pasteur 1173P2]                                                   | 212 | 14 |
| gij121638345 | trigger factor [Mycobacterium bovis BCG str. Pasteur 1173P2]                                                              | 211 | 10 |
| gij121639503 | putative transcription factor [Mycobacterium bovis BCG str. Pasteur 1173P2]                                               | 202 | 9  |
| gij121636498 | hypothetical protein BCG_0625c [Mycobacterium bovis BCG str. Pasteur 1173P2]                                              | 197 | 6  |
| gij121637236 | F0F1 ATP synthase subunit delta [Mycobacterium bovis BCG str. Pasteur 1173P2]                                             | 196 | 13 |
| gij121635900 | thioredoxin trxC (TRX) (MPT46) [Mycobacterium bovis BCG str. Pasteur 1173P2]                                              | 196 | 4  |
| gij121639634 | hypothetical protein BCG_3778c [Mycobacterium bovis BCG str. Pasteur 1173P2]                                              | 194 | 8  |

|              |                                                                                                                  |     |    |
|--------------|------------------------------------------------------------------------------------------------------------------|-----|----|
| gij121639708 | short chain dehydrogenase [Mycobacterium bovis BCG str. Pasteur 1173P2]                                          | 194 | 7  |
| gij121636624 | 50S ribosomal protein L4 [Mycobacterium bovis BCG str. Pasteur 1173P2]                                           | 192 | 10 |
| gij121639541 | inorganic pyrophosphatase ppa [Mycobacterium bovis BCG str. Pasteur 1173P2]                                      | 192 | 9  |
| gij121637818 | putative oxidoreductase fadB5 [Mycobacterium bovis BCG str. Pasteur 1173P2]                                      | 189 | 11 |
| gij121636782 | acetyl-CoA acetyltransferase [Mycobacterium bovis BCG str. Pasteur 1173P2]                                       | 187 | 10 |
| gij121639085 | putative transmembrane cation transporter [Mycobacterium bovis BCG str. Pasteur 1173P2]                          | 187 | 9  |
| gij121638134 | putative flavoprotein [Mycobacterium bovis BCG str. Pasteur 1173P2]                                              | 184 | 10 |
| gij121638447 | putative glutamine-transport transmembrane protein ABC transporter [Mycobacterium bovis BCG str. Pasteur 1173P2] | 179 | 6  |
| gij121638750 | 4-hydroxy-3-methylbut-2-en-1-yl diphosphate synthase [Mycobacterium bovis BCG str. Pasteur 1173P2]               | 179 | 10 |
| gij121636556 | (3R)-hydroxyacyl-ACP dehydratase subunit HadA [Mycobacterium bovis BCG str. Pasteur 1173P2]                      | 176 | 2  |
| gij121636199 | hypothetical protein BCG_0324 [Mycobacterium bovis BCG str. Pasteur 1173P2]                                      | 176 | 25 |
| gij121638104 | putative glutamine synthetase glnA2 [Mycobacterium bovis BCG str. Pasteur 1173P2]                                | 175 | 16 |
| gij121639364 | 50S ribosomal protein L13 [Mycobacterium bovis BCG str. Pasteur 1173P2]                                          | 174 | 11 |
| gij121635930 | hypothetical protein BCG_0050c [Mycobacterium bovis BCG str. Pasteur 1173P2]                                     | 174 | 10 |
| gij121636676 | putative methylmalonate-semialdehyde dehydrogenase mmsA [Mycobacterium bovis BCG str. Pasteur 1173P2]            | 173 | 12 |
| gij121637009 | transcription elongation factor GreA [Mycobacterium bovis BCG str. Pasteur 1173P2]                               | 173 | 10 |
| gij121637724 | preprotein translocase subunit SecA [Mycobacterium bovis BCG str. Pasteur 1173P2]                                | 172 | 29 |
| gij121636484 | putative nucleotide-binding protein [Mycobacterium bovis BCG str. Pasteur 1173P2]                                | 170 | 7  |
| gij121638511 | putative methyltransferase [Mycobacterium bovis BCG str. Pasteur 1173P2]                                         | 170 | 11 |
| gij121638128 | 3-oxoacyl-(acyl carrier protein) synthase II [Mycobacterium bovis BCG str. Pasteur 1173P2]                       | 169 | 11 |
| gij121636558 | (3R)-hydroxyacyl-ACP dehydratase subunit HadC [Mycobacterium bovis BCG str. Pasteur 1173P2]                      | 169 | 8  |
| gij121638828 | putative polyketide synthase pks1 [Mycobacterium bovis BCG str. Pasteur 1173P2]                                  | 169 | 31 |
| gij121637524 | pyruvate kinase [Mycobacterium bovis BCG str. Pasteur 1173P2]                                                    | 169 | 13 |
| gij121637775 | putative L-lactate dehydrogenase (cytochrome) lldD2 [Mycobacterium bovis BCG str. Pasteur 1173P2]                | 169 | 12 |
| gij121638472 | preprotein translocase subunit SecD [Mycobacterium bovis BCG str. Pasteur 1173P2]                                | 169 | 9  |
| gij121638325 | 50S ribosomal protein L21 [Mycobacterium bovis BCG str. Pasteur 1173P2]                                          | 169 | 8  |
| gij121639111 | RNA polymerase sigma factor RpoE [Mycobacterium bovis BCG str. Pasteur 1173P2]                                   | 168 | 3  |
| gij121638404 | putative bacterioferritin comigratory protein bcp [Mycobacterium bovis BCG str. Pasteur 1173P2]                  | 167 | 7  |
| gij121635966 | 50S ribosomal protein L9 [Mycobacterium bovis BCG str. Pasteur 1173P2]                                           | 166 | 3  |
| gij121639710 | integral membrane indolylacetyltransferase embC [Mycobacterium bovis BCG str. Pasteur 1173P2]                    | 166 | 18 |
| gij121636632 | 30S ribosomal protein S17 [Mycobacterium bovis BCG str. Pasteur 1173P2]                                          | 165 | 10 |
| gij121636623 | 50S ribosomal protein L3 [Mycobacterium bovis BCG str. Pasteur 1173P2]                                           | 164 | 6  |
| gij121636855 | transmembrane serine/threonine-protein kinase D pknDa [Mycobacterium bovis BCG str. Pasteur 1173P2]              | 162 | 10 |
| gij121638770 | elongation factor Ts [Mycobacterium bovis BCG str. Pasteur 1173P2]                                               | 162 | 10 |
| gij121639242 | succinate dehydrogenase flavoprotein subunit [Mycobacterium bovis BCG str. Pasteur 1173P2]                       | 162 | 19 |
| gij121636877 | succinyl-CoA synthetase subunit alpha [Mycobacterium bovis BCG str. Pasteur 1173P2]                              | 161 | 14 |
| gij121638350 | putative aminopeptidase N pepN [Mycobacterium bovis BCG str. Pasteur 1173P2]                                     | 161 | 10 |
| gij121639632 | hypothetical protein BCG_3776c [Mycobacterium bovis BCG str. Pasteur 1173P2]                                     | 160 | 2  |
| gij121639045 | putative dioxygenase [Mycobacterium bovis BCG str. Pasteur 1173P2]                                               | 160 | 10 |
| gij121639041 | NADH dehydrogenase subunit N [Mycobacterium bovis BCG str. Pasteur 1173P2]                                       | 159 | 2  |
| gij121639561 | putative cold shock protein A cspA [Mycobacterium bovis BCG str. Pasteur 1173P2]                                 | 157 | 5  |

|              |                                                                                                                                             |     |    |
|--------------|---------------------------------------------------------------------------------------------------------------------------------------------|-----|----|
| gij121639380 | 30S ribosomal protein S13 [Mycobacterium bovis BCG str. Pasteur 1173P2]                                                                     | 156 | 7  |
| gij121639504 | <b>putative lipoprotein lpqE [Mycobacterium bovis BCG str. Pasteur 1173P2]</b>                                                              | 155 | 5  |
| gij121635885 | DNA polymerase III subunit beta [Mycobacterium bovis BCG str. Pasteur 1173P2]                                                               | 155 | 12 |
| gij121636562 | 50S ribosomal protein L1 [Mycobacterium bovis BCG str. Pasteur 1173P2]                                                                      | 155 | 12 |
| gij121638343 | ATP-dependent Clp protease proteolytic subunit [Mycobacterium bovis BCG str. Pasteur 1173P2]                                                | 154 | 12 |
| gij121638785 | 50S ribosomal protein L19 [Mycobacterium bovis BCG str. Pasteur 1173P2]                                                                     | 153 | 8  |
| gij121639135 | two component sensory transduction transcriptional regulatory protein mtrA [Mycobacterium bovis BCG str. Pasteur 1173P2]                    | 152 | 8  |
| gij121639466 | hypothetical protein BCG_3611 [Mycobacterium bovis BCG str. Pasteur 1173P2]                                                                 | 151 | 7  |
| gij121639023 | putative acyl-CoA dehydrogenase fadE23 [Mycobacterium bovis BCG str. Pasteur 1173P2]                                                        | 151 | 9  |
| gij121639227 | hypothetical protein BCG_3369 [Mycobacterium bovis BCG str. Pasteur 1173P2]                                                                 | 149 | 5  |
| gij121636685 | putative zinc-containing alcohol dehydrogenase NAD dependant adhB [Mycobacterium bovis BCG str. Pasteur 1173P2]                             | 148 | 7  |
| gij121636118 | transmembrane transport protein mmpL3 [Mycobacterium bovis BCG str. Pasteur 1173P2]                                                         | 148 | 9  |
| gij121636557 | (3R)-hydroxyacyl-ACP dehydratase subunit HadB [Mycobacterium bovis BCG str. Pasteur 1173P2]                                                 | 147 | 4  |
| gij121636642 | 50S ribosomal protein L18 [Mycobacterium bovis BCG str. Pasteur 1173P2]                                                                     | 147 | 9  |
| gij121637384 | putative quinone reductase qor [Mycobacterium bovis BCG str. Pasteur 1173P2]                                                                | 146 | 11 |
| gij121639182 | putative piperideine-6-carboxylic acid dehydrogenase pcd [Mycobacterium bovis BCG str. Pasteur 1173P2]                                      | 145 | 14 |
| gij121638083 | adenosine kinase [Mycobacterium bovis BCG str. Pasteur 1173P2]                                                                              | 144 | 6  |
| gij121636622 | 30S ribosomal protein S10 [Mycobacterium bovis BCG str. Pasteur 1173P2]                                                                     | 143 | 8  |
| gij121636379 | hypothetical protein BCG_0504c [Mycobacterium bovis BCG str. Pasteur 1173P2]                                                                | 143 | 6  |
| gij121636042 | secreted antigen 85-c fbpC (85C) [Mycobacterium bovis BCG str. Pasteur 1173P2]                                                              | 140 | 8  |
| gij121638328 | nucleoside diphosphate kinase [Mycobacterium bovis BCG str. Pasteur 1173P2]                                                                 | 137 | 5  |
| gij121636681 | putative two component system response transcriptional positive regulator phoP [Mycobacterium bovis BCG str. Pasteur 1173P2]                | 137 | 4  |
| gij121636603 | 30S ribosomal protein S12 [Mycobacterium bovis BCG str. Pasteur 1173P2]                                                                     | 135 | 6  |
| gij121637787 | hypothetical protein BCG_1920c [Mycobacterium bovis BCG str. Pasteur 1173P2]                                                                | 134 | 3  |
| gij121639517 | putative Isr2 protein precursor [Mycobacterium bovis BCG str. Pasteur 1173P2]                                                               | 133 | 6  |
| gij121639428 | hypothetical protein BCG_3573c [Mycobacterium bovis BCG str. Pasteur 1173P2]                                                                | 133 | 11 |
| gij121636559 | preprotein translocase subunit SecE [Mycobacterium bovis BCG str. Pasteur 1173P2]                                                           | 133 | 1  |
| gij121639313 | putative dehydrogenase [Mycobacterium bovis BCG str. Pasteur 1173P2]                                                                        | 133 | 3  |
| gij121636252 | putative iron-sulfur-binding reductase [Mycobacterium bovis BCG str. Pasteur 1173P2]                                                        | 133 | 23 |
| gij121639174 | putative bifunctional protein acetyl-/propionyl-coenzyme A carboxylase (alpha chain) accA3: biotin carboxylase + biotin carboxyl carrier pi | 130 | 22 |
| gij121636059 | putative aldehyde dehydrogenase (NAD+) dependant [Mycobacterium bovis BCG str. Pasteur 1173P2]                                              | 130 | 8  |
| gij121636040 | hypothetical protein BCG_0161 [Mycobacterium bovis BCG str. Pasteur 1173P2]                                                                 | 129 | 11 |
| gij121639404 | short chain dehydrogenase [Mycobacterium bovis BCG str. Pasteur 1173P2]                                                                     | 128 | 6  |
| gij121636739 | putative thiosulfate sulfurtransferase cysA2 [Mycobacterium bovis BCG str. Pasteur 1173P2]                                                  | 127 | 12 |
| gij121639661 | hypothetical protein BCG_3806 [Mycobacterium bovis BCG str. Pasteur 1173P2]                                                                 | 127 | 3  |
| gij121636228 | hypothetical protein BCG_0353 [Mycobacterium bovis BCG str. Pasteur 1173P2]                                                                 | 127 | 4  |
| gij121637379 | transketolase [Mycobacterium bovis BCG str. Pasteur 1173P2]                                                                                 | 126 | 16 |
| gij121636066 | putative acyl-CoA dehydrogenase fadE2 [Mycobacterium bovis BCG str. Pasteur 1173P2]                                                         | 126 | 13 |
| gij121637334 | putative transcriptional regulatory protein [Mycobacterium bovis BCG str. Pasteur 1173P2]                                                   | 125 | 10 |
| gij121636154 | hypothetical protein BCG_0279c [Mycobacterium bovis BCG str. Pasteur 1173P2]                                                                | 124 | 10 |
| gij121636626 | 50S ribosomal protein L2 [Mycobacterium bovis BCG str. Pasteur 1173P2]                                                                      | 124 | 8  |

|              |                                                                                                                        |     |    |
|--------------|------------------------------------------------------------------------------------------------------------------------|-----|----|
| gij121638440 | alanyl-tRNA synthetase [Mycobacterium bovis BCG str. Pasteur 1173P2]                                                   | 124 | 22 |
| gij121636911 | putative pterin-4-alpha-carbinolamine dehydratase moaB2 [Mycobacterium bovis BCG str. Pasteur 1173P2]                  | 123 | 4  |
| gij121636551 | enoyl-CoA hydratase [Mycobacterium bovis BCG str. Pasteur 1173P2]                                                      | 123 | 9  |
| gij121639158 | hypothetical protein BCG_3298 [Mycobacterium bovis BCG str. Pasteur 1173P2]                                            | 121 | 6  |
| gij121637976 | hypothetical protein BCG_2111c [Mycobacterium bovis BCG str. Pasteur 1173P2]                                           | 120 | 3  |
| gij121637238 | F0F1 ATP synthase subunit gamma [Mycobacterium bovis BCG str. Pasteur 1173P2]                                          | 118 | 15 |
| gij121637415 | enoyl-(acyl carrier protein) reductase [Mycobacterium bovis BCG str. Pasteur 1173P2]                                   | 118 | 5  |
| gij121636807 | phosphoserine aminotransferase [Mycobacterium bovis BCG str. Pasteur 1173P2]                                           | 117 | 5  |
| gij121636859 | <b>periplasmic phosphate-binding lipoprotein pstS1 [Mycobacterium bovis BCG str. Pasteur 1173P2]</b>                   | 115 | 2  |
| gij121639591 | hypothetical protein BCG_3736c [Mycobacterium bovis BCG str. Pasteur 1173P2]                                           | 115 | 2  |
| gij121639326 | hypothetical protein BCG_3471 [Mycobacterium bovis BCG str. Pasteur 1173P2]                                            | 114 | 8  |
| gij121636205 | putative transmembrane protein [Mycobacterium bovis BCG str. Pasteur 1173P2]                                           | 114 | 5  |
| gij121636163 | hypothetical protein BCG_0288c [Mycobacterium bovis BCG str. Pasteur 1173P2]                                           | 113 | 5  |
| gij121637189 | hypothetical protein BCG_1320c [Mycobacterium bovis BCG str. Pasteur 1173P2]                                           | 112 | 7  |
| gij121636819 | type II citrate synthase [Mycobacterium bovis BCG str. Pasteur 1173P2]                                                 | 111 | 4  |
| gij121638932 | ribonucleotide-diphosphate reductase subunit beta [Mycobacterium bovis BCG str. Pasteur 1173P2]                        | 111 | 20 |
| gij121636292 | putative protein transport protein secE2 [Mycobacterium bovis BCG str. Pasteur 1173P2]                                 | 111 | 4  |
| gij121638869 | isopropylmalate isomerase large subunit [Mycobacterium bovis BCG str. Pasteur 1173P2]                                  | 110 | 20 |
| gij121637378 | transaldolase [Mycobacterium bovis BCG str. Pasteur 1173P2]                                                            | 110 | 16 |
| gij121636645 | 50S ribosomal protein L15 [Mycobacterium bovis BCG str. Pasteur 1173P2]                                                | 110 | 6  |
| gij121639163 | putative acyl-CoA dehydrogenase fadE25 [Mycobacterium bovis BCG str. Pasteur 1173P2]                                   | 109 | 12 |
| gij121636160 | fumarate reductase iron-sulfur subunit [Mycobacterium bovis BCG str. Pasteur 1173P2]                                   | 109 | 11 |
| gij121639083 | putative glutaredoxin protein [Mycobacterium bovis BCG str. Pasteur 1173P2]                                            | 107 | 1  |
| gij121638935 | ribonucleotide-diphosphate reductase subunit alpha [Mycobacterium bovis BCG str. Pasteur 1173P2]                       | 106 | 11 |
| gij121638139 | hypothetical protein BCG_2274c [Mycobacterium bovis BCG str. Pasteur 1173P2]                                           | 105 | 2  |
| gij121638616 | epoxide hydrolase [Mycobacterium bovis BCG str. Pasteur 1173P2]                                                        | 105 | 3  |
| gij121637551 | 50S ribosomal protein L20 [Mycobacterium bovis BCG str. Pasteur 1173P2]                                                | 105 | 4  |
| gij121636629 | 30S ribosomal protein S3 [Mycobacterium bovis BCG str. Pasteur 1173P2]                                                 | 105 | 17 |
| gij121639473 | putative electron transfer protein fdxB [Mycobacterium bovis BCG str. Pasteur 1173P2]                                  | 103 | 9  |
| gij121636383 | 3-hydroxybutyryl-CoA dehydrogenase [Mycobacterium bovis BCG str. Pasteur 1173P2]                                       | 102 | 10 |
| gij121635977 | putative isocitrate dehydrogenase [Mycobacterium bovis BCG str. Pasteur 1173P2]                                        | 102 | 21 |
| gij121636643 | 30S ribosomal protein S5 [Mycobacterium bovis BCG str. Pasteur 1173P2]                                                 | 102 | 8  |
| gij121636179 | putative 5-oxoprolinase oplA [Mycobacterium bovis BCG str. Pasteur 1173P2]                                             | 101 | 29 |
| gij121637824 | hypothetical protein BCG_1958c [Mycobacterium bovis BCG str. Pasteur 1173P2]                                           | 100 | 3  |
| gij121638596 | putative transmembrane alanine and glycine rich protein [Mycobacterium bovis BCG str. Pasteur 1173P2]                  | 99  | 9  |
| gij121636999 | enoyl-CoA hydratase [Mycobacterium bovis BCG str. Pasteur 1173P2]                                                      | 99  | 5  |
| gij121639691 | enoyl-CoA hydratase [Mycobacterium bovis BCG str. Pasteur 1173P2]                                                      | 97  | 11 |
| gij121639191 | putative glycerol-3-phosphate dehydrogenase glpD2 [Mycobacterium bovis BCG str. Pasteur 1173P2]                        | 97  | 15 |
| gij121639764 | superoxide dismutase [Fe] sodA [Mycobacterium bovis BCG str. Pasteur 1173P2]                                           | 96  | 3  |
| gij121639164 | putative phosphoribosylaminoimidazole carboxylase catalytic subunit purE [Mycobacterium bovis BCG str. Pasteur 1173P2] | 96  | 4  |
| gij121636377 | dihydrolipoamide dehydrogenase [Mycobacterium bovis BCG str. Pasteur 1173P2]                                           | 96  | 14 |

|              |                                                                                                                                         |    |    |
|--------------|-----------------------------------------------------------------------------------------------------------------------------------------|----|----|
| gij121639091 | hypothetical protein BCG_3231c [Mycobacterium bovis BCG str. Pasteur 1173P2]                                                            | 95 | 7  |
| gij121636828 | enoyl-CoA hydratase [Mycobacterium bovis BCG str. Pasteur 1173P2]                                                                       | 95 | 5  |
| gij121638108 | hypothetical protein BCG_2243 [Mycobacterium bovis BCG str. Pasteur 1173P2]                                                             | 94 | 8  |
| gij121638179 | hypothetical protein BCG_2314 [Mycobacterium bovis BCG str. Pasteur 1173P2]                                                             | 93 | 3  |
| gij121636092 | putative transmembrane protein [Mycobacterium bovis BCG str. Pasteur 1173P2]                                                            | 93 | 7  |
| gij121636882 | bifunctional phosphoribosylaminoimidazolecarboxamide formyltransferase/IMP cyclohydrolase [Mycobacterium bovis BCG str. Pasteur 1173P2] | 93 | 5  |
| gij121637837 | thiol peroxidase [Mycobacterium bovis BCG str. Pasteur 1173P2]                                                                          | 92 | 6  |
| gij121636532 | hypothetical protein BCG_0660c [Mycobacterium bovis BCG str. Pasteur 1173P2]                                                            | 91 | 12 |
| gij121636952 | phosphopyruvate hydratase [Mycobacterium bovis BCG str. Pasteur 1173P2]                                                                 | 91 | 11 |
| gij121637240 | F0F1 ATP synthase subunit epsilon [Mycobacterium bovis BCG str. Pasteur 1173P2]                                                         | 91 | 4  |
| gij121639790 | hypothetical protein BCG_3935c [Mycobacterium bovis BCG str. Pasteur 1173P2]                                                            | 90 | 2  |
| gij121636554 | hypothetical protein BCG_0682 [Mycobacterium bovis BCG str. Pasteur 1173P2]                                                             | 90 | 4  |
| gij121639029 | NADH dehydrogenase subunit B [Mycobacterium bovis BCG str. Pasteur 1173P2]                                                              | 89 | 10 |
| gij121639321 | GMP synthase [Mycobacterium bovis BCG str. Pasteur 1173P2]                                                                              | 88 | 12 |
| gij121638665 | 30S ribosomal protein S15 [Mycobacterium bovis BCG str. Pasteur 1173P2]                                                                 | 87 | 11 |
| gij121638870 | putative transcriptional regulatory protein [Mycobacterium bovis BCG str. Pasteur 1173P2]                                               | 87 | 4  |
| gij121638095 | short chain dehydrogenase [Mycobacterium bovis BCG str. Pasteur 1173P2]                                                                 | 86 | 17 |
| gij121638823 | acyl-CoA synthetase [Mycobacterium bovis BCG str. Pasteur 1173P2]                                                                       | 86 | 6  |
| gij121636856 | <b>periplasmic phosphate-binding lipoprotein pstS2 [Mycobacterium bovis BCG str. Pasteur 1173P2]</b>                                    | 85 | 4  |
| gij121639770 | putative histone-like protein hns [Mycobacterium bovis BCG str. Pasteur 1173P2]                                                         | 85 | 4  |
| gij121636599 | hypothetical protein BCG_0727 [Mycobacterium bovis BCG str. Pasteur 1173P2]                                                             | 85 | 4  |
| gij121638471 | preprotein translocase subunit SecF [Mycobacterium bovis BCG str. Pasteur 1173P2]                                                       | 84 | 7  |
| gij121638293 | 30S ribosomal protein S20 [Mycobacterium bovis BCG str. Pasteur 1173P2]                                                                 | 84 | 7  |
| gij121638892 | 6-phosphofructokinase [Mycobacterium bovis BCG str. Pasteur 1173P2]                                                                     | 84 | 8  |
| gij121638348 | ribose-5-phosphate isomerase B [Mycobacterium bovis BCG str. Pasteur 1173P2]                                                            | 84 | 4  |
| gij121638574 | hypothetical protein BCG_2712c [Mycobacterium bovis BCG str. Pasteur 1173P2]                                                            | 84 | 2  |
| gij121637254 | acetyl-CoA acetyltransferase [Mycobacterium bovis BCG str. Pasteur 1173P2]                                                              | 83 | 3  |
| gij121636967 | putative ESAT-6 like protein 1 [Mycobacterium bovis BCG str. Pasteur 1173P2]                                                            | 83 | 1  |
| gij121638548 | putative transmembrane protein [Mycobacterium bovis BCG str. Pasteur 1173P2]                                                            | 83 | 14 |
| gij121638865 | polyphosphate kinase [Mycobacterium bovis BCG str. Pasteur 1173P2]                                                                      | 82 | 15 |
| gij121636561 | 50S ribosomal protein L11 [Mycobacterium bovis BCG str. Pasteur 1173P2]                                                                 | 82 | 3  |
| gij121637367 | phosphoglycerate kinase [Mycobacterium bovis BCG str. Pasteur 1173P2]                                                                   | 82 | 8  |
| gij121638048 | cell division protein MraZ [Mycobacterium bovis BCG str. Pasteur 1173P2]                                                                | 81 | 2  |
| gij121637695 | hypothetical protein BCG_1826 [Mycobacterium bovis BCG str. Pasteur 1173P2]                                                             | 81 | 4  |
| gij121639589 | CRP/FNR family transcriptional regulator [Mycobacterium bovis BCG str. Pasteur 1173P2]                                                  | 81 | 6  |
| gij121636353 | short chain dehydrogenase [Mycobacterium bovis BCG str. Pasteur 1173P2]                                                                 | 81 | 5  |
| gij121637735 | glycine dehydrogenase [Mycobacterium bovis BCG str. Pasteur 1173P2]                                                                     | 81 | 10 |
| gij121638097 | hypothetical protein BCG_2232 [Mycobacterium bovis BCG str. Pasteur 1173P2]                                                             | 80 | 2  |
| gij121638883 | ketol-acid reductoisomerase [Mycobacterium bovis BCG str. Pasteur 1173P2]                                                               | 80 | 8  |
| gij121638644 | putative alanine rich hydrolase [Mycobacterium bovis BCG str. Pasteur 1173P2]                                                           | 80 | 5  |
| gij121638850 | putative membrane or secreted protein [Mycobacterium bovis BCG str. Pasteur 1173P2]                                                     | 80 | 4  |

|              |                                                                                                                         |    |    |
|--------------|-------------------------------------------------------------------------------------------------------------------------|----|----|
| gij121636563 | methoxy mycolic acid synthase [Mycobacterium bovis BCG str. Pasteur 1173P2]                                             | 80 | 10 |
| gij121635907 | putative inner membrane protein translocase component YidC [Mycobacterium bovis BCG str. Pasteur 1173P2]                | 80 | 8  |
| gij121638589 | hypothetical protein BCG_2727 [Mycobacterium bovis BCG str. Pasteur 1173P2]                                             | 79 | 6  |
| gij121636576 | putative ribonucleotide-transport ATP-binding protein ABC transporter mkl [Mycobacterium bovis BCG str. Pasteur 1173P2] | 79 | 7  |
| gij121635956 | myo-inositol-1-phosphate synthase INO1 [Mycobacterium bovis BCG str. Pasteur 1173P2]                                    | 79 | 8  |
| gij121636230 | putative beta-1,3-glucanase precursor [Mycobacterium bovis BCG str. Pasteur 1173P2]                                     | 79 | 10 |
| gij121636653 | hypothetical protein BCG_0781c [Mycobacterium bovis BCG str. Pasteur 1173P2]                                            | 78 | 6  |
| gij121639717 | polyketide synthase pks13 [Mycobacterium bovis BCG str. Pasteur 1173P2]                                                 | 78 | 23 |
| gij121638960 | hypothetical protein BCG_3100c [Mycobacterium bovis BCG str. Pasteur 1173P2]                                            | 77 | 8  |
| gij121637373 | hypothetical protein BCG_1504c [Mycobacterium bovis BCG str. Pasteur 1173P2]                                            | 76 | 4  |
| gij121636777 | hypothetical protein BCG_0906 [Mycobacterium bovis BCG str. Pasteur 1173P2]                                             | 76 | 3  |
| gij121639467 | short chain dehydrogenase [Mycobacterium bovis BCG str. Pasteur 1173P2]                                                 | 76 | 6  |
| gij121638085 | hypothetical protein BCG_2220c [Mycobacterium bovis BCG str. Pasteur 1173P2]                                            | 76 | 4  |
| gij121636384 | putative mycolic acid synthase umaA1 [Mycobacterium bovis BCG str. Pasteur 1173P2]                                      | 75 | 10 |
| gij121639695 | putative aminotransferase [Mycobacterium bovis BCG str. Pasteur 1173P2]                                                 | 74 | 4  |
| gij121637212 | Beta-carbonic anhydrase [Mycobacterium bovis BCG str. Pasteur 1173P2]                                                   | 74 | 8  |
| gij121638420 | putative transmembrane protein [Mycobacterium bovis BCG str. Pasteur 1173P2]                                            | 73 | 7  |
| gij121636202 | hypothetical protein BCG_0327 [Mycobacterium bovis BCG str. Pasteur 1173P2]                                             | 73 | 1  |
| gij121639625 | aspartate kinase [Mycobacterium bovis BCG str. Pasteur 1173P2]                                                          | 73 | 6  |
| gij121636968 | putative ESAT-6 like protein 2 [Mycobacterium bovis BCG str. Pasteur 1173P2]                                            | 72 | 6  |
| gij121639026 | putative response regulator [Mycobacterium bovis BCG str. Pasteur 1173P2]                                               | 72 | 4  |
| gij121636876 | succinyl-CoA synthetase subunit beta [Mycobacterium bovis BCG str. Pasteur 1173P2]                                      | 72 | 7  |
| gij121636946 | ribose-phosphate pyrophosphokinase [Mycobacterium bovis BCG str. Pasteur 1173P2]                                        | 72 | 14 |
| gij121637509 | imidazole glycerol phosphate synthase subunit HisH [Mycobacterium bovis BCG str. Pasteur 1173P2]                        | 70 | 2  |
| gij121636400 | putative short-chain type oxidoreductase [Mycobacterium bovis BCG str. Pasteur 1173P2]                                  | 70 | 3  |
| gij121637560 | N-acetyl-gamma-glutamyl-phosphate reductase [Mycobacterium bovis BCG str. Pasteur 1173P2]                               | 70 | 8  |
| gij121639032 | NADH dehydrogenase subunit E [Mycobacterium bovis BCG str. Pasteur 1173P2]                                              | 70 | 2  |
| gij121637112 | putative polyketide beta-ketoacyl synthase pks3 [Mycobacterium bovis BCG str. Pasteur 1173P2]                           | 70 | 12 |
| gij121637259 | putative glycogen phosphorylase glgP [Mycobacterium bovis BCG str. Pasteur 1173P2]                                      | 69 | 22 |
| gij121636598 | putative membrane protein mmpS5 [Mycobacterium bovis BCG str. Pasteur 1173P2]                                           | 69 | 2  |
| gij121638177 | haloalkane dehalogenase [Mycobacterium bovis BCG str. Pasteur 1173P2]                                                   | 68 | 9  |
| gij121637320 | DNA-directed RNA polymerase subunit omega [Mycobacterium bovis BCG str. Pasteur 1173P2]                                 | 67 | 2  |
| gij121638094 | leucyl aminopeptidase [Mycobacterium bovis BCG str. Pasteur 1173P2]                                                     | 67 | 2  |
| gij121638843 | putative glycosyl transferase [Mycobacterium bovis BCG str. Pasteur 1173P2]                                             | 67 | 11 |
| gij121637135 | acyl-CoA synthetase [Mycobacterium bovis BCG str. Pasteur 1173P2]                                                       | 67 | 10 |
| gij121638927 | putative cytochrome C oxidase polypeptide I ctaD [Mycobacterium bovis BCG str. Pasteur 1173P2]                          | 67 | 8  |
| gij121638309 | gamma-glutamyl phosphate reductase [Mycobacterium bovis BCG str. Pasteur 1173P2]                                        | 67 | 12 |
| gij121636306 | putative secreted protein [Mycobacterium bovis BCG str. Pasteur 1173P2]                                                 | 66 | 2  |
| gij121636628 | 50S ribosomal protein L22 [Mycobacterium bovis BCG str. Pasteur 1173P2]                                                 | 66 | 7  |
| gij121637520 | tryptophan synthase subunit alpha [Mycobacterium bovis BCG str. Pasteur 1173P2]                                         | 66 | 4  |
| gij121639733 | putative acyltransferase [Mycobacterium bovis BCG str. Pasteur 1173P2]                                                  | 66 | 16 |

|              |                                                                                                                  |    |    |
|--------------|------------------------------------------------------------------------------------------------------------------|----|----|
| gij121635925 | transmembrane serine/threonine-protein kinase A pknA [Mycobacterium bovis BCG str. Pasteur 1173P2]               | 66 | 3  |
| gij121636422 | hypothetical protein BCG_0547c [Mycobacterium bovis BCG str. Pasteur 1173P2]                                     | 66 | 2  |
| gij121639243 | succinate dehydrogenase iron-sulfur subunit [Mycobacterium bovis BCG str. Pasteur 1173P2]                        | 66 | 5  |
| gij121639650 | hypothetical protein BCG_3794c [Mycobacterium bovis BCG str. Pasteur 1173P2]                                     | 66 | 7  |
| gij121637991 | proteasome subunit alpha PrcA [Mycobacterium bovis BCG str. Pasteur 1173P2]                                      | 65 | 3  |
| gij121636477 | putative secreted protein [Mycobacterium bovis BCG str. Pasteur 1173P2]                                          | 65 | 1  |
| gij121637341 | <b>putative lipoprotein lprG [Mycobacterium bovis BCG str. Pasteur 1173P2]</b>                                   | 65 | 1  |
| gij121639181 | hypothetical protein BCG_3321 [Mycobacterium bovis BCG str. Pasteur 1173P2]                                      | 65 | 7  |
| gij121637610 | putative catechol-o-methyltransferase [Mycobacterium bovis BCG str. Pasteur 1173P2]                              | 65 | 8  |
| gij121637346 | 6,7-dimethyl-8-ribityllumazine synthase [Mycobacterium bovis BCG str. Pasteur 1173P2]                            | 64 | 9  |
| gij121639582 | putative transmembrane protein [Mycobacterium bovis BCG str. Pasteur 1173P2]                                     | 64 | 4  |
| gij121638324 | 50S ribosomal protein L27 [Mycobacterium bovis BCG str. Pasteur 1173P2]                                          | 63 | 7  |
| gij121637563 | acetylornithine aminotransferase [Mycobacterium bovis BCG str. Pasteur 1173P2]                                   | 63 | 7  |
| gij121638183 | hypothetical protein BCG_2318 [Mycobacterium bovis BCG str. Pasteur 1173P2]                                      | 63 | 2  |
| gij121638058 | putative 3-deoxy-D-arabino-heptulosonate 7-phosphate synthase AroG [Mycobacterium bovis BCG str. Pasteur 1173P2] | 62 | 7  |
| gij121639705 | nucleoside diphosphate kinase regulator [Mycobacterium bovis BCG str. Pasteur 1173P2]                            | 62 | 4  |
| gij121637226 | transcription termination factor Rho [Mycobacterium bovis BCG str. Pasteur 1173P2]                               | 62 | 19 |
| gij121636095 | putative lysophospholipase [Mycobacterium bovis BCG str. Pasteur 1173P2]                                         | 62 | 2  |
| gij121637680 | hypothetical protein BCG_1811c [Mycobacterium bovis BCG str. Pasteur 1173P2]                                     | 62 | 6  |
| gij121639035 | NADH dehydrogenase subunit H [Mycobacterium bovis BCG str. Pasteur 1173P2]                                       | 61 | 11 |
| gij121638381 | putative oxidase regulatory-related protein [Mycobacterium bovis BCG str. Pasteur 1173P2]                        | 61 | 2  |
| gij121638245 | putative transmembrane protein [Mycobacterium bovis BCG str. Pasteur 1173P2]                                     | 61 | 6  |
| gij121637054 | 6-phosphogluconate dehydrogenase-like protein [Mycobacterium bovis BCG str. Pasteur 1173P2]                      | 61 | 8  |
| gij121638757 | major secreted immunogenic protein mpb70 precursor [Mycobacterium bovis BCG str. Pasteur 1173P2]                 | 59 | 1  |
| gij121636364 | putative transmembrane transport protein mmpL4 [Mycobacterium bovis BCG str. Pasteur 1173P2]                     | 59 | 9  |
| gij121639232 | uracil phosphoribosyltransferase [Mycobacterium bovis BCG str. Pasteur 1173P2]                                   | 59 | 7  |
| gij121636448 | hypothetical protein BCG_0573 [Mycobacterium bovis BCG str. Pasteur 1173P2]                                      | 59 | 6  |
| gij121635951 | leucyl-tRNA synthetase [Mycobacterium bovis BCG str. Pasteur 1173P2]                                             | 59 | 11 |
| gij121636084 | MCE-family protein mce1D [Mycobacterium bovis BCG str. Pasteur 1173P2]                                           | 58 | 12 |
| gij121636639 | 30S ribosomal protein S14 [Mycobacterium bovis BCG str. Pasteur 1173P2]                                          | 58 | 4  |
| gij121636183 | acyl-CoA synthetase [Mycobacterium bovis BCG str. Pasteur 1173P2]                                                | 58 | 7  |
| gij121637934 | putative polyketide synthase pks12 [Mycobacterium bovis BCG str. Pasteur 1173P2]                                 | 58 | 33 |
| gij121636076 | hypothetical protein BCG_0200 [Mycobacterium bovis BCG str. Pasteur 1173P2]                                      | 58 | 6  |
| gij121638763 | ribosome recycling factor [Mycobacterium bovis BCG str. Pasteur 1173P2]                                          | 58 | 12 |
| gij121637685 | hypothetical protein BCG_1816 [Mycobacterium bovis BCG str. Pasteur 1173P2]                                      | 57 | 22 |
| gij121636101 | dihydroxy-acid dehydratase [Mycobacterium bovis BCG str. Pasteur 1173P2]                                         | 57 | 8  |
| gij121638509 | putative transmembrane protein [Mycobacterium bovis BCG str. Pasteur 1173P2]                                     | 57 | 3  |
| gij121637784 | putative cytochrome p450 140 CYP140 [Mycobacterium bovis BCG str. Pasteur 1173P2]                                | 57 | 16 |
| gij121636088 | putative mce associated transmembrane protein [Mycobacterium bovis BCG str. Pasteur 1173P2]                      | 56 | 4  |
| gij121638743 | methionine aminopeptidase [Mycobacterium bovis BCG str. Pasteur 1173P2]                                          | 56 | 1  |
| gij121637732 | hypothetical protein BCG_1864 [Mycobacterium bovis BCG str. Pasteur 1173P2]                                      | 56 | 1  |

|              |                                                                                                                        |    |    |
|--------------|------------------------------------------------------------------------------------------------------------------------|----|----|
| gij121637466 | putative ketoacyl reductase [Mycobacterium bovis BCG str. Pasteur 1173P2]                                              | 55 | 5  |
| gij121639169 | putative propionyl-CoA carboxylase beta chain 5 accD5 [Mycobacterium bovis BCG str. Pasteur 1173P2]                    | 55 | 10 |
| gij121639512 | hypothetical protein BCG_3657 [Mycobacterium bovis BCG str. Pasteur 1173P2]                                            | 55 | 4  |
| gij121638933 | putative monooxygenase [Mycobacterium bovis BCG str. Pasteur 1173P2]                                                   | 55 | 11 |
| gij121638986 | putative cell division protein ftsX [Mycobacterium bovis BCG str. Pasteur 1173P2]                                      | 54 | 6  |
| gij121636267 | heat shock protein transcriptional regulator HspR [Mycobacterium bovis BCG str. Pasteur 1173P2]                        | 54 | 3  |
| gij121637407 | hypothetical protein BCG_1538 [Mycobacterium bovis BCG str. Pasteur 1173P2]                                            | 54 | 2  |
| gij121638351 | hypothetical protein BCG_2488c [Mycobacterium bovis BCG str. Pasteur 1173P2]                                           | 54 | 2  |
| gij121636128 | hypothetical protein BCG_0253 [Mycobacterium bovis BCG str. Pasteur 1173P2]                                            | 54 | 1  |
| gij121635965 | 30S ribosomal protein S18 [Mycobacterium bovis BCG str. Pasteur 1173P2]                                                | 54 | 2  |
| gij121638939 | hypothetical protein BCG_3079c [Mycobacterium bovis BCG str. Pasteur 1173P2]                                           | 53 | 1  |
| gij121637040 | hypothetical protein BCG_1169c [Mycobacterium bovis BCG str. Pasteur 1173P2]                                           | 53 | 2  |
| gij121639180 | AsnC family transcriptional regulator [Mycobacterium bovis BCG str. Pasteur 1173P2]                                    | 53 | 8  |
| gij121636247 | hypothetical protein BCG_0372 [Mycobacterium bovis BCG str. Pasteur 1173P2]                                            | 53 | 2  |
| gij121636895 | putative metal cation transporter P-type atpase ctpV [Mycobacterium bovis BCG str. Pasteur 1173P2]                     | 53 | 9  |
| gij121638467 | putative peptidyl-prolyl cis-trans isomerase B ppiB [Mycobacterium bovis BCG str. Pasteur 1173P2]                      | 52 | 4  |
| gij121639053 | hypothetical protein BCG_3193 [Mycobacterium bovis BCG str. Pasteur 1173P2]                                            | 52 | 5  |
| gij121638076 | putative Rieske iron-sulfur protein QcrA [Mycobacterium bovis BCG str. Pasteur 1173P2]                                 | 52 | 10 |
| gij121637091 | pterin-4-alpha-carbinolamine dehydratase [Mycobacterium bovis BCG str. Pasteur 1173P2]                                 | 52 | 2  |
| gij121638490 | hypothetical protein BCG_2628c [Mycobacterium bovis BCG str. Pasteur 1173P2]                                           | 51 | 5  |
| gij121636365 | putative membrane protein mmpS4 [Mycobacterium bovis BCG str. Pasteur 1173P2]                                          | 51 | 2  |
| gij121638776 | putative mycobactin utilization protein viuB [Mycobacterium bovis BCG str. Pasteur 1173P2]                             | 51 | 2  |
| gij121636385 | mycolic acid synthase pcaA [Mycobacterium bovis BCG str. Pasteur 1173P2]                                               | 51 | 7  |
| gij121638987 | putative cell division ATP-binding protein ftsE [Mycobacterium bovis BCG str. Pasteur 1173P2]                          | 50 | 5  |
| gij121638782 | hypothetical protein BCG_2922c [Mycobacterium bovis BCG str. Pasteur 1173P2]                                           | 50 | 2  |
| gij121638493 | pyridoxal biosynthesis lyase PdxS [Mycobacterium bovis BCG str. Pasteur 1173P2]                                        | 50 | 5  |
| gij121638135 | diacylglycerol kinase [Mycobacterium bovis BCG str. Pasteur 1173P2]                                                    | 50 | 1  |
| gij121639723 | phosphoribose diphosphate:decaprenyl-phosphate phosphoribosyltransferase [Mycobacterium bovis BCG str. Pasteur 1173P2] | 50 | 1  |
| gij121639378 | 30S ribosomal protein S4 [Mycobacterium bovis BCG str. Pasteur 1173P2]                                                 | 49 | 7  |
| gij121638585 | RNA polymerase sigma factor SigB [Mycobacterium bovis BCG str. Pasteur 1173P2]                                         | 49 | 13 |
| gij121639501 | 2-C-methyl-D-erythritol 2,4-cyclodiphosphate synthase [Mycobacterium bovis BCG str. Pasteur 1173P2]                    | 49 | 4  |
| gij121636912 | large-conductance mechanosensitive channel [Mycobacterium bovis BCG str. Pasteur 1173P2]                               | 49 | 3  |
| gij121639724 | putative transmembrane protein [Mycobacterium bovis BCG str. Pasteur 1173P2]                                           | 48 | 1  |
| gij121639523 | putative transmembrane protein rich in alanine and arginine and proline [Mycobacterium bovis BCG str. Pasteur 1173P2]  | 48 | 7  |
| gij121636222 | hypothetical protein BCG_0347c [Mycobacterium bovis BCG str. Pasteur 1173P2]                                           | 48 | 3  |
| gij121639614 | hypothetical protein BCG_3758 [Mycobacterium bovis BCG str. Pasteur 1173P2]                                            | 47 | 1  |
| gij121636223 | putative integral membrane protein [Mycobacterium bovis BCG str. Pasteur 1173P2]                                       | 47 | 6  |
| gij121638926 | putative phosphoserine phosphatase serB2 [Mycobacterium bovis BCG str. Pasteur 1173P2]                                 | 47 | 4  |
| gij121639535 | hypothetical protein BCG_3680c [Mycobacterium bovis BCG str. Pasteur 1173P2]                                           | 47 | 2  |
| gij121638252 | putative chaperone protein dnaJ2 [Mycobacterium bovis BCG str. Pasteur 1173P2]                                         | 47 | 5  |
| gij121638160 | putative dehydrogenase [Mycobacterium bovis BCG str. Pasteur 1173P2]                                                   | 47 | 3  |



|              |                                                                                                                                           |    |    |
|--------------|-------------------------------------------------------------------------------------------------------------------------------------------|----|----|
| gij121637639 | succinic semialdehyde dehydrogenase [Mycobacterium bovis BCG str. Pasteur 1173P2]                                                         | 46 | 6  |
| gij121636637 | 50S ribosomal protein L24 [Mycobacterium bovis BCG str. Pasteur 1173P2]                                                                   | 46 | 4  |
| gij121637377 | glucose-6-phosphate 1-dehydrogenase [Mycobacterium bovis BCG str. Pasteur 1173P2]                                                         | 46 | 2  |
| gij121638417 | transcription antitermination protein NusB [Mycobacterium bovis BCG str. Pasteur 1173P2]                                                  | 45 | 6  |
| gij121638868 | isopropylmalate isomerase small subunit [Mycobacterium bovis BCG str. Pasteur 1173P2]                                                     | 45 | 2  |
| gij121637992 | proteasome subunit beta PrcB [Mycobacterium bovis BCG str. Pasteur 1173P2]                                                                | 45 | 5  |
| gij121636944 | 50S ribosomal protein L25/general stress protein Ctc [Mycobacterium bovis BCG str. Pasteur 1173P2]                                        | 45 | 5  |
| gij121638092 | glycine cleavage system aminomethyltransferase T [Mycobacterium bovis BCG str. Pasteur 1173P2]                                            | 44 | 1  |
| gij121636652 | hypothetical protein BCG_0780 [Mycobacterium bovis BCG str. Pasteur 1173P2]                                                               | 44 | 8  |
| gij121638893 | aspartyl/glutamyl-tRNA amidotransferase subunit A [Mycobacterium bovis BCG str. Pasteur 1173P2]                                           | 43 | 5  |
| gij121638041 | hypothetical protein BCG_2176c [Mycobacterium bovis BCG str. Pasteur 1173P2]                                                              | 43 | 7  |
| gij121638331 | valyl-tRNA synthetase [Mycobacterium bovis BCG str. Pasteur 1173P2]                                                                       | 43 | 16 |
| gij121635888 | DNA gyrase subunit B [Mycobacterium bovis BCG str. Pasteur 1173P2]                                                                        | 42 | 15 |
| gij121637518 | indole-3-glycerol-phosphate synthase [Mycobacterium bovis BCG str. Pasteur 1173P2]                                                        | 42 | 8  |
| gij121639786 | hypothetical protein BCG_3931 [Mycobacterium bovis BCG str. Pasteur 1173P2]                                                               | 41 | 16 |
| gij121639559 | DNA topoisomerase I [Mycobacterium bovis BCG str. Pasteur 1173P2]                                                                         | 41 | 20 |
| gij121636198 | hypothetical protein BCG_0323 [Mycobacterium bovis BCG str. Pasteur 1173P2]                                                               | 41 | 5  |
| gij121636776 | putative pyruvate or indole-3-pyruvate decarboxylase pdc [Mycobacterium bovis BCG str. Pasteur 1173P2]                                    | 40 | 2  |
| gij121639190 | putative phosphate-transport system transcriptional regulatory protein phoU homolog 1 phoY1 [Mycobacterium bovis BCG str. Pasteur 1173P2] | 40 | 11 |
| gij121638120 | peroxiredoxin AhpE [Mycobacterium bovis BCG str. Pasteur 1173P2]                                                                          | 40 | 2  |
| gij121638415 | putative amino acid decarboxylase [Mycobacterium bovis BCG str. Pasteur 1173P2]                                                           | 40 | 8  |
| gij121638576 | putative extragenic suppressor protein suhB [Mycobacterium bovis BCG str. Pasteur 1173P2]                                                 | 39 | 6  |
| gij121639030 | NADH dehydrogenase subunit C [Mycobacterium bovis BCG str. Pasteur 1173P2]                                                                | 39 | 3  |
| gij121637420 | hypothetical protein BCG_1551 [Mycobacterium bovis BCG str. Pasteur 1173P2]                                                               | 39 | 1  |
| gij121636631 | 50S ribosomal protein L29 [Mycobacterium bovis BCG str. Pasteur 1173P2]                                                                   | 39 | 5  |
| gij121638885 | acetolactate synthase 1 catalytic subunit [Mycobacterium bovis BCG str. Pasteur 1173P2]                                                   | 39 | 5  |
| gij121638052 | hypothetical protein BCG_2187c [Mycobacterium bovis BCG str. Pasteur 1173P2]                                                              | 39 | 9  |
| gij121636444 | putative thioredoxin protein [Mycobacterium bovis BCG str. Pasteur 1173P2]                                                                | 39 | 3  |
| gij121639348 | alanine racemase [Mycobacterium bovis BCG str. Pasteur 1173P2]                                                                            | 39 | 7  |
| gij121639037 | NADH dehydrogenase subunit J [Mycobacterium bovis BCG str. Pasteur 1173P2]                                                                | 39 | 2  |
| gij121639098 | putative ATP-dependent RNA helicase rhlE [Mycobacterium bovis BCG str. Pasteur 1173P2]                                                    | 38 | 7  |
| gij121637037 | putative cholesterol dehydrogenase [Mycobacterium bovis BCG str. Pasteur 1173P2]                                                          | 38 | 7  |
| gij121639716 | putative propionyl-CoA carboxylase beta chain 4 accD4 [Mycobacterium bovis BCG str. Pasteur 1173P2]                                       | 38 | 6  |
| gij121637763 | alanine and proline rich secreted protein apa [Mycobacterium bovis BCG str. Pasteur 1173P2]                                               | 38 | 1  |
| gij121637778 | hypothetical protein BCG_1911 [Mycobacterium bovis BCG str. Pasteur 1173P2]                                                               | 37 | 3  |
| gij121637657 | putative integral membrane protein [Mycobacterium bovis BCG str. Pasteur 1173P2]                                                          | 37 | 6  |
| gij121637729 | glycine cleavage system protein H [Mycobacterium bovis BCG str. Pasteur 1173P2]                                                           | 37 | 3  |
| gij121637946 | hypothetical protein BCG_2080c [Mycobacterium bovis BCG str. Pasteur 1173P2]                                                              | 37 | 2  |
| gij121636301 | phosphoribosylglycinamide formyltransferase 2 [Mycobacterium bovis BCG str. Pasteur 1173P2]                                               | 36 | 7  |
| gij121639721 | secreted antigen 85-A fbpA [Mycobacterium bovis BCG str. Pasteur 1173P2]                                                                  | 36 | 4  |
| gij121638848 | pyruvate carboxylase [Mycobacterium bovis BCG str. Pasteur 1173P2]                                                                        | 36 | 9  |

|              |                                                                                                                                        |    |    |
|--------------|----------------------------------------------------------------------------------------------------------------------------------------|----|----|
| gij121636184 | putative acyl-CoA dehydrogenase fadE6 [Mycobacterium bovis BCG str. Pasteur 1173P2]                                                    | 36 | 7  |
| gij121637646 | hypothetical protein BCG_1777 [Mycobacterium bovis BCG str. Pasteur 1173P2]                                                            | 36 | 2  |
| gij121639533 | hypothetical protein BCG_3678c [Mycobacterium bovis BCG str. Pasteur 1173P2]                                                           | 35 | 3  |
| gij121636417 | pyrroline-5-carboxylate reductase [Mycobacterium bovis BCG str. Pasteur 1173P2]                                                        | 35 | 10 |
| gij121637015 | Short (C15) chain Z-isoprenyl diphosphate synthase [Mycobacterium bovis BCG str. Pasteur 1173P2]                                       | 35 | 3  |
| gij121639283 | putative bifunctional protein fold: methylenetetrahydrofolate dehydrogenase + methenyltetrahydrofolate cyclohydrolase [Mycobacterium t | 34 | 3  |
| gij121636466 | naphthoate synthase [Mycobacterium bovis BCG str. Pasteur 1173P2]                                                                      | 34 | 5  |
| gij121639146 | phosphomannomutase/phosphoglucomutase [Mycobacterium bovis BCG str. Pasteur 1173P2]                                                    | 34 | 10 |
| gij121637913 | histidine kinase response regulator [Mycobacterium bovis BCG str. Pasteur 1173P2]                                                      | 33 | 12 |
| gij121637391 | hypothetical protein BCG_1522 [Mycobacterium bovis BCG str. Pasteur 1173P2]                                                            | 33 | 12 |
| gij121636073 | putative oxidoreductase [Mycobacterium bovis BCG str. Pasteur 1173P2]                                                                  | 33 | 6  |
| gij121637910 | hypothetical protein BCG_2043c [Mycobacterium bovis BCG str. Pasteur 1173P2]                                                           | 33 | 21 |
| gij121639800 | hypothetical protein BCG_3945c [Mycobacterium bovis BCG str. Pasteur 1173P2]                                                           | 33 | 9  |
| gij121638547 | putative secreted protease [Mycobacterium bovis BCG str. Pasteur 1173P2]                                                               | 32 | 10 |
| gij121639019 | PPE family protein [Mycobacterium bovis BCG str. Pasteur 1173P2]                                                                       | 32 | 12 |
| gij121637536 | DNA polymerase I [Mycobacterium bovis BCG str. Pasteur 1173P2]                                                                         | 32 | 18 |
| gij121636150 | <b>putative lipoprotein lppQ [Mycobacterium bovis BCG str. Pasteur 1173P2]</b>                                                         | 32 | 9  |
| gij121639637 | DNA polymerase III subunits gamma and tau [Mycobacterium bovis BCG str. Pasteur 1173P2]                                                | 32 | 6  |
| gij121636921 | putative molybdopterin biosynthesis protein moeA1 [Mycobacterium bovis BCG str. Pasteur 1173P2]                                        | 32 | 8  |
| gij121638378 | putative pyruvate dehydrogenase E1 component subunit beta pdhB [Mycobacterium bovis BCG str. Pasteur 1173P2]                           | 31 | 3  |
| gij121636296 | putative secreted protein [Mycobacterium bovis BCG str. Pasteur 1173P2]                                                                | 31 | 9  |
| gij121639493 | putative acyl-CoA dehydrogenase fadE34 [Mycobacterium bovis BCG str. Pasteur 1173P2]                                                   | 31 | 8  |
| gij121638768 | putative transcriptional regulatory protein [Mycobacterium bovis BCG str. Pasteur 1173P2]                                              | 31 | 11 |
| gij121638819 | putative daunorubicin-DIM-transport integral membrane protein ABC transporter drrB [Mycobacterium bovis BCG str. Pasteur 1173P2]       | 31 | 2  |
| gij121637723 | hypothetical protein BCG_1855 [Mycobacterium bovis BCG str. Pasteur 1173P2]                                                            | 31 | 3  |
| gij121638839 | putative glycosyl transferase [Mycobacterium bovis BCG str. Pasteur 1173P2]                                                            | 31 | 3  |
| gij121637464 | putative fatty acyl-CoA reductase [Mycobacterium bovis BCG str. Pasteur 1173P2]                                                        | 31 | 7  |
| gij121639495 | Lacl family transcriptional regulator [Mycobacterium bovis BCG str. Pasteur 1173P2]                                                    | 31 | 7  |
| gij121638320 | NAD synthetase [Mycobacterium bovis BCG str. Pasteur 1173P2]                                                                           | 30 | 17 |
| gij121638175 | putative aminotransferase [Mycobacterium bovis BCG str. Pasteur 1173P2]                                                                | 30 | 5  |
| gij121638455 | hypothetical protein BCG_2593 [Mycobacterium bovis BCG str. Pasteur 1173P2]                                                            | 30 | 4  |
| gij121636061 | putative quinone oxidoreductase [Mycobacterium bovis BCG str. Pasteur 1173P2]                                                          | 30 | 3  |
| gij121637771 | hypothetical protein BCG_1904 [Mycobacterium bovis BCG str. Pasteur 1173P2]                                                            | 30 | 7  |
| gij121638827 | <b>putative lipoprotein lppX [Mycobacterium bovis BCG str. Pasteur 1173P2]</b>                                                         | 30 | 4  |
| gij121637655 | putative transmembrane ATP-binding protein ABC transporter [Mycobacterium bovis BCG str. Pasteur 1173P2]                               | 29 | 12 |
| gij121636312 | putative acyl-CoA dehydrogenase fadE7 [Mycobacterium bovis BCG str. Pasteur 1173P2]                                                    | 29 | 8  |
| gij121638836 | hypothetical protein BCG_2976c [Mycobacterium bovis BCG str. Pasteur 1173P2]                                                           | 29 | 4  |
| gij121637056 | putative epoxide hydrolase ephC [Mycobacterium bovis BCG str. Pasteur 1173P2]                                                          | 29 | 6  |
| gij121636397 | hypothetical protein BCG_0522c [Mycobacterium bovis BCG str. Pasteur 1173P2]                                                           | 29 | 2  |
| gij121636369 | hypothetical protein BCG_0494c [Mycobacterium bovis BCG str. Pasteur 1173P2]                                                           | 29 | 1  |
| gij121636102 | hypothetical protein BCG_0227 [Mycobacterium bovis BCG str. Pasteur 1173P2]                                                            | 29 | 7  |

|              |                                                                                                           |    |    |
|--------------|-----------------------------------------------------------------------------------------------------------|----|----|
| gij121636372 | putative peptidase [Mycobacterium bovis BCG str. Pasteur 1173P2]                                          | 29 | 16 |
| gij121636014 | putative peptide synthetase nrp [Mycobacterium bovis BCG str. Pasteur 1173P2]                             | 29 | 16 |
| gij121636568 | hypothetical protein BCG_0696c [Mycobacterium bovis BCG str. Pasteur 1173P2]                              | 29 | 13 |
| gij121638111 | bifunctional RNase H/acid phosphatase [Mycobacterium bovis BCG str. Pasteur 1173P2]                       | 29 | 6  |
| gij121638218 | hypothetical protein BCG_2353 [Mycobacterium bovis BCG str. Pasteur 1173P2]                               | 29 | 6  |
| gij121636636 | 50S ribosomal protein L14 [Mycobacterium bovis BCG str. Pasteur 1173P2]                                   | 28 | 5  |
| gij121637506 | histidinol dehydrogenase [Mycobacterium bovis BCG str. Pasteur 1173P2]                                    | 28 | 4  |
| gij121639771 | ribonuclease activity regulator protein RraA [Mycobacterium bovis BCG str. Pasteur 1173P2]                | 28 | 2  |
| gij121636920 | putative UTP--glucose-1-phosphate uridylyltransferase galU [Mycobacterium bovis BCG str. Pasteur 1173P2]  | 28 | 5  |
| gij121639357 | glucosamine--fructose-6-phosphate aminotransferase [Mycobacterium bovis BCG str. Pasteur 1173P2]          | 28 | 3  |
| gij121638032 | cell division protein FtsZ [Mycobacterium bovis BCG str. Pasteur 1173P2]                                  | 28 | 5  |
| gij121638802 | putative cell division protein ftsY [Mycobacterium bovis BCG str. Pasteur 1173P2]                         | 28 | 8  |
| gij121639179 | L-lysine aminotransferase [Mycobacterium bovis BCG str. Pasteur 1173P2]                                   | 28 | 7  |
| gij121636874 | putative ATP dependent DNA helicase uvrD1 [Mycobacterium bovis BCG str. Pasteur 1173P2]                   | 28 | 12 |
| gij121637357 | acyl-CoA synthetase [Mycobacterium bovis BCG str. Pasteur 1173P2]                                         | 28 | 6  |
| gij121636415 | hypothetical protein BCG_0540 [Mycobacterium bovis BCG str. Pasteur 1173P2]                               | 28 | 2  |
| gij121635970 | hypothetical protein BCG_0091 [Mycobacterium bovis BCG str. Pasteur 1173P2]                               | 27 | 6  |
| gij121638340 | ATP-dependent protease ATP-binding subunit ClpX [Mycobacterium bovis BCG str. Pasteur 1173P2]             | 27 | 5  |
| gij121636495 | hypothetical protein BCG_0622 [Mycobacterium bovis BCG str. Pasteur 1173P2]                               | 27 | 1  |
| gij121636812 | citrate synthase 2 [Mycobacterium bovis BCG str. Pasteur 1173P2]                                          | 27 | 7  |
| gij121638462 | hypothetical protein BCG_2600 [Mycobacterium bovis BCG str. Pasteur 1173P2]                               | 27 | 8  |
| gij121636655 | adenylate kinase [Mycobacterium bovis BCG str. Pasteur 1173P2]                                            | 27 | 6  |
| gij121637093 | putative respiratory nitrate reductase (alpha chain) narG [Mycobacterium bovis BCG str. Pasteur 1173P2]   | 27 | 13 |
| gij121637450 | acyl-CoA synthetase [Mycobacterium bovis BCG str. Pasteur 1173P2]                                         | 27 | 7  |
| gij121637566 | argininosuccinate synthase [Mycobacterium bovis BCG str. Pasteur 1173P2]                                  | 27 | 3  |
| gij121636747 | putative transcriptional regulatory protein [Mycobacterium bovis BCG str. Pasteur 1173P2]                 | 27 | 5  |
| gij121639474 | hypothetical protein BCG_3619c [Mycobacterium bovis BCG str. Pasteur 1173P2]                              | 26 | 2  |
| gij121639086 | putative ATP-dependent DNA helicase [Mycobacterium bovis BCG str. Pasteur 1173P2]                         | 26 | 24 |
| gij121636075 | hypothetical protein BCG_0199 [Mycobacterium bovis BCG str. Pasteur 1173P2]                               | 26 | 2  |
| gij121638210 | AsnC family transcriptional regulator [Mycobacterium bovis BCG str. Pasteur 1173P2]                       | 26 | 6  |
| gij121636960 | potassium-transporting ATPase subunit B [Mycobacterium bovis BCG str. Pasteur 1173P2]                     | 26 | 7  |
| gij121637372 | putative biotin sulfoxide reductase bisC [Mycobacterium bovis BCG str. Pasteur 1173P2]                    | 26 | 12 |
| gij121638553 | uroporphyrinogen decarboxylase [Mycobacterium bovis BCG str. Pasteur 1173P2]                              | 26 | 3  |
| gij121638212 | putative transmembrane ATP-binding protein ABC transporter [Mycobacterium bovis BCG str. Pasteur 1173P2]  | 26 | 11 |
| gij121638816 | phenolphthiocerol synthesis type-I polyketide synthase ppsD [Mycobacterium bovis BCG str. Pasteur 1173P2] | 26 | 27 |
| gij121639628 | putative ligase [Mycobacterium bovis BCG str. Pasteur 1173P2]                                             | 26 | 8  |
| gij121636389 | putative transmembrane protein [Mycobacterium bovis BCG str. Pasteur 1173P2]                              | 26 | 26 |
| gij121636266 | putative chaperone protein dnaJ1 [Mycobacterium bovis BCG str. Pasteur 1173P2]                            | 26 | 11 |
| gij121639153 | putative mannose-1-phosphate guanyltransferase manC [Mycobacterium bovis BCG str. Pasteur 1173P2]         | 26 | 6  |
| gij121639261 | hypothetical protein BCG_3403c [Mycobacterium bovis BCG str. Pasteur 1173P2]                              | 26 | 7  |
| gij121636705 | putative protease II ptrB (oligopeptidase B) [Mycobacterium bovis BCG str. Pasteur 1173P2]                | 26 | 8  |

|              |                                                                                                       |    |    |
|--------------|-------------------------------------------------------------------------------------------------------|----|----|
| gij121636743 | hypothetical protein BCG_0871 [Mycobacterium bovis BCG str. Pasteur 1173P2]                           | 26 | 4  |
| gij121636596 | enoyl-CoA hydratase [Mycobacterium bovis BCG str. Pasteur 1173P2]                                     | 26 | 18 |
| gij121637515 | putative peroxidoxin bcpB [Mycobacterium bovis BCG str. Pasteur 1173P2]                               | 25 | 5  |
| gij121637521 | <b>prolipoprotein diacylglyceryl transferase [Mycobacterium bovis BCG str. Pasteur 1173P2]</b>        | 25 | 6  |
| gij121637937 | polyprenol-monophosphomannose synthase Ppm1 [Mycobacterium bovis BCG str. Pasteur 1173P2]             | 25 | 12 |
| gij121639077 | hypothetical protein BCG_3217 [Mycobacterium bovis BCG str. Pasteur 1173P2]                           | 25 | 3  |
| gij121637802 | hypothetical protein BCG_1935c [Mycobacterium bovis BCG str. Pasteur 1173P2]                          | 25 | 12 |
| gij121639421 | 3-ketoacyl-(acyl-carrier-protein) reductase [Mycobacterium bovis BCG str. Pasteur 1173P2]             | 25 | 9  |
| gij121636742 | transcriptional regulatory protein [Mycobacterium bovis BCG str. Pasteur 1173P2]                      | 25 | 2  |
| gij121637709 | PPE family protein [Mycobacterium bovis BCG str. Pasteur 1173P2]                                      | 25 | 8  |
| gij121637507 | histidinol-phosphate aminotransferase [Mycobacterium bovis BCG str. Pasteur 1173P2]                   | 25 | 6  |
| gij121638473 | preprotein translocase subunit YajC [Mycobacterium bovis BCG str. Pasteur 1173P2]                     | 25 | 1  |
| gij121639159 | putative metal cation-transporting P-type atpase C ctpC [Mycobacterium bovis BCG str. Pasteur 1173P2] | 25 | 10 |
| gij121638628 | 3-ketoacyl-(acyl-carrier-protein) reductase [Mycobacterium bovis BCG str. Pasteur 1173P2]             | 25 | 3  |
| gij121637681 | hypothetical protein BCG_1812c [Mycobacterium bovis BCG str. Pasteur 1173P2]                          | 25 | 8  |
| gij121636930 | arginine deiminase [Mycobacterium bovis BCG str. Pasteur 1173P2]                                      | 24 | 10 |
| gij121636792 | molybdenum cofactor biosynthesis protein A [Mycobacterium bovis BCG str. Pasteur 1173P2]              | 24 | 10 |
| gij121636345 | putative tuberculin related peptide [Mycobacterium bovis BCG str. Pasteur 1173P2]                     | 23 | 4  |
| gij121636100 | putative transmembrane protein [Mycobacterium bovis BCG str. Pasteur 1173P2]                          | 23 | 1  |
| gij121639756 | prephenate dehydratase [Mycobacterium bovis BCG str. Pasteur 1173P2]                                  | 22 | 4  |
| gij121639725 | galactofuranosyl transferase [Mycobacterium bovis BCG str. Pasteur 1173P2]                            | 22 | 5  |
| gij121639712 | integral membrane indolylacetyltransferase embB [Mycobacterium bovis BCG str. Pasteur 1173P2]         | 22 | 8  |
| gij121639521 | pantoate--beta-alanine ligase [Mycobacterium bovis BCG str. Pasteur 1173P2]                           | 21 | 6  |
| gij121637235 | F0F1 ATP synthase subunit B [Mycobacterium bovis BCG str. Pasteur 1173P2]                             | 18 | 8  |
| gij121636485 | putative methyltransferase/methylase [Mycobacterium bovis BCG str. Pasteur 1173P2]                    | 18 | 11 |

---

**Supporting Table 5. *M. tuberculosis* H37Rv cellular proteins**

| Accession number | Protein name                                                                                                    | Score | Unique peptides |
|------------------|-----------------------------------------------------------------------------------------------------------------|-------|-----------------|
| gij1806151       | PROBABLE IRON-REGULATED ELONGATION FACTOR TU TUF (EF-TU) [Mycobacterium tuberculosis H37Rv]                     | 2181  | 78              |
| gij2104319       | CONSERVED HYPOTHETICAL PROTEIN [Mycobacterium tuberculosis H37Rv]                                               | 2047  | 66              |
| gij2094829       | PROBABLE CHAPERONE PROTEIN DNAK (HEAT SHOCK PROTEIN 70) (HEAT SHOCK 70 KDA PROTEIN) (HSP70) [Mycobac            | 1921  | 77              |
| gij3261680       | POSSIBLE L-LACTATE DEHYDROGENASE (CYTOCHROME) LLDD2 [Mycobacterium tuberculosis H37Rv]                          | 1611  | 64              |
| gij2117227       | PROBABLE 5-METHYLTETRAHYDROPTEROYLTRIGLUTAMATE--HOMOCYSTEINE METHYLTRANSFERASE METE (methioni                   | 1460  | 55              |
| gij1449370       | 60 KDA CHAPERONIN 1 GROEL1 (PROTEIN CPN60-1) (GROEL PROTEIN 1) [Mycobacterium tuberculosis H37Rv]               | 1445  | 47              |
| gij3261568       | GLUTAMINE SYNTHETASE GLNA1 (GLUTAMINE SYNTHASE) (GS-I) [Mycobacterium tuberculosis H37Rv]                       | 1277  | 34              |
| gij2143292       | DNA-DIRECTED RNA POLYMERASE (BETA~ CHAIN) RPOC (TRANSCRIPTASE BETA~ CHAIN) (RNA POLYMERASE BETA~ :              | 1133  | 40              |
| gij1877273       | PROBABLE SHORT-CHAIN TYPE DEHYDROGENASE/REDUCTASE [Mycobacterium tuberculosis H37Rv]                            | 1027  | 18              |
| gij41353447      | CONSERVED 35 KDA ALANINE RICH PROTEIN [Mycobacterium tuberculosis H37Rv]                                        | 975   | 26              |
| gij1322432       | PROBABLE ATP SYNTHASE ALPHA CHAIN ATPA [Mycobacterium tuberculosis H37Rv]                                       | 958   | 42              |
| gij1322434       | PROBABLE ATP SYNTHASE BETA CHAIN ATPD [Mycobacterium tuberculosis H37Rv]                                        | 878   | 36              |
| gij2225952       | CATALASE-PEROXIDASE-PEROXYNITRITASE T KATG [Mycobacterium tuberculosis H37Rv]                                   | 867   | 36              |
| gij2224820       | PROBABLE POLYKETIDE SYNTHASE PKS2 [Mycobacterium tuberculosis H37Rv]                                            | 849   | 44              |
| gij1261947       | 3-OXOACYL-[ACYL-CARRIER PROTEIN] SYNTHASE 1 KASA (BETA-KETOACYL-ACP SYNTHASE) (KAS I) [Mycobacterium tub        | 842   | 19              |
| gij2909473       | POSSIBLE CONSERVED MEMBRANE PROTEIN [Mycobacterium tuberculosis H37Rv]                                          | 830   | 41              |
| gij2950419       | POLYKETIDE SYNTHASE PKS13 [Mycobacterium tuberculosis H37Rv]                                                    | 787   | 58              |
| gij3261686       | PROBABLE FATTY ACID SYNTHASE FAS (FATTY ACID SYNTHETASE) [Mycobacterium tuberculosis H37Rv]                     | 769   | 47              |
| gij2791626       | PROBABLE ELECTRON TRANSFER FLAVOPROTEIN (ALPHA-SUBUNIT) FIXB (ALPHA-ETF) (ELECTRON TRANSFER FLAVO               | 760   | 24              |
| gij1781116       | POSSIBLE BACTERIOFERRITIN BFRB [Mycobacterium tuberculosis H37Rv]                                               | 754   | 25              |
| gij2104333       | CONSERVED HYPOTHETICAL PROTEIN WAG31 [Mycobacterium tuberculosis H37Rv]                                         | 740   | 25              |
| gij2695965       | PROBABLE POLYKETIDE BETA-KETOACYL SYNTHASE PKS4 [Mycobacterium tuberculosis H37Rv]                              | 730   | 35              |
| gij2104380       | PROBABLE DNA-DIRECTED RNA POLYMERASE (ALPHA CHAIN) RPOA (TRANSCRIPTASE ALPHA CHAIN) (RNA POLYMER,               | 698   | 17              |
| gij2950420       | PROBABLE FATTY-ACID-CoA LIGASE FADD32 (FATTY-ACID-CoA SYNTHETASE) (FATTY-ACID-CoA SYNTHASE [Mycobacte           | 689   | 30              |
| gij1877340       | PROBABLE BIFUNCTIONAL PROTEIN ACETYL-/PROPIONYL-COENZYME A CARBOXYLASE (ALPHA CHAIN) ACCA3: BIOTIN              | 641   | 21              |
| gij2791409       | PROBABLE IRON-REGULATED ACONITATE HYDRATASE ACN (Citrate hydro-lyase) (Aconitase) [Mycobacterium tuberculosis H | 637   | 20              |
| gij2131060       | PROBABLE GLYCERALDEHYDE 3-PHOSPHATE DEHYDROGENASE GAP (GAPDH) [Mycobacterium tuberculosis H37Rv]                | 632   | 16              |
| gij2916889       | CONSERVED HYPOTHETICAL PROTEIN [Mycobacterium tuberculosis H37Rv]                                               | 616   | 18              |
| gij1694845       | PROBABLE DNA-BINDING PROTEIN HU HOMOLOG HUPB (HISTONE-LIKE PROTEIN) (HLP) (21-KDA LAMININ-2-BINDING PF          | 610   | 24              |
| gij2909446       | PROBABLE 3-OXOACYL-[ACYL-CARRIER PROTEIN] REDUCTASE FABG4 (3-KETOACYL-ACYL CARRIER PROTEIN REDUC                | 608   | 21              |
| gij1552563       | PROBABLE IRON-REGULATED PEPTIDYL-PROLYL CIS-TRANS ISOMERASE A PPIA (PPIase A) (ROTAMASE A) [Mycobacter          | 599   | 12              |
| gij1449273       | IRON-REGULATED HEPARIN BINDING HEMAGGLUTININ HBHA (ADHESIN) [Mycobacterium tuberculosis H37Rv]                  | 597   | 15              |
| gij41353623      | <b>PERIPLASMIC PHOSPHATE-BINDING LIPOPROTEIN PSTS1 (PBP-1) (PSTS1) [Mycobacterium tuberculosis H37Rv]</b>       | 595   | 14              |
| gij2094844       | PROBABLE FRUCTOSE-BISPHOSPHATE ALDOLASE FBA [Mycobacterium tuberculosis H37Rv]                                  | 589   | 17              |
| gij2791627       | PROBABLE ELECTRON TRANSFER FLAVOPROTEIN (BETA-SUBUNIT) FIXA (BETA-ETF) (ELECTRON TRANSFER FLAVOPR               | 582   | 13              |
| gij2916918       | POSSIBLE ACYL-CoA THIOLASE FADA [Mycobacterium tuberculosis H37Rv]                                              | 555   | 15              |

|             |                                                                                                              |     |    |
|-------------|--------------------------------------------------------------------------------------------------------------|-----|----|
| gij2960187  | <b>19 KDA LIPOPROTEIN ANTIGEN PRECURSOR LPQH [Mycobacterium tuberculosis H37Rv]</b>                          | 545 | 9  |
| gij38490389 | 6 KDA EARLY SECRETORY ANTIGENIC TARGET ESXA (ESAT-6) [Mycobacterium tuberculosis H37Rv]                      | 542 | 7  |
| gij1449302  | CYCLOPROPANE-FATTY-ACYL-PHOSPHOLIPID SYNTHASE 2 CMAA2 (CYCLOPROPANE FATTY ACID SYNTHASE) (CFA S)             | 541 | 19 |
| gij1314035  | PROBABLE CITRATE SYNTHASE I GLTA2 [Mycobacterium tuberculosis H37Rv]                                         | 532 | 16 |
| gij2960100  | PROBABLE TRANSCRIPTIONAL REGULATORY PROTEIN (PROBABLY CRP/FNR-FAMILY) [Mycobacterium tuberculosis H37Rv]     | 525 | 17 |
| gij2909481  | PROBABLE CONSERVED TRANSMEMBRANE PROTEIN [Mycobacterium tuberculosis H37Rv]                                  | 504 | 20 |
| gij2143293  | DNA-DIRECTED RNA POLYMERASE (BETA CHAIN) RPOB (TRANSCRIPTASE BETA CHAIN) (RNA POLYMERASE BETA SUB            | 482 | 39 |
| gij2225974  | SECRETED ANTIGEN 85-B FBPB (85B) (ANTIGEN 85 COMPLEX B) (MYCOLYL TRANSFERASE 85B) (FIBRONECTIN-BINDIN        | 458 | 14 |
| gij2072715  | PROBABLE ADENOSYLHOMOCYSTEINASE SAHH (S-ADENOSYL-L-HOMOCYSTEINE HYDROLASE) (ADOHCYASE) [Mycobac              | 450 | 17 |
| gij2104288  | CONSERVED HYPOTHETICAL PROTEIN TB31.7 [Mycobacterium tuberculosis H37Rv]                                     | 434 | 17 |
| gij3261676  | PROBABLE MULTIFUNCTIONAL MYCOCEROSIC ACID SYNTHASE MEMBRANE-ASSOCIATED MAS [Mycobacterium tubercul           | 430 | 39 |
| gij1524210  | PROBABLE SUCCINYL-CoA SYNTHETASE (ALPHA CHAIN) SUCD (SCS-ALPHA) [Mycobacterium tuberculosis H37Rv]           | 427 | 16 |
| gij1403402  | RIBOSOME RECYCLING FACTOR FRR (RIBOSOME RELEASING FACTOR) (RRF) [Mycobacterium tuberculosis H37Rv]           | 416 | 18 |
| gij1552559  | DNA GYRASE (SUBUNIT A) GYRA (DNA TOPOISOMERASE (ATP-HYDROLYSING)) (DNA TOPOISOMERASE II) (TYPE II DNA        | 413 | 15 |
| gij38490278 | PROBABLE TRANSCRIPTIONAL REGULATORY PROTEIN MOXR1 [Mycobacterium tuberculosis H37Rv]                         | 409 | 12 |
| gij1648889  | PROBABLE ENOYL-CoA HYDRATASE ECHA16 (ENOYL HYDRASE) (UNSATURATED ACYL-CoA HYDRATASE) (CROTONASI              | 388 | 12 |
| gij2113914  | PROBABLE RIBOSOMAL PROTEIN S1 RPSA [Mycobacterium tuberculosis H37Rv]                                        | 381 | 26 |
| gij2896731  | POSSIBLE ACYL-[ACYL-CARRIER PROTEIN] DESATURASE DESA2 (ACYL-[ACP] DESATURASE) (STEAROYL-ACP DESATU           | 380 | 14 |
| gij2909472  | POSSIBLE CONSERVED MEMBRANE PROTEIN [Mycobacterium tuberculosis H37Rv]                                       | 379 | 16 |
| gij1449324  | Probable haloalkane dehalogenase [Mycobacterium tuberculosis H37Rv]                                          | 379 | 17 |
| gij41353706 | PROBABLE ATP-DEPENDENT CLP PROTEASE PROTEOLYTIC SUBUNIT 1 CLPP1 (ENDOPEPTIDASE CLP) [Mycobacterium t         | 375 | 14 |
| gij2695834  | PROBABLE 2-OXOGLUTARATE DEHYDROGENASE SUCA (Alpha-ketoglutarate dehydrogenase) [Mycobacterium tuberculosi    | 375 | 24 |
| gij2896711  | PROBABLE BETA-KETOACYL CoA THIOLASE FADA3 [Mycobacterium tuberculosis H37Rv]                                 | 374 | 17 |
| gij3256013  | PROBABLE S-ADENOSYLMETHIONINE SYNTHETASE METK (MAT) (AdoMet synthetase) (Methionine adenosyltransferase) [My | 372 | 14 |
| gij41352771 | PROBABLE D-3-PHOSPHOGLYCERATE DEHYDROGENASE SERA1 (PGDH) [Mycobacterium tuberculosis H37Rv]                  | 362 | 16 |
| gij1870005  | PROBABLE ENOLASE ENO [Mycobacterium tuberculosis H37Rv]                                                      | 359 | 15 |
| gij2911007  | PROBABLE ADENYLATE KINASE ADK (ATP-AMP TRANSPHOSPHORYLASE) [Mycobacterium tuberculosis H37Rv]                | 358 | 13 |
| gij1781110  | SUPEROXIDE DISMUTASE [FE] SODA [Mycobacterium tuberculosis H37Rv]                                            | 356 | 18 |
| gij2909471  | CONSERVED HYPOTHETICAL PROTEIN [Mycobacterium tuberculosis H37Rv]                                            | 355 | 24 |
| gij3261551  | PROBABLE ACYL-CoA DEHYDROGENASE FADE10 [Mycobacterium tuberculosis H37Rv]                                    | 349 | 18 |
| gij1850115  | PROBABLE FATTY-ACID-CoA LIGASE FADD2 (FATTY-ACID-CoA SYNTHETASE) (FATTY-ACID-CoA SYNTHASE) [Mycobacter       | 339 | 19 |
| gij2695826  | PROBABLE MALATE DEHYDROGENASE MDH [Mycobacterium tuberculosis H37Rv]                                         | 330 | 14 |
| gij1403410  | PROBABLE ELONGATION FACTOR TSF (EF-TS) [Mycobacterium tuberculosis H37Rv]                                    | 318 | 13 |
| gij1524234  | POSSIBLE EXPORTED CONSERVED PROTEIN [Mycobacterium tuberculosis H37Rv]                                       | 316 | 24 |
| gij2076692  | PROBABLE THIOSULFATE SULFURTRANSFERASE CYSA3 (RHODANESE-LIKE PROTEIN) (THIOSULFATE CYANIDE TRANS             | 311 | 16 |
| gij1524230  | NADH-DEPENDENT ENOYL-[ACYL-CARRIER-PROTEIN] REDUCTASE INHA (NADH-DEPENDENT ENOYL-ACP REDUCTASE)              | 308 | 11 |
| gij2896715  | Probable Proline-rich antigen homolog pra [Mycobacterium tuberculosis H37Rv]                                 | 307 | 10 |
| gij2909636  | CONSERVED HYPOTHETICAL PROTEIN TB27.3 [Mycobacterium tuberculosis H37Rv]                                     | 307 | 5  |
| gij2791516  | PROBABLE NAD-DEPENDENT GLUTAMATE DEHYDROGENASE GDH (NAD-GDH) (NAD-DEPENDENT GLUTAMIC DEHYDR                  | 304 | 29 |
| gij2924475  | CONSERVED HYPOTHETICAL PROTEIN [Mycobacterium tuberculosis H37Rv]                                            | 294 | 7  |
| gij2909447  | PROBABLE ACETYL-CoA ACYLTRANSFERASE FADA2 (3-KETOACYL-CoA THIOLASE) (BETA-KETOTHIOLASE) [Mycobacteri         | 291 | 6  |

|             |                                                                                                                  |     |    |
|-------------|------------------------------------------------------------------------------------------------------------------|-----|----|
| gij2078052  | TRANSMEMBRANE SERINE/THREONINE-PROTEIN KINASE D PKND (PROTEIN KINASE D) (STPK D) [Mycobacterium tubercu          | 291 | 12 |
| gij1694860  | PROBABLE OXIDOREDUCTASE [Mycobacterium tuberculosis H37Rv]                                                       | 290 | 9  |
| gij2916919  | PROBABLE FATTY OXIDATION PROTEIN FADB [Mycobacterium tuberculosis H37Rv]                                         | 289 | 14 |
| gij1449369  | 10 KDA CHAPERONIN GROES (PROTEIN CPN10) (PROTEIN GROES) (BCG-A HEAT SHOCK PROTEIN) (10 KDA ANTIGEN) [            | 287 | 14 |
| gij1877369  | PROBABLE ENOYL-CoA HYDRATASE ECHA3 (ENOYL HYDRASE) (UNSATURATED ACYL-CoA HYDRATASE) (CROTONASE                   | 285 | 15 |
| gij1877272  | PROBABLE ALDEHYDE DEHYDROGENASE (NAD+) DEPENDENT [Mycobacterium tuberculosis H37Rv]                              | 280 | 13 |
| gij1261943  | Probable pyruvate dehydrogenase E1 component aceE (PYRUVATE DECARBOXYLASE) (PYRUVATE DEHYDROGENASE) (PY          | 273 | 12 |
| gij2072661  | POSSIBLE IRON-REGULATED SHORT-CHAIN DEHYDROGENASE/REDUCTASE [Mycobacterium tuberculosis H37Rv]                   | 267 | 15 |
| gij1877382  | METHOXY MYCOLIC ACID SYNTHASE 2 MMAA2 (METHYL MYCOLIC ACID SYNTHASE 2) (MMA2) (HYDROXY MYCOLIC ACI               | 267 | 7  |
| gij2911107  | Probable long-chain-fatty-acid-CoA ligase fadD15 (FATTY-ACID-CoA SYNTHETASE) (FATTY-ACID-CoA SYNTHASE) [Mycobact | 252 | 11 |
| gij38490383 | SECRETED MPT51/MPB51 ANTIGEN PROTEIN FBPD (MPT51/MPB51 ANTIGEN 85 COMPLEX C) (AG58C) (MYCOLYL TRAN               | 252 | 6  |
| gij1877389  | PROBABLE 50S RIBOSOMAL PROTEIN L10 RPLJ [Mycobacterium tuberculosis H37Rv]                                       | 251 | 7  |
| gij2131048  | PROBABLE TRANSALDOLASE TAL [Mycobacterium tuberculosis H37Rv]                                                    | 248 | 14 |
| gij2076674  | CONSERVED HYPOTHETICAL PROTEIN [Mycobacterium tuberculosis H37Rv]                                                | 248 | 5  |
| gij41352812 | PROBABLE ATP-DEPENDENT PROTEASE ATP-BINDING SUBUNIT CLPC1 [Mycobacterium tuberculosis H37Rv]                     | 248 | 27 |
| gij1449340  | Probable dehydrogenase [Mycobacterium tuberculosis H37Rv]                                                        | 247 | 5  |
| gij1322433  | PROBABLE ATP SYNTHASE GAMMA CHAIN ATPG [Mycobacterium tuberculosis H37Rv]                                        | 246 | 12 |
| gij3256016  | <b>PROBABLE CONSERVED LIPOPROTEIN LPRG [Mycobacterium tuberculosis H37Rv]</b>                                    | 246 | 6  |
| gij2094830  | PROBABLE GRPE PROTEIN (HSP-70 COFACTOR) [Mycobacterium tuberculosis H37Rv]                                       | 244 | 9  |
| gij2104379  | PROBABLE 50S RIBOSOMAL PROTEIN L17 RPLQ [Mycobacterium tuberculosis H37Rv]                                       | 239 | 8  |
| gij2896735  | PROBABLE FUMARASE FUM (Fumarate hydratase) [Mycobacterium tuberculosis H37Rv]                                    | 238 | 14 |
| gij2695964  | PROBABLE POLYKETIDE BETA-KETOACYL SYNTHASE PKS3 [Mycobacterium tuberculosis H37Rv]                               | 238 | 12 |
| gij2104381  | PROBABLE 30S RIBOSOMAL PROTEIN S4 RPSD [Mycobacterium tuberculosis H37Rv]                                        | 236 | 13 |
| gij1871605  | PROBABLE ACYL-CoA DEHYDROGENASE FADE4 [Mycobacterium tuberculosis H37Rv]                                         | 233 | 11 |
| gij2791584  | PROBABLE 3-ISOPROPYLMALATE DEHYDRATASE (SMALL SUBUNIT) LEUD (ISOPROPYLMALATE ISOMERASE) (ALPHA-IF                | 232 | 7  |
| gij1877329  | PROBABLE ACYL-CoA DEHYDROGENASE FADE25 [Mycobacterium tuberculosis H37Rv]                                        | 230 | 14 |
| gij1877380  | METHOXY MYCOLIC ACID SYNTHASE 4 MMAA4 (METHYL MYCOLIC ACID SYNTHASE 4) (MMA4) (HYDROXY MYCOLIC ACI               | 230 | 13 |
| gij2253068  | Probable oxidoreductase [Mycobacterium tuberculosis H37Rv]                                                       | 230 | 11 |
| gij1806169  | PROBABLE 50S RIBOSOMAL PROTEIN L3 RPLC [Mycobacterium tuberculosis H37Rv]                                        | 228 | 7  |
| gij1524211  | PROBABLE SUCCINYL-CoA SYNTHETASE (BETA CHAIN) SUCC (SCS-BETA) [Mycobacterium tuberculosis H37Rv]                 | 228 | 13 |
| gij1261948  | 3-OXOACYL-[ACYL-CARRIER PROTEIN] SYNTHASE 2 KASB (BETA-KETOACYL-ACP SYNTHASE) (KAS I) [Mycobacterium tut         | 228 | 13 |
| gij2960116  | PROBABLE METHANOL DEHYDROGENASE TRANSCRIPTIONAL REGULATORY PROTEIN MOXR2 [Mycobacterium tuberculo                | 224 | 6  |
| gij1237053  | PROBABLE TRANSMEMBRANE CYTOCHROME C OXIDASE (SUBUNIT II) CTAC [Mycobacterium tuberculosis H37Rv]                 | 222 | 8  |
| gij2916913  | CONSERVED HYPOTHETICAL PROTEIN [Mycobacterium tuberculosis H37Rv]                                                | 222 | 7  |
| gij3261597  | <b>POSSIBLE LIPOPROTEIN LPRA [Mycobacterium tuberculosis H37Rv]</b>                                              | 222 | 6  |
| gij1403448  | CONSERVED HYPOTHETICAL PROTEIN [Mycobacterium tuberculosis H37Rv]                                                | 222 | 12 |
| gij1261924  | PROBABLE GLUTAMINE SYNTHETASE GLNA2 (GLUTAMINE SYNTHASE) (GS-II) [Mycobacterium tuberculosis H37Rv]              | 219 | 13 |
| gij38490238 | PROBABLE ACYL-[ACYL-CARRIER PROTEIN] DESATURASE DESA1 (ACYL-[ACP] DESATURASE) (STEAROYL-ACP DESATL               | 219 | 13 |
| gij1483534  | PROBABLE MALATE SYNTHASE G GLCB [Mycobacterium tuberculosis H37Rv]                                               | 213 | 20 |
| gij2143306  | POSSIBLE RIBONUCLEOTIDE-TRANSPORT ATP-BINDING PROTEIN ABC TRANSPORTER MKL [Mycobacterium tuberculosis            | 209 | 15 |
| gij2117241  | Probable nicotinate-nucleotide pyrophosphatase nadC [Mycobacterium tuberculosis H37Rv]                           | 207 | 3  |

|             |                                                                                                           |     |    |
|-------------|-----------------------------------------------------------------------------------------------------------|-----|----|
| gij1483544  | CONSERVED HYPOTHETICAL PROTEIN CFP17 [Mycobacterium tuberculosis H37Rv]                                   | 205 | 6  |
| gij2911027  | PROBABLE METHYLMALONATE-SEMIALDEHYDE DEHYDROGENASE MMSA (METHYLMALONIC ACID SEMIALDEHYDE DE               | 205 | 12 |
| gij1877379  | PROBABLE 50S RIBOSOMAL PROTEIN L1 RPLA [Mycobacterium tuberculosis H37Rv]                                 | 204 | 15 |
| gij2909544  | PROBABLE 3-HYDROXYBUTYRYL-CoA DEHYDROGENASE FADB2 (BETA-HYDROXYBUTYRYL-CoA DEHYDROGENASE) (B              | 202 | 9  |
| gij38490231 | POSSIBLE ZINC-CONTAINING ALCOHOL DEHYDROGENASE NAD DEPENDENT ADHB [Mycobacterium tuberculosis H37Rv]      | 201 | 7  |
| gij2909479  | PROBABLE CONSERVED TRANSMEMBRANE PROTEIN [Mycobacterium tuberculosis H37Rv]                               | 198 | 10 |
| gij2113992  | CONSERVED HYPOTHETICAL PROTEIN [Mycobacterium tuberculosis H37Rv]                                         | 197 | 15 |
| gij1806172  | PROBABLE 50S ribosomal protein L2 RPLB [Mycobacterium tuberculosis H37Rv]                                 | 196 | 11 |
| gij3242248  | PROBABLE OXIDOREDUCTASE [Mycobacterium tuberculosis H37Rv]                                                | 196 | 14 |
| gij1806170  | PROBABLE 50S RIBOSOMAL PROTEIN L4 RPLD [Mycobacterium tuberculosis H37Rv]                                 | 194 | 8  |
| gij1403498  | Possible ketoacyl reductase [Mycobacterium tuberculosis H37Rv]                                            | 194 | 6  |
| gij2225984  | PROBABLE BACTERIOFERRITIN BFRA [Mycobacterium tuberculosis H37Rv]                                         | 193 | 10 |
| gij2113960  | CONSERVED HYPOTHETICAL ALANINE AND GLYCINE RICH PROTEIN [Mycobacterium tuberculosis H37Rv]                | 189 | 4  |
| gij2661668  | POSSIBLE DEHYDROGENASE [Mycobacterium tuberculosis H37Rv]                                                 | 188 | 11 |
| gij1870013  | PROBABLE 50S RIBOSOMAL PROTEIN L25 RPLY [Mycobacterium tuberculosis H37Rv]                                | 187 | 7  |
| gij2113962  | CONSERVED HYPOTHETICAL PROTEIN [Mycobacterium tuberculosis H37Rv]                                         | 185 | 7  |
| gij2909534  | PROBABLE ALDEHYDE DEHYDROGENASE [Mycobacterium tuberculosis H37Rv]                                        | 184 | 7  |
| gij2808723  | PROBABLE ISOCITRATE DEHYDROGENASE [NADP] ICD2 (OXALOSUCCINATE DECARBOXYLASE) (IDH) (NADP+-SPECIFIC        | 183 | 15 |
| gij3261618  | PROBABLE GLUTAMINE-TRANSPORT TRANSMEMBRANE PROTEIN ABC TRANSPORTER [Mycobacterium tuberculosis H37F       | 182 | 7  |
| gij38490291 | ALANINE AND PROLINE RICH SECRETED PROTEIN APA (FIBRONECTIN ATTACHMENT PROTEIN) (Immunogenic protein MF    | 182 | 5  |
| gij2213511  | MCE-FAMILY PROTEIN MCE1F [Mycobacterium tuberculosis H37Rv]                                               | 181 | 6  |
| gij1877335  | PROBABLE PROPIONYL-CoA CARBOXYLASE BETA CHAIN 5 ACCD5 (PCCASE) (PROPANOYL-COA:CARBON DIOXIDE LIG/         | 180 | 9  |
| gij1781234  | TWO COMPONENT TRANSCRIPTIONAL REGULATORY PROTEIN DEVR (PROBABLY LUXR/UHPA-FAMILY) [Mycobacterium t        | 179 | 13 |
| gij2104363  | PROBABLE 30S RIBOSOMAL PROTEIN S9 RPSI [Mycobacterium tuberculosis H37Rv]                                 | 177 | 5  |
| gij1314045  | POSSIBLE ENOYL-CoA HYDRATASE ECHA6 (ENOYL HYDRASE) (UNSATURATED ACYL-CoA HYDRATASE) (CROTONASE)           | 177 | 8  |
| gij2213507  | MCE-FAMILY PROTEIN MCE1B [Mycobacterium tuberculosis H37Rv]                                               | 176 | 13 |
| gij2791500  | PROBABLE ATP-DEPENDENT CLP PROTEASE PROTEOLYTIC SUBUNIT 2 CLPP2 (ENDOPEPTIDASE CLP 2) [Mycobacterium      | 175 | 8  |
| gij2213524  | PROBABLE O-METHYLTRANSFERASE [Mycobacterium tuberculosis H37Rv]                                           | 174 | 4  |
| gij1806237  | PROBABLE ACYL-CoA LIGASE FADD31 (ACYL-COA SYNTHETASE) (ACYL-CoA SYNTHASE) [Mycobacterium tuberculosis H37 | 173 | 12 |
| gij2911004  | CONSERVED HYPOTHETICAL PROTEIN [Mycobacterium tuberculosis H37Rv]                                         | 173 | 12 |
| gij3242284  | CONSERVED HYPOTHETICAL PROTEIN [Mycobacterium tuberculosis H37Rv]                                         | 172 | 6  |
| gij1806184  | PROBABLE 50S RIBOSOMAL PROTEIN L5 RPLE [Mycobacterium tuberculosis H37Rv]                                 | 169 | 7  |
| gij1666140  | POSSIBLE RIBONUCLEASE E RNE [Mycobacterium tuberculosis H37Rv]                                            | 169 | 13 |
| gij38684052 | POSSIBLE SUCCINATE-SEMIALDEHYDE DEHYDROGENASE [NADP+] DEPENDENT (SSDH) GABD2 [Mycobacterium tubercul      | 167 | 8  |
| gij38490217 | PROBABLE PREPROTEIN TRANSLOCASE SECE1 [Mycobacterium tuberculosis H37Rv]                                  | 167 | 2  |
| gij38490186 | POSSIBLE MYCOLIC ACID SYNTHASE UMAA [Mycobacterium tuberculosis H37Rv]                                    | 165 | 7  |
| gij1403431  | PROBABLE 30S RIBOSOMAL PROTEIN S16 RPSP [Mycobacterium tuberculosis H37Rv]                                | 159 | 10 |
| gij1237072  | PROBABLE CONSERVED TRANSMEMBRANE PROTEIN [Mycobacterium tuberculosis H37Rv]                               | 159 | 6  |
| gij2909625  | CONSERVED HYPOTHETICAL PROTEIN [Mycobacterium tuberculosis H37Rv]                                         | 156 | 5  |
| gij1449322  | CONSERVED HYPOTHETICAL PROTEIN [Mycobacterium tuberculosis H37Rv]                                         | 155 | 7  |
| gij1403475  | IMMUNOGENIC PROTEIN MPT64 (ANTIGEN MPT64/MPB64) [Mycobacterium tuberculosis H37Rv]                        | 153 | 5  |



|              |                                                                                                                             |     |    |
|--------------|-----------------------------------------------------------------------------------------------------------------------------|-----|----|
| gij 2695831  | PROBABLE SHORT-CHAIN TYPE DEHYDROGENASE/REDUCTASE [Mycobacterium tuberculosis H37Rv]                                        | 152 | 6  |
| gij 2225961  | <b>POSSIBLE LIPOPROTEIN LPPD [Mycobacterium tuberculosis H37Rv]</b>                                                         | 151 | 3  |
| gij 2924446  | PROBABLE ACETOHYDROXYACID SYNTHASE ILVX (ACETOLACTATE SYNTHASE) [Mycobacterium tuberculosis H37Rv]                          | 151 | 13 |
| gij 41353449 | PROBABLE SHORT-CHAIN TYPE DEHYDROGENASE/REDUCTASE [Mycobacterium tuberculosis H37Rv]                                        | 150 | 5  |
| gij 1877269  | PROBABLE TRANSCRIPTIONAL REGULATORY PROTEIN (POSSIBLY TETR-FAMILY) [Mycobacterium tuberculosis H37Rv]                       | 150 | 9  |
| gij 2827603  | PROBABLE CONSERVED TRANSMEMBRANE PROTEIN [Mycobacterium tuberculosis H37Rv]                                                 | 149 | 15 |
| gij 41352734 | SECRETED ANTIGEN 85-C FBPC (85C) (ANTIGEN 85 COMPLEX C) (AG58C) (MYCOLYL TRANSFERASE 85C) (FIBRONECTII                      | 149 | 7  |
| gij 1405777  | CONSERVED HYPOTHETICAL PROTEIN [Mycobacterium tuberculosis H37Rv]                                                           | 148 | 11 |
| gij 1841458  | <b>PROBABLE CONSERVED LIPOPROTEIN LPPX [Mycobacterium tuberculosis H37Rv]</b>                                               | 146 | 5  |
| gij 1478225  | PROBABLE PROTEIN-EXPORT MEMBRANE PROTEIN SECD [Mycobacterium tuberculosis H37Rv]                                            | 144 | 13 |
| gij 2909538  | DIHYDROLIPOAMIDE DEHYDROGENASE LPD (LIPOAMIDE REDUCTASE (NADH)) (LIPOYL DEHYDROGENASE) (DIHYDROL                            | 144 | 9  |
| gij 2213509  | MCE-FAMILY PROTEIN MCE1D [Mycobacterium tuberculosis H37Rv]                                                                 | 142 | 18 |
| gij 1817697  | PUTATIVE TUBERCULIN RELATED PEPTIDE [Mycobacterium tuberculosis H37Rv]                                                      | 142 | 3  |
| gij 3261612  | Probable CDP-diacylglycerol pyrophosphatase Cdh (CDP-diacylglycerol diphosphatase) (CDP-diacylglycerol phosphatidylhydrolas | 141 | 9  |
| gij 3261796  | POSSIBLE CONSERVED TRANSMEMBRANE ALANINE AND GLYCINE RICH PROTEIN [Mycobacterium tuberculosis H37Rv]                        | 134 | 7  |
| gij 2193936  | POSSIBLE BETA-1,3-GLUCANASE PRECURSOR [Mycobacterium tuberculosis H37Rv]                                                    | 134 | 6  |
| gij 1877377  | PROBABLE TRANSCRIPTION ANTITERMINATION PROTEIN NUSG [Mycobacterium tuberculosis H37Rv]                                      | 133 | 4  |
| gij 1621250  | <b>PROBABLE CONSERVED LIPOPROTEIN LPRF [Mycobacterium tuberculosis H37Rv]</b>                                               | 133 | 8  |
| gij 2181967  | PROBABLE SERINE PROTEASE PEPA (SERINE PROTEINASE) (MTB32A) [Mycobacterium tuberculosis H37Rv]                               | 131 | 4  |
| gij 1568593  | PROBABLE SINGLE-STRAND BINDING PROTEIN SSB (HELIX-DESTABILIZING PROTEIN) [Mycobacterium tuberculosis H37Rv]                 | 129 | 2  |
| gij 3261523  | POSSIBLE CONSERVED TRANSMEMBRANE TRANSPORT PROTEIN MMPL3 [Mycobacterium tuberculosis H37Rv]                                 | 129 | 9  |
| gij 1370258  | Probable membrane protein [Mycobacterium tuberculosis H37Rv]                                                                | 125 | 3  |
| gij 2791598  | PROBABLE KETOL-ACID REDUCTOISOMERASE ILVC (Acetohydroxy-acid isomeroeductase) (Alpha-keto-beta-hydroxylacil red             | 125 | 9  |
| gij 1877338  | PROBABLE THIOSULFATE SULFURTRANSFERASE SSEA (RHODANESE) (THIOSULFATE CYANIDE TRANSULFURASE) (T                              | 124 | 9  |
| gij 2213510  | <b>POSSIBLE MCE-FAMILY LIPOPROTEIN LPRK (MCE-FAMILY LIPOPROTEIN MCE1E) [Mycobacterium tuberculosis H37Rv]</b>               | 123 | 12 |
| gij 2896707  | PROBABLE ENOYL-CoA HYDRATASE ECHA8 (ENOYL HYDRASE) (UNSATURATED ACYL-CoA HYDRATASE) (CROTONASE                              | 122 | 7  |
| gij 2950423  | SECRETED ANTIGEN 85-A FBPA (MYCOLYL TRANSFERASE 85A) (FIBRONECTIN-BINDING PROTEIN A) (ANTIGEN 85 COM                        | 121 | 6  |
| gij 1781097  | PROBABLE FERREDOXIN-DEPENDENT GLUTAMATE SYNTHASE [NADPH] (LARGE SUBUNIT) GLTB (L-GLUTAMATE SYNTI                            | 121 | 25 |
| gij 2131047  | PROBABLE TRANSKETOLASE TKT (TK) [Mycobacterium tuberculosis H37Rv]                                                          | 120 | 5  |
| gij 1237068  | Probable pyruvate dehydrogenase (E2 component) SucB [Mycobacterium tuberculosis H37Rv]                                      | 120 | 5  |
| gij 2916903  | POSSIBLE NITRATE/NITRITE RESPONSE TRANSCRIPTIONAL REGULATORY PROTEIN NARL [Mycobacterium tuberculosis H                     | 119 | 6  |
| gij 2104317  | CONSERVED HYPOTHETICAL PROTEIN [Mycobacterium tuberculosis H37Rv]                                                           | 117 | 8  |
| gij 2105066  | INORGANIC PYROPHOSPHATASE PPA (PYROPHOSPHATE PHOSPHO-HYDROLASE) (PPASE) (INORGANIC DIPHOSPHAT,                              | 117 | 4  |
| gij 2113910  | Probable two-component system transcriptional regulator [Mycobacterium tuberculosis H37Rv]                                  | 117 | 6  |
| gij 2326746  | Probable catechol-o-methyltransferase [Mycobacterium tuberculosis H37Rv]                                                    | 117 | 7  |
| gij 1237049  | Probable Ubiquinol-cytochrome C reductase QcrB (cytochrome B subunit) [Mycobacterium tuberculosis H37Rv]                    | 116 | 6  |
| gij 1877328  | PROBABLE TRANSMEMBRANE CARBONIC ANHYDRASE (CARBONATE DEHYDRATASE) (CARBONIC DEHYDRATASE) [My                                | 116 | 4  |
| gij 1781220  | PROBABLE NADH DEHYDROGENASE I (CHAIN D) NUOD (NADH-UBIQUINONE OXIDOREDUCTASE CHAIN D) [Mycobacteriu                         | 116 | 4  |
| gij 1870011  | PROBABLE RIBOSE-PHOSPHATE PYROPHOSPHOKINASE PRSA (Phosphoribosyl pyrophosphate synthetase) (PRPP syntheta                   | 115 | 8  |
| gij 2924466  | CONSERVED HYPOTHETICAL PROTEIN [Mycobacterium tuberculosis H37Rv]                                                           | 115 | 13 |
| gij 2113936  | PROBABLE SUCCINYL-COA:3-KETOACID-COENZYME A TRANSFERASE (BETA SUBUNIT) SCOB (3-OXO-ACID:COA TRANS                           | 114 | 9  |

|              |                                                                                                                   |     |    |
|--------------|-------------------------------------------------------------------------------------------------------------------|-----|----|
| gij 2791643  | PROBABLE NADP-DEPENDENT ALCOHOL DEHYDROGENASE ADHC [Mycobacterium tuberculosis H37Rv]                             | 113 | 7  |
| gij 2960112  | CONSERVED HYPOTHETICAL PROTEIN [Mycobacterium tuberculosis H37Rv]                                                 | 113 | 2  |
| gij 1237048  | Probable Rieske iron-sulfur protein QcrA [Mycobacterium tuberculosis H37Rv]                                       | 111 | 12 |
| gij 41353622 | <b>PERIPLASMIC PHOSPHATE-BINDING LIPOPROTEIN PSTS2 (PBP-2) (PSTS2) [Mycobacterium tuberculosis H37Rv]</b>         | 110 | 3  |
| gij 2909480  | PROBABLE MEMBRANE-ANCHORED MYCOSIN MYCP3 (SERINE PROTEASE) (SUBTILISIN-LIKE PROTEASE) (SUBTILASE-I                | 110 | 5  |
| gij 1480321  | HYPOTHETICAL PROTEIN [Mycobacterium tuberculosis H37Rv]                                                           | 108 | 7  |
| gij 2791592  | PROBABLE 3-ISOPROPYLMALATE DEHYDROGENASE LEUB (BETA-IPM DEHYDROGENASE) (IMDH) (3-IPM-DH) [Mycobacte               | 108 | 8  |
| gij 2960129  | CONSERVED HYPOTHETICAL PROTEIN [Mycobacterium tuberculosis H37Rv]                                                 | 107 | 2  |
| gij 2190473  | 29 KDa ANTIGEN CFP29 [Mycobacterium tuberculosis H37Rv]                                                           | 107 | 6  |
| gij 1322431  | PROBABLE ATP SYNTHASE DELTA CHAIN ATPH [Mycobacterium tuberculosis H37Rv]                                         | 105 | 13 |
| gij 1806189  | PROBABLE 30S RIBOSOMAL PROTEIN S5 RPSE [Mycobacterium tuberculosis H37Rv]                                         | 104 | 7  |
| gij 1314023  | POSSIBLE PHOSPHOSERINE AMINOTRANSFERASE SERC (PSAT) [Mycobacterium tuberculosis H37Rv]                            | 104 | 2  |
| gij 2960114  | PROBABLE CONSERVED MEMBRANE PROTEIN [Mycobacterium tuberculosis H37Rv]                                            | 104 | 5  |
| gij 1237047  | Probable Ubiquinol-cytochrome C reductase QcrC(cytochrome C subunit) [Mycobacterium tuberculosis H37Rv]           | 104 | 5  |
| gij 2791388  | PROBABLE QUINONE REDUCTASE QOR (NADPH:quinone reductase) (Zeta-crystallin homolog protein) [Mycobacterium tubercu | 103 | 7  |
| gij 1929075  | PROBABLE TRANSFERASE [Mycobacterium tuberculosis H37Rv]                                                           | 102 | 4  |
| gij 1542918  | AMINOGLYCOSIDES/TETRACYCLINE-TRANSPORT INTEGRAL MEMBRANE PROTEIN [Mycobacterium tuberculosis H37Rv]               | 102 | 1  |
| gij 1806175  | PROBABLE 30S RIBOSOMAL PROTEIN S3 RPSC [Mycobacterium tuberculosis H37Rv]                                         | 102 | 23 |
| gij 1781106  | CONSERVED HYPOTHETICAL PROTEIN [Mycobacterium tuberculosis H37Rv]                                                 | 101 | 2  |
| gij 1552861  | POSSIBLE AMINOTRANSFERASE [Mycobacterium tuberculosis H37Rv]                                                      | 101 | 9  |
| gij 2326726  | Possible long-chain acyl-CoA synthase [Mycobacterium tuberculosis H37Rv]                                          | 100 | 8  |
| gij 1403416  | POSSIBLE MYCOBACTIN UTILIZATION PROTEIN VIUB [Mycobacterium tuberculosis H37Rv]                                   | 98  | 5  |
| gij 1403499  | POSSIBLE FATTY ACYL-CoA REDUCTASE [Mycobacterium tuberculosis H37Rv]                                              | 98  | 9  |
| gij 2131049  | PROBABLE GLUCOSE-6-PHOSPHATE 1-DEHYDROGENASE ZWF2 (G6PD) [Mycobacterium tuberculosis H37Rv]                       | 98  | 6  |
| gij 2105071  | <b>PROBABLE CONSERVED LIPOPROTEIN LPQG [Mycobacterium tuberculosis H37Rv]</b>                                     | 98  | 1  |
| gij 2182002  | IRON-DEPENDENT REPRESSOR AND ACTIVATOR IDER [Mycobacterium tuberculosis H37Rv]                                    | 97  | 5  |
| gij 2909639  | CONSERVED HYPOTHETICAL PROTEIN [Mycobacterium tuberculosis H37Rv]                                                 | 96  | 3  |
| gij 1552575  | CONSERVED HYPOTHETICAL PROTEIN TB39.8 [Mycobacterium tuberculosis H37Rv]                                          | 96  | 10 |
| gij 2909597  | PROBABLE CONSERVED MEMBRANE PROTEIN [Mycobacterium tuberculosis H37Rv]                                            | 95  | 7  |
| gij 1552560  | POSSIBLE CONSERVED MEMBRANE PROTEIN [Mycobacterium tuberculosis H37Rv]                                            | 95  | 6  |
| gij 2117199  | PROBABLE RESPIRATORY NITRATE REDUCTASE (ALPHA CHAIN) NARG [Mycobacterium tuberculosis H37Rv]                      | 94  | 12 |
| gij 2052143  | HYPOTHETICAL PROTEIN [Mycobacterium tuberculosis H37Rv]                                                           | 93  | 4  |
| gij 1552857  | POSSIBLE ENOYL-CoA HYDRATASE ECHA21 (ENOYL HYDRASE) (UNSATURATED ACYL-CoA HYDRATASE) (CROTONASE                   | 92  | 5  |
| gij 2896708  | POSSIBLE ENOYL-CoA HYDRATASE ECHA9 (ENOYL HYDRASE) (UNSATURATED ACYL-CoA HYDRATASE) (CROTONASE)                   | 92  | 3  |
| gij 2909540  | CONSERVED HYPOTHETICAL PROTEIN [Mycobacterium tuberculosis H37Rv]                                                 | 91  | 1  |
| gij 2661671  | CYCLOPROPANE-FATTY-ACYL-PHOSPHOLIPID SYNTHASE 1 CMAA1 (CYCLOPROPANE FATTY ACID SYNTHASE) (CFA S)                  | 91  | 2  |
| gij 2072713  | TWO COMPONENT SENSORY TRANSDUCTION TRANSCRIPTIONAL REGULATORY PROTEIN MTRA [Mycobacterium tubercu                 | 91  | 4  |
| gij 2924462  | CONSERVED HYPOTHETICAL PROTEIN [Mycobacterium tuberculosis H37Rv]                                                 | 90  | 4  |
| gij 1314041  | POSSIBLE CONSERVED EXPORTED OR MEMBRANE PROTEIN [Mycobacterium tuberculosis H37Rv]                                | 90  | 2  |
| gij 41352743 | POSSIBLE LYSOPHOSPHOLIPASE [Mycobacterium tuberculosis H37Rv]                                                     | 88  | 4  |
| gij 1806174  | PROBABLE 50S RIBOSOMAL PROTEIN L22 RPLV [Mycobacterium tuberculosis H37Rv]                                        | 87  | 5  |

|             |                                                                                                         |    |    |
|-------------|---------------------------------------------------------------------------------------------------------|----|----|
| gij2827610  | POSSIBLE TRANSMEMBRANE CATION TRANSPORTER [Mycobacterium tuberculosis H37Rv]                            | 87 | 5  |
| gij2661669  | <b>PROBABLE CONSERVED LIPOPROTEIN LPQD [Mycobacterium tuberculosis H37Rv]</b>                           | 86 | 6  |
| gij41353626 | CONSERVED HYPOTHETICAL PROTEIN [Mycobacterium tuberculosis H37Rv]                                       | 86 | 4  |
| gij1403459  | CONSERVED HYPOTHETICAL PROTEIN [Mycobacterium tuberculosis H37Rv]                                       | 84 | 6  |
| gij2253049  | proteasome (alpha subunit) PrcA [Mycobacterium tuberculosis H37Rv]                                      | 84 | 3  |
| gij1694862  | POSSIBLE CONSERVED MEMBRANE OR SECRETED PROTEIN [Mycobacterium tuberculosis H37Rv]                      | 83 | 5  |
| gij1405964  | PROBABLE THIOESTERASE TESA [Mycobacterium tuberculosis H37Rv]                                           | 83 | 5  |
| gij2104408  | PROBABLE SHORT-CHAIN TYPE DEHYDROGENASE/REDUCTASE [Mycobacterium tuberculosis H37Rv]                    | 82 | 7  |
| gij2276335  | PROBABLE IRON-SULFUR-BINDING REDUCTASE [Mycobacterium tuberculosis H37Rv]                               | 82 | 11 |
| gij2117243  | Probable quinolinate synthetase nadA [Mycobacterium tuberculosis H37Rv]                                 | 82 | 7  |
| gij1871584  | PROBABLE IRON-REGULATED PHOSPHOENOLPYRUVATE CARBOXYKINASE [GTP] PCKA (PHOSPHOENOLPYRUVATE C/            | 82 | 6  |
| gij2076700  | CONSERVED HYPOTHETICAL PROTEIN [Mycobacterium tuberculosis H37Rv]                                       | 82 | 7  |
| gij2181990  | CONSERVED HYPOTHETICAL PROTEIN [Mycobacterium tuberculosis H37Rv]                                       | 82 | 3  |
| gij2911005  | CONSERVED HYPOTHETICAL PROTEIN [Mycobacterium tuberculosis H37Rv]                                       | 82 | 2  |
| gij2909452  | PROBABLE SUCCINATE DEHYDROGENASE [IRON-SULFUR SUBUNIT] (SUCCINIC DEHYDROGENASE) [Mycobacterium tube     | 82 | 9  |
| gij3261657  | PROBABLE GAMMA-GLUTAMYLTRANSFERASE PRECURSOR GGTB (GAMMA-GLUTAMYLTRANSFERASE) (GLUTAMYL                 | 81 | 7  |
| gij1806187  | PROBABLE 50S RIBOSOMAL PROTEIN L6 RPLF [Mycobacterium tuberculosis H37Rv]                               | 81 | 4  |
| gij1261946  | MEROMYCOLATE EXTENSION ACYL CARRIER PROTEIN ACPM [Mycobacterium tuberculosis H37Rv]                     | 81 | 2  |
| gij3261563  | Possible short-chain dehydrogenase EphD [Mycobacterium tuberculosis H37Rv]                              | 80 | 21 |
| gij3261513  | DNA POLYMERASE III (BETA CHAIN) DNAN (DNA NUCLEOTIDYLTRANSFERASE) [Mycobacterium tuberculosis H37Rv]    | 78 | 10 |
| gij2896743  | PROBABLE CHOLESTEROL DEHYDROGENASE [Mycobacterium tuberculosis H37Rv]                                   | 78 | 6  |
| gij2808706  | PROBABLE CONSERVED TRANSMEMBRANE PROTEIN [Mycobacterium tuberculosis H37Rv]                             | 78 | 3  |
| gij1552572  | PROBABLE CELL DIVISION PROTEIN RODA [Mycobacterium tuberculosis H37Rv]                                  | 78 | 1  |
| gij2131058  | PROBABLE TRIOSEPHOSPHATE ISOMERASE TPI (TIM) [Mycobacterium tuberculosis H37Rv]                         | 77 | 9  |
| gij2624287  | PROBABLE ALANINE RICH HYDROLASE [Mycobacterium tuberculosis H37Rv]                                      | 77 | 3  |
| gij1781067  | PROBABLE CYTOPLASMIC PEPTIDASE PEPQ [Mycobacterium tuberculosis H37Rv]                                  | 77 | 11 |
| gij2695961  | PROBABLE FERREDOXIN FDXC [Mycobacterium tuberculosis H37Rv]                                             | 76 | 2  |
| gij1314043  | TWO COMPONENT RESPONSE TRANSCRIPTIONAL REGULATORY PROTEIN PRRA [Mycobacterium tuberculosis H37Rv]       | 76 | 3  |
| gij1449386  | CONSERVED HYPOTHETICAL PROTEIN [Mycobacterium tuberculosis H37Rv]                                       | 75 | 4  |
| gij2078074  | CONSERVED HYPOTHETICAL PROTEIN [Mycobacterium tuberculosis H37Rv]                                       | 74 | 6  |
| gij2909445  | CONSERVED HYPOTHETICAL PROTEIN [Mycobacterium tuberculosis H37Rv]                                       | 74 | 8  |
| gij3261571  | ACETYL/PROPIONYL-CoA CARBOXYLASE (BETA SUBUNIT) ACCD6 [Mycobacterium tuberculosis H37Rv]                | 74 | 7  |
| gij1478226  | PROBABLE PROTEIN-EXPORT MEMBRANE PROTEIN SECF [Mycobacterium tuberculosis H37Rv]                        | 73 | 3  |
| gij1552863  | CONSERVED HYPOTHETICAL PROTEIN [Mycobacterium tuberculosis H37Rv]                                       | 73 | 12 |
| gij2909519  | CONSERVED HYPOTHETICAL PROTEIN [Mycobacterium tuberculosis H37Rv]                                       | 73 | 3  |
| gij38490198 | PROBABLE UROPORPHYRIN-III C-METHYLTRANSFERASE HEMD (UROPORPHYRINOGEN III METHYLASE) (UROGEN III M       | 73 | 4  |
| gij1648881  | PROBABLE TRANSLATION INITIATION FACTOR IF-2 INFB [Mycobacterium tuberculosis H37Rv]                     | 73 | 11 |
| gij1322438  | CONSERVED HYPOTHETICAL PROTEIN [Mycobacterium tuberculosis H37Rv]                                       | 72 | 2  |
| gij2076677  | PUTATIVE CELL DIVISION ATP-BINDING PROTEIN FTSE (SEPTATION COMPONENT-TRANSPORT ATP-BINDING PROTEIN      | 72 | 7  |
| gij1817698  | PROBABLE PERIPLASMIC SUPEROXIDE DISMUTASE [CU-ZN] SODC [Mycobacterium tuberculosis H37Rv]               | 72 | 4  |
| gij1552570  | TRANSMEMBRANE SERINE/THREONINE-PROTEIN KINASE A PKNA (PROTEIN KINASE A) (STPK A) [Mycobacterium tubercu | 72 | 8  |

|             |                                                                                                           |    |    |
|-------------|-----------------------------------------------------------------------------------------------------------|----|----|
| gij1483550  | POSSIBLE PREPROTEIN TRANSLOCASE ATPase SECA2 [Mycobacterium tuberculosis H37Rv]                           | 72 | 10 |
| gij1781172  | FATTY-ACID-CoA LIGASE FADD28 (FATTY-ACID-CoA SYNTHETASE) (FATTY-ACID-CoA SYNTHASE) [Mycobacterium tubercu | 72 | 12 |
| gij2131012  | PROBABLE CONSERVED TRANSMEMBRANE ATP-BINDING PROTEIN ABC TRANSPORTER [Mycobacterium tuberculosis H37      | 71 | 9  |
| gij1478228  | ADENINE PHOSPHORIBOSYLTRANSFERASE APT (APRT) (AMP DIPHOSPHORYLASE) (AMP PYROPHOSPHORYLASE) (TR.           | 71 | 6  |
| gij1877262  | PROBABLE PEPTIDE METHIONINE SULFOXIDE REDUCTASE MSRA (PROTEIN-METHIONINE-S-OXIDE REDUCTASE) (PEP          | 71 | 4  |
| gij2896706  | CONSERVED HYPOTHETICAL PROTEIN [Mycobacterium tuberculosis H37Rv]                                         | 71 | 4  |
| gij2916911  | POSSIBLE FATTY-ACID-CoA LIGASE FADD16 (FATTY-ACID-CoA SYNTHETASE) (FATTY-ACID-CoA SYNTHASE) [Mycobacteri  | 71 | 2  |
| gij1621261  | PROBABLE PYRIMIDINE OPERON REGULATORY PROTEIN PYRR [Mycobacterium tuberculosis H37Rv]                     | 69 | 4  |
| gij2624295  | DIHYDRODIPICOLINATE REDUCTASE DAPB (DHPR) [Mycobacterium tuberculosis H37Rv]                              | 69 | 6  |
| gij3261562  | Probable aminopeptidase PepB [Mycobacterium tuberculosis H37Rv]                                           | 69 | 8  |
| gij1806238  | HYPOTHETICAL PROTEIN [Mycobacterium tuberculosis H37Rv]                                                   | 68 | 1  |
| gij3261627  | CONSERVED HYPOTHETICAL PROTEIN [Mycobacterium tuberculosis H37Rv]                                         | 68 | 4  |
| gij1694883  | POSSIBLE OXIDOREDUCTASE [Mycobacterium tuberculosis H37Rv]                                                | 68 | 5  |
| gij1552591  | CONSERVED HYPOTHETICAL PROTEIN [Mycobacterium tuberculosis H37Rv]                                         | 68 | 6  |
| gij2960132  | ASPARTATE-SEMIALDEHYDE DEHYDROGENASE ASD (ASA DEHYDROGENASE) (ASADH) (ASPARTIC SEMIALDEHYDE DE            | 67 | 5  |
| gij1449282  | PROBABLE SHORT-CHAIN TYPE OXIDOREDUCTASE [Mycobacterium tuberculosis H37Rv]                               | 67 | 3  |
| gij2131030  | HYPOTHETICAL PROTEIN [Mycobacterium tuberculosis H37Rv]                                                   | 67 | 2  |
| gij38490179 | PROBABLE OROTATE PHOSPHORIBOSYLTRANSFERASE PYRE (OPRT) (OPRTASE) [Mycobacterium tuberculosis H37Rv]       | 66 | 2  |
| gij2808729  | PROBABLE GLUTAMINE-TRANSPORT TRANSMEMBRANE PROTEIN ABC TRANSPORTER [Mycobacterium tuberculosis H37F       | 66 | 2  |
| gij41352742 | MCE-FAMILY PROTEIN MCE1A [Mycobacterium tuberculosis H37Rv]                                               | 66 | 6  |
| gij1877381  | METHOXY MYCOLIC ACID SYNTHASE 3 MMAA3 (METHYL MYCOLIC ACID SYNTHASE 3) (MMA3) (HYDROXY MYCOLIC ACI        | 66 | 5  |
| gij1460076  | PROBABLE GLUTAMINE-TRANSPORT ATP-BINDING PROTEIN ABC TRANSPORTER GLNQ [Mycobacterium tuberculosis H37     | 65 | 4  |
| gij2909656  | PROBABLE 30S RIBOSOMAL PROTEIN S7 RPSG [Mycobacterium tuberculosis H37Rv]                                 | 65 | 4  |
| gij2253054  | HYPOTHETICAL PROTEIN [Mycobacterium tuberculosis H37Rv]                                                   | 65 | 5  |
| gij1877280  | PROBABLE NAD(P) TRANSHYDROGENASE (SUBUNIT ALPHA) PNTAA [FIRST PART; CATALYTIC PART] (PYRIDINE NUCLEI      | 65 | 6  |
| gij2225980  | Probable cytochrome p450 140 CYP140 [Mycobacterium tuberculosis H37Rv]                                    | 65 | 3  |
| gij41353649 | Probable Serine hydroxymethyltransferase 1 glyA1 [Mycobacterium tuberculosis H37Rv]                       | 64 | 6  |
| gij2113898  | <b>Possible prolipoprotein diacylglycerol transferases Lgt [Mycobacterium tuberculosis H37Rv]</b>         | 64 | 5  |
| gij1666132  | HYPOTHETICAL PROTEIN [Mycobacterium tuberculosis H37Rv]                                                   | 64 | 5  |
| gij41352792 | PE FAMILY PROTEIN [Mycobacterium tuberculosis H37Rv]                                                      | 64 | 3  |
| gij1838991  | Possible lysyl-tRNA synthetase 2 lysX [Mycobacterium tuberculosis H37Rv]                                  | 62 | 13 |
| gij1781219  | PROBABLE NADH DEHYDROGENASE I (CHAIN E) NUOE (NADH-UBIQUINONE OXIDOREDUCTASE CHAIN E) [Mycobacteriur      | 62 | 1  |
| gij1781178  | Probable reductase [Mycobacterium tuberculosis H37Rv]                                                     | 62 | 3  |
| gij2791502  | PROBABLE TRIGGER FACTOR (TF) PROTEIN TIG [Mycobacterium tuberculosis H37Rv]                               | 62 | 4  |
| gij41353632 | PROBABLE MOLYBDOPTERIN BIOSYNTHESIS PROTEIN MOEA1 [Mycobacterium tuberculosis H37Rv]                      | 61 | 7  |
| gij2113895  | Probable indole-3-glycerol phosphate synthase trpC [Mycobacterium tuberculosis H37Rv]                     | 61 | 5  |
| gij2791513  | POSSIBLE ALANINE AND PROLINE RICH MEMBRANE PROTEIN [Mycobacterium tuberculosis H37Rv]                     | 61 | 3  |
| gij2052127  | PROBABLE UTP--GLUCOSE-1-PHOSPHATE URIDYLYLTRANSFERASE GALU (UDP-GLUCOSE PYROPHOSPHORYLASE) (U             | 61 | 6  |
| gij3261542  | Probable polyketide synthase pks5 [Mycobacterium tuberculosis H37Rv]                                      | 61 | 21 |
| gij1781066  | PROBABLE CONSERVED TRANSMEMBRANE PROTEIN [Mycobacterium tuberculosis H37Rv]                               | 60 | 5  |
| gij1483541  | CONSERVED HYPOTHETICAL PROTEIN [Mycobacterium tuberculosis H37Rv]                                         | 60 | 4  |

|              |                                                                                                                               |    |    |
|--------------|-------------------------------------------------------------------------------------------------------------------------------|----|----|
| gij 2791517  | PROBABLE MACROLIDE-TRANSPORT ATP-BINDING PROTEIN ABC TRANSPORTER [Mycobacterium tuberculosis H37Rv]                           | 60 | 11 |
| gij 2791397  | PROBABLE CONSERVED ATP-BINDING PROTEIN ABC TRANSPORTER [Mycobacterium tuberculosis H37Rv]                                     | 59 | 4  |
| gij 1552593  | CONSERVED HYPOTHETICAL PROTEIN [Mycobacterium tuberculosis H37Rv]                                                             | 59 | 6  |
| gij 2224829  | POSSIBLE ACYLTRANSFERASE [Mycobacterium tuberculosis H37Rv]                                                                   | 58 | 7  |
| gij 2624275  | PROBABLE DIHYDRODIPICOLINATE SYNTHASE DAPA (DHDPS) (DIHYDRODIPICOLINATE SYNTHETASE) [Mycobacterium tuberculosis H37Rv]        | 58 | 3  |
| gij 38490187 | MYCOLIC ACID SYNTHASE PCAA (CYCLOPROPANE SYNTHASE) [Mycobacterium tuberculosis H37Rv]                                         | 58 | 6  |
| gij 2911105  | CONSERVED HYPOTHETICAL PROTEIN TB16.3 [Mycobacterium tuberculosis H37Rv]                                                      | 58 | 3  |
| gij 1694881  | CONSERVED HYPOTHETICAL PROTEIN [Mycobacterium tuberculosis H37Rv]                                                             | 57 | 4  |
| gij 1524229  | 3-OXOACYL-[ACYL-CARRIER PROTEIN] REDUCTASE FABG1 (3-KETOACYL-ACYL CARRIER PROTEIN REDUCTASE) (MYCO)                           | 57 | 2  |
| gij 2791493  | PROBABLE MOLYBDOPTERIN-GUANINE DINUCLEOTIDE BIOSYNTHESIS PROTEIN A MOBA [Mycobacterium tuberculosis H37Rv]                    | 56 | 5  |
| gij 2827579  | CONSERVED HYPOTHETICAL PROTEIN [Mycobacterium tuberculosis H37Rv]                                                             | 56 | 5  |
| gij 1524193  | PROBABLE METAL CATION TRANSPORTER P-TYPE ATPASE CTPV [Mycobacterium tuberculosis H37Rv]                                       | 56 | 5  |
| gij 1552877  | INTEGRAL MEMBRANE INDOLYLACETYLINOSITOL ARABINOSYLTRANSFERASE EMBA (ARABINOSYLINDOLYLACETYLINOSITOL)                          | 56 | 11 |
| gij 1781192  | POSSIBLE OXIDOREDUCTASE [Mycobacterium tuberculosis H37Rv]                                                                    | 55 | 5  |
| gij 2896709  | PROBABLE CONSERVED TRANSMEMBRANE PROTEIN [Mycobacterium tuberculosis H37Rv]                                                   | 55 | 3  |
| gij 38490339 | POSSIBLE PHOSPHOGLYCERATE MUTASE GPM2 (PHOSPHOGLYCEROMUTASE) (PGAM) (BPG-DEPENDENT PGAM) [Mycobacterium tuberculosis H37Rv]   | 55 | 1  |
| gij 2104307  | Possible pyridoxine biosynthesis protein [Mycobacterium tuberculosis H37Rv]                                                   | 55 | 5  |
| gij 1877282  | PROBABLE NAD(P) TRANSHYDROGENASE (SUBUNIT BETA) PNTB [INTEGRAL MEMBRANE PROTEIN] (PYRIDINE NUCLEOTIDE)                        | 55 | 5  |
| gij 1781138  | CONSERVED HYPOTHETICAL PROTEIN [Mycobacterium tuberculosis H37Rv]                                                             | 54 | 1  |
| gij 3261509  | RIBONUCLEOSIDE-DIPHOSPHATE REDUCTASE (ALPHA CHAIN) NRDE (RIBONUCLEOTIDE REDUCTASE SMALL SUBUNIT)                              | 54 | 8  |
| gij 2072680  | CONSERVED HYPOTHETICAL PROTEIN [Mycobacterium tuberculosis H37Rv]                                                             | 53 | 3  |
| gij 2104300  | CONSERVED HYPOTHETICAL PROTEIN [Mycobacterium tuberculosis H37Rv]                                                             | 53 | 6  |
| gij 2131038  | CONSERVED HYPOTHETICAL PROTEIN [Mycobacterium tuberculosis H37Rv]                                                             | 53 | 3  |
| gij 2924476  | CONSERVED HYPOTHETICAL MEMBRANE PROTEIN [Mycobacterium tuberculosis H37Rv]                                                    | 53 | 2  |
| gij 2253050  | proteasome (beta subunit) PrcB [Mycobacterium tuberculosis H37Rv]                                                             | 52 | 5  |
| gij 2076667  | PROBABLE CONSERVED INTEGRAL MEMBRANE PROTEIN [Mycobacterium tuberculosis H37Rv]                                               | 52 | 6  |
| gij 2909514  | PROBABLE DEHYDROGENASE/REDUCTASE [Mycobacterium tuberculosis H37Rv]                                                           | 51 | 2  |
| gij 2911012  | CONSERVED HYPOTHETICAL PROTEIN [Mycobacterium tuberculosis H37Rv]                                                             | 50 | 3  |
| gij 1449321  | PROBABLE CHAPERONE PROTEIN HTPG (HEAT SHOCK PROTEIN) (HSP90 FAMILY PROTEIN) (HIGH TEMPERATURE PROTEIN)                        | 50 | 11 |
| gij 2916974  | HYPOTHETICAL PROTEIN [Mycobacterium tuberculosis H37Rv]                                                                       | 50 | 4  |
| gij 1781230  | PROBABLE MONOPHOSPHATASE [Mycobacterium tuberculosis H37Rv]                                                                   | 50 | 4  |
| gij 2113999  | PROBABLE INTEGRAL MEMBRANE PROTEIN [Mycobacterium tuberculosis H37Rv]                                                         | 50 | 6  |
| gij 38490190 | PROBABLE PHOSPHOGLYCERATE MUTASE 1 GPM1 (PHOSPHOGLYCEROMUTASE) (PGAM) (BPG-DEPENDENT PGAM) [Mycobacterium tuberculosis H37Rv] | 50 | 7  |
| gij 2909542  | CONSERVED HYPOTHETICAL PROTEIN [Mycobacterium tuberculosis H37Rv]                                                             | 50 | 4  |
| gij 1552876  | INTEGRAL MEMBRANE INDOLYLACETYLINOSITOL ARABINOSYLTRANSFERASE EMBC (ARABINOSYLINDOLYLACETYLINOSITOL)                          | 49 | 21 |
| gij 2896693  | CONSERVED HYPOTHETICAL PROTEIN [Mycobacterium tuberculosis H37Rv]                                                             | 49 | 2  |
| gij 2909520  | PROBABLE ALTERNATIVE RNA POLYMERASE SIGMA FACTOR SIGK [Mycobacterium tuberculosis H37Rv]                                      | 49 | 2  |
| gij 2896785  | Probable polyketide synthase pks12 [Mycobacterium tuberculosis H37Rv]                                                         | 49 | 18 |
| gij 38490219 | PROBABLE ENOYL-CoA HYDRATASE ECHA5 (ENOYL HYDRASE) (UNSATURATED ACYL-CoA HYDRATASE) (CROTONASE)                               | 48 | 14 |
| gij 38490345 | PROBABLE PREPROTEIN TRANSLOCASE SECA1 1 SUBUNIT [Mycobacterium tuberculosis H37Rv]                                            | 48 | 6  |
| gij 1449377  | PROBABLE INOSINE-5--MONOPHOSPHATE DEHYDROGENASE GUAB3 (IMP DEHYDROGENASE) (INOSINIC ACID DEHYDROGENASE)                       | 47 | 5  |

|             |                                                                                                                      |    |    |
|-------------|----------------------------------------------------------------------------------------------------------------------|----|----|
| gij1781222  | PROBABLE NADH DEHYDROGENASE I (CHAIN B) NUOB (NADH-UBIQUINONE OXIDOREDUCTASE CHAIN B) [Mycobacteriur                 | 47 | 5  |
| gij2104364  | PROBABLE 50S RIBOSOMAL PROTEIN L13 RPLM [Mycobacterium tuberculosis H37Rv]                                           | 47 | 3  |
| gij2117218  | PROBABLE EPOXIDE HYDROLASE EPHC (EPOXIDE HYDRATASE) [Mycobacterium tuberculosis H37Rv]                               | 47 | 3  |
| gij2916883  | CONSERVED HYPOTHETICAL PROTEIN [Mycobacterium tuberculosis H37Rv]                                                    | 47 | 6  |
| gij2661634  | PROBABLE BIFUNCTIONAL PROTEIN FOLD: METHYLENETETRAHYDROFOLATE DEHYDROGENASE + METHENYL TETRAH                        | 46 | 12 |
| gij2916879  | PROBABLE PHOSPHATE-TRANSPORT SYSTEM TRANSCRIPTIONAL REGULATORY PROTEIN PHOY2 [Mycobacterium tuber                    | 46 | 1  |
| gij2193929  | PROBABLE CONSERVED INTEGRAL MEMBRANE PROTEIN [Mycobacterium tuberculosis H37Rv]                                      | 46 | 4  |
| gij2909463  | CONSERVED HYPOTHETICAL PROTEIN [Mycobacterium tuberculosis H37Rv]                                                    | 45 | 1  |
| gij2661647  | POSSIBLE OXIDOREDUCTASE [Mycobacterium tuberculosis H37Rv]                                                           | 45 | 6  |
| gij2052133  | HYPOTHETICAL PROTEIN [Mycobacterium tuberculosis H37Rv]                                                              | 45 | 1  |
| gij2924456  | HYPOTHETICAL PROTEIN [Mycobacterium tuberculosis H37Rv]                                                              | 45 | 6  |
| gij2612804  | POSSIBLE AMIDOTRANSFERASE [Mycobacterium tuberculosis H37Rv]                                                         | 45 | 2  |
| gij2181958  | PROBABLE PHOSPHATE-TRANSPORT SYSTEM TRANSCRIPTIONAL REGULATORY PROTEIN PHOU HOMOLOG 1 PHOY1                          | 45 | 9  |
| gij1877373  | CONSERVED HYPOTHETICAL PROTEIN [Mycobacterium tuberculosis H37Rv]                                                    | 45 | 2  |
| gij2104320  | Probable UDP-N-acetylmuramoylalanyl-D-glutamate-2,6-diaminopimelate e ligase MurE [Mycobacterium tuberculosis H37Rv] | 45 | 10 |
| gij1850117  | HYPOTHETICAL PROTEIN [Mycobacterium tuberculosis H37Rv]                                                              | 45 | 7  |
| gij2909470  | CONSERVED HYPOTHETICAL PROTEIN [Mycobacterium tuberculosis H37Rv]                                                    | 44 | 3  |
| gij3261719  | PROBABLE INITIATION FACTOR IF-3 INFC [Mycobacterium tuberculosis H37Rv]                                              | 44 | 4  |
| gij2950448  | CONSERVED HYPOTHETICAL PROTEIN [Mycobacterium tuberculosis H37Rv]                                                    | 44 | 4  |
| gij1237055  | Probable carbohydrate kinase CbhK [Mycobacterium tuberculosis H37Rv]                                                 | 44 | 6  |
| gij1550635  | POSSIBLE TWO COMPONENT SYSTEM RESPONSE TRANSCRIPTIONAL POSITIVE REGULATOR PHOP [Mycobacterium tub-                   | 44 | 4  |
| gij1340098  | PROBABLE TRANSCRIPTIONAL REGULATORY PROTEIN [Mycobacterium tuberculosis H37Rv]                                       | 43 | 6  |
| gij1781253  | PUTATIVE ESAT-6 LIKE PROTEIN ESXO (ESAT-6 LIKE PROTEIN 6) [Mycobacterium tuberculosis H37Rv]                         | 43 | 1  |
| gij1261945  | MALONYL CoA-ACYL CARRIER PROTEIN TRANSACYLASE FABD (Malonyl CoA:AcpM acyltransferase) (MCT) [Mycobacterium           | 43 | 4  |
| gij2224821  | PROBABLE CONSERVED POLYKETIDE SYNTHASE ASSOCIATED PROTEIN PAPA1 [Mycobacterium tuberculosis H37Rv]                   | 43 | 7  |
| gij2131059  | PROBABLE PHOSPHOGLYCERATE KINASE PGK [Mycobacterium tuberculosis H37Rv]                                              | 43 | 3  |
| gij2896723  | SHORT (C15) CHAIN Z-ISOPRENYL DIPHOSPHATE SYNTHASE (Z-FPP SYNTHASE) (Z-FARNESYL DIPHOSPHATE SYNTHA                   | 42 | 2  |
| gij2791590  | POSSIBLE 2-HYDROXYHEPTA-2,4-DIENE-1,7-DIOATE ISOMERASE (HHDD ISOMERASE) [Mycobacterium tuberculosis H37Rv]           | 42 | 1  |
| gij41353675 | PROBABLE CUTINASE CUT2 [Mycobacterium tuberculosis H37Rv]                                                            | 42 | 1  |
| gij2894220  | CONSERVED HYPOTHETICAL PROTEIN [Mycobacterium tuberculosis H37Rv]                                                    | 42 | 5  |
| gij1478222  | PROBABLE FATTY-ACID-CoA LIGASE FADD9 (FATTY-ACID-CoA SYNTHETASE) (FATTY-ACID-CoA SYNTHASE) [Mycobacter               | 42 | 8  |
| gij1781156  | PROBABLE SHORT CHAIN ALCOHOL DEHYDROGENASE/REDUCTASE [Mycobacterium tuberculosis H37Rv]                              | 42 | 6  |
| gij2960233  | CONSERVED HYPOTHETICAL ALANINE AND GLYCINE RICH PROTEIN [Mycobacterium tuberculosis H37Rv]                           | 42 | 4  |
| gij2225986  | HYPOTHETICAL PROTEIN [Mycobacterium tuberculosis H37Rv]                                                              | 41 | 2  |
| gij1403411  | PROBABLE 30S RIBOSOMAL PROTEIN S2 RPSB [Mycobacterium tuberculosis H37Rv]                                            | 41 | 13 |
| gij1449376  | PROBABLE INOSINE-5--MONOPHOSPHATE DEHYDROGENASE GUAB2 (IMP DEHYDROGENASE) (INOSINIC ACID DEHYDI                      | 41 | 6  |
| gij2916912  | PROBABLE PYRUVATE OR INDOLE-3-PYRUVATE DECARBOXYLASE PDC [Mycobacterium tuberculosis H37Rv]                          | 41 | 3  |
| gij2113916  | HYPOTHETICAL PROTEIN [Mycobacterium tuberculosis H37Rv]                                                              | 41 | 2  |
| gij2117182  | PROBABLE SHORT-CHAIN TYPE DEHYDROGENASE/REDUCTASE [Mycobacterium tuberculosis H37Rv]                                 | 41 | 4  |
| gij3261674  | PROBABLE POLYPHOSPHATE KINASE PPK (POLYPHOSPHORIC ACID KINASE) (ATP-POLYPHOSPHATE PHOSPHOTRANS                       | 41 | 8  |
| gij2909600  | PROBABLE CONSERVED TRANSMEMBRANE TRANSPORT PROTEIN MMPL11 [Mycobacterium tuberculosis H37Rv]                         | 41 | 7  |

|             |                                                                                                                                                                                       |    |    |
|-------------|---------------------------------------------------------------------------------------------------------------------------------------------------------------------------------------|----|----|
| gij2896737  | CONSERVED HYPOTHETICAL PROTEIN [Mycobacterium tuberculosis H37Rv]                                                                                                                     | 40 | 1  |
| gij1850116  | PROBABLE ACYL-CoA DEHYDROGENASE FADE6 [Mycobacterium tuberculosis H37Rv]                                                                                                              | 40 | 8  |
| gij2213526  | PROBABLE DIHYDROXY-ACID DEHYDRATASE ILVD (DAD) [Mycobacterium tuberculosis H37Rv]                                                                                                     | 40 | 6  |
| gij1524255  | Probable membrane protein [Mycobacterium tuberculosis H37Rv]                                                                                                                          | 39 | 4  |
| gij2072704  | CONSERVED HYPOTHETICAL PROTEIN [Mycobacterium tuberculosis H37Rv]                                                                                                                     | 39 | 3  |
| gij2911092  | CONSERVED HYPOTHETICAL PROTEIN [Mycobacterium tuberculosis H37Rv]                                                                                                                     | 39 | 4  |
| gij1550658  | PHOSPHORIBOSYLAMINOIMIDAZOLE-SUCCINOCARBOXAMIDE SYNTHASE PURC (SAICAR SYNTHETASE) [Mycobacterium tuberculosis H37Rv]                                                                  | 39 | 5  |
| gij41352745 | SMALL SECRETED PROTEIN [Mycobacterium tuberculosis H37Rv]                                                                                                                             | 38 | 1  |
| gij1524258  | GDP-D-mannose dehydratase gmdA (GDP-mannose 4,6 dehydratase) (GMD) [Mycobacterium tuberculosis H37Rv]                                                                                 | 38 | 3  |
| gij1877350  | PROBABLE TRANSCRIPTIONAL REGULATORY PROTEIN (PROBABLY TETR-FAMILY) [Mycobacterium tuberculosis H37Rv]                                                                                 | 38 | 3  |
| gij1666158  | PROBABLE GAMMA-GLUTAMYL PHOSPHATE REDUCTASE PROA (GPR) (GLUTAMATE-5-SEMIALDEHYDE DEHYDRATASE) [Mycobacterium tuberculosis H37Rv]                                                      | 38 | 6  |
| gij1781257  | PROBABLE MEMBRANE-ASSOCIATED PHOSPHOLIPASE C 2 PLCB [Mycobacterium tuberculosis H37Rv]                                                                                                | 38 | 2  |
| gij2114023  | POSSIBLE OXIDOREDUCTASE [Mycobacterium tuberculosis H37Rv]                                                                                                                            | 38 | 7  |
| gij1261932  | CONSERVED HYPOTHETICAL PROTEIN [Mycobacterium tuberculosis H37Rv]                                                                                                                     | 38 | 4  |
| gij1781233  | CONSERVED HYPOTHETICAL PROTEIN [Mycobacterium tuberculosis H37Rv]                                                                                                                     | 37 | 2  |
| gij2960156  | CONSERVED HYPOTHETICAL PROTEIN [Mycobacterium tuberculosis H37Rv]                                                                                                                     | 37 | 2  |
| gij3261677  | CONSERVED HYPOTHETICAL PROTEIN [Mycobacterium tuberculosis H37Rv]                                                                                                                     | 37 | 2  |
| gij2104338  | CONSERVED HYPOTHETICAL PROTEIN TB18.6 [Mycobacterium tuberculosis H37Rv]                                                                                                              | 37 | 1  |
| gij2909642  | <b>PROBABLE CONSERVED LIPOPROTEIN LPQN [Mycobacterium tuberculosis H37Rv]</b>                                                                                                         | 36 | 1  |
| gij1781137  | CONSERVED HYPOTHETICAL PROTEIN [Mycobacterium tuberculosis H37Rv]                                                                                                                     | 36 | 7  |
| gij2916954  | CONSERVED HYPOTHETICAL PROTEIN [Mycobacterium tuberculosis H37Rv]                                                                                                                     | 36 | 4  |
| gij2695824  | PROBABLE SUGAR-TRANSPORT ATP-BINDING PROTEIN ABC TRANSPORTER SUGC [Mycobacterium tuberculosis H37Rv]                                                                                  | 36 | 4  |
| gij2114010  | PROBABLE NAPHTHOATE SYNTHASE MENB (DIHYDROXYNAPHTHOIC ACID SYNTHETASE) (DHNA SYNTHETASE) [Mycobacterium tuberculosis H37Rv]                                                           | 36 | 3  |
| gij1806181  | PROBABLE CONSERVED TRANSMEMBRANE PROTEIN [Mycobacterium tuberculosis H37Rv]                                                                                                           | 36 | 2  |
| gij1322430  | PROBABLE ATP SYNTHASE B CHAIN ATPF [Mycobacterium tuberculosis H37Rv]                                                                                                                 | 36 | 3  |
| gij2960158  | CONSERVED HYPOTHETICAL PROTEIN [Mycobacterium tuberculosis H37Rv]                                                                                                                     | 35 | 10 |
| gij2253053  | Probable integral membrane protein [Mycobacterium tuberculosis H37Rv]                                                                                                                 | 35 | 2  |
| gij2896738  | CONSERVED MEMBRANE PROTEIN [Mycobacterium tuberculosis H37Rv]                                                                                                                         | 35 | 2  |
| gij2791641  | PROBABLE CYTOCHROME C OXIDASE POLYPEPTIDE I CTAD (CYTOCHROME AA3 SUBUNIT 1) [Mycobacterium tuberculosis H37Rv]                                                                        | 35 | 2  |
| gij3261795  | PROBABLE CONSERVED INTEGRAL MEMBRANE ALANINE AND VALINE AND LEUCINE RICH PROTEIN [Mycobacterium tuberculosis H37Rv]                                                                   | 35 | 11 |
| gij38490371 | CONSERVED HYPOTHETICAL PROTEIN [Mycobacterium tuberculosis H37Rv]                                                                                                                     | 34 | 5  |
| gij2909451  | PROBABLE SUCCINATE DEHYDROGENASE [IRON-SULFUR SUBUNIT] (SUCCINIC DEHYDROGENASE) [Mycobacterium tuberculosis H37Rv]                                                                    | 34 | 5  |
| gij1781236  | CONSERVED HYPOTHETICAL PROTEIN [Mycobacterium tuberculosis H37Rv]                                                                                                                     | 34 | 6  |
| gij1568585  | MYO-INOSITOL-1-PHOSPHATE SYNTHASE INO1 (Inositol 1-phosphate synthetase) (D-glucose 6-phosphate cycloaldolase) (Glucose 6-phosphate cycloaldolase) [Mycobacterium tuberculosis H37Rv] | 34 | 5  |
| gij1929068  | CONSERVED HYPOTHETICAL PROTEIN [Mycobacterium tuberculosis H37Rv]                                                                                                                     | 34 | 3  |
| gij2213500  | CONSERVED HYPOTHETICAL PROTEIN [Mycobacterium tuberculosis H37Rv]                                                                                                                     | 33 | 4  |
| gij2909627  | POSSIBLE CYTOCHROME P450 135B1 CYP135B1 [Mycobacterium tuberculosis H37Rv]                                                                                                            | 33 | 11 |
| gij2960093  | PROBABLE CONSERVED TRANSMEMBRANE PROTEIN [Mycobacterium tuberculosis H37Rv]                                                                                                           | 33 | 6  |
| gij2916871  | CONSERVED HYPOTHETICAL PROTEIN [Mycobacterium tuberculosis H37Rv]                                                                                                                     | 33 | 4  |
| gij2916867  | PROBABLE PHOSPHORIBOSYLFORMYLGLYCINAMIDINE CYCLO-LIGASE PURM (AIRS) (PHOSPHORIBOSYL-AMINOIMIDAZOLE CARBOXAMIDE SYNTHETASE) [Mycobacterium tuberculosis H37Rv]                         | 32 | 1  |
| gij3261779  | PROBABLE DIHYDROLIPOAMIDE S-ACETYLTRANSFERASE E2 COMPONENT PDHC (LIPOATE ACETYLTRANSFERASE) (TIPOATE ACETYLTRANSFERASE) [Mycobacterium tuberculosis H37Rv]                            | 32 | 5  |

|             |                                                                                                                        |    |    |
|-------------|------------------------------------------------------------------------------------------------------------------------|----|----|
| gij2960095  | POSSIBLE MEMBRANE-ASSOCIATED SERINE PROTEASE [Mycobacterium tuberculosis H37Rv]                                        | 32 | 2  |
| gij2916869  | CONSERVED HYPOTHETICAL PROTEIN [Mycobacterium tuberculosis H37Rv]                                                      | 32 | 3  |
| gij1524254  | CONSERVED HYPOTHETICAL PROTEIN [Mycobacterium tuberculosis H37Rv]                                                      | 31 | 1  |
| gij1871596  | PROBABLE ALDEHYDE DEHYDROGENASE [Mycobacterium tuberculosis H37Rv]                                                     | 31 | 5  |
| gij2213513  | PROBABLE CONSERVED MCE ASSOCIATED TRANSMEMBRANE PROTEIN [Mycobacterium tuberculosis H37Rv]                             | 31 | 5  |
| gij2791514  | CONSERVED HYPOTHETICAL PROTEIN [Mycobacterium tuberculosis H37Rv]                                                      | 31 | 2  |
| gij2078021  | LYSINE-N-OXYGENASE MBTG (L-LYSINE 6-MONOOXYGENASE) (LYSINE N6-HYDROXYLASE) [Mycobacterium tuberculosis H37Rv]          | 31 | 4  |
| gij2117226  | CONSERVED MEMBRANE PROTEIN [Mycobacterium tuberculosis H37Rv]                                                          | 31 | 5  |
| gij2113901  | Probable pyruvate kinase pykA [Mycobacterium tuberculosis H37Rv]                                                       | 30 | 7  |
| gij41353684 | HYPOTHETICAL PROTEIN [Mycobacterium tuberculosis H37Rv]                                                                | 30 | 4  |
| gij2105048  | DNA TOPOISOMERASE I TOPA (OMEGA-PROTEIN) (RELAXING ENZYME) (UNTWISTING ENZYME) (SWIVELASE) (TYPE I D                   | 30 | 10 |
| gij2960220  | CONSERVED HYPOTHETICAL PROTEIN [Mycobacterium tuberculosis H37Rv]                                                      | 30 | 5  |
| gij1542920  | PROBABLE RIBOFLAVIN SYNTHASE ALPHA CHAIN RIBC (RIBE) [Mycobacterium tuberculosis H37Rv]                                | 30 | 6  |
| gij1478230  | PROBABLE PEPTIDYL-PROLYL CIS-TRANS ISOMERASE B PPIB (CYCLOPHILIN) (PPIASE) (ROTAMASE) (PEPTIDYLPROLY                   | 30 | 3  |
| gij2113913  | PROBABLE DNA POLYMERASE I POLA [Mycobacterium tuberculosis H37Rv]                                                      | 30 | 12 |
| gij2213515  | PROBABLE CONSERVED MCE ASSOCIATED MEMBRANE PROTEIN [Mycobacterium tuberculosis H37Rv]                                  | 30 | 3  |
| gij1781221  | PROBABLE NADH DEHYDROGENASE I (CHAIN C) NUOC (NADH-UBIQUINONE OXIDOREDUCTASE CHAIN C) [Mycobacteriu                    | 30 | 3  |
| gij1261930  | CONSERVED HYPOTHETICAL PROTEIN [Mycobacterium tuberculosis H37Rv]                                                      | 30 | 8  |
| gij2924455  | PROBABLE CYTOCHROME P450 MONOOXYGENASE 142 CYP142 [Mycobacterium tuberculosis H37Rv]                                   | 30 | 4  |
| gij1781115  | PROBABLE GLYCEROPHOSPHORYL DIESTER PHOSPHODIESTERASE GLPQ1 (GLYCEROPHOSPHODIESTER PHOSPHOI                             | 30 | 5  |
| gij1370234  | CLASS A BETA-LACTAMASE BLAC [Mycobacterium tuberculosis H37Rv]                                                         | 29 | 7  |
| gij3261780  | OLIGORIBONUCLEASE ORN [Mycobacterium tuberculosis H37Rv]                                                               | 29 | 2  |
| gij2193940  | PROBABLE PYRROLIDONE-CARBOXYLATE PEPTIDASE PCP (5-OXOPROLYL-PEPTIDASE) (PYROGLUTAMYL-PEPTIDASE                         | 29 | 3  |
| gij1542917  | PROBABLE BIFUNCTIONAL riboflavin biosynthesis protein RIBG : Diaminohydroxyphosphoribosylaminopyrimidine deaminase (Ri | 29 | 7  |
| gij1524222  | POSSIBLE OXIDOREDUCTASE [Mycobacterium tuberculosis H37Rv]                                                             | 29 | 2  |
| gij1449298  | PROBABLE PYRROLINE-5-CARBOXYLATE REDUCTASE PROC (P5CR) (P5C REDUCTASE) [Mycobacterium tuberculosis H37Rv]              | 28 | 3  |
| gij3242256  | CONSERVED HYPOTHETICAL PROTEIN [Mycobacterium tuberculosis H37Rv]                                                      | 28 | 7  |
| gij1817673  | PROBABLE F420-DEPENDENT GLUCOSE-6-PHOSPHATE DEHYDROGENASE FGD1 [Mycobacterium tuberculosis H37Rv]                      | 28 | 4  |
| gij2695823  | PROBABLE SUGAR-TRANSPORT INTEGRAL MEMBRANE PROTEIN ABC TRANSPORTER SUGB [Mycobacterium tuberculosis                    | 28 | 2  |
| gij2193935  | POSSIBLE CONSERVED MEMBRANE PROTEIN [Mycobacterium tuberculosis H37Rv]                                                 | 28 | 2  |
| gij2266715  | PROBABLE DELTA-AMINOLEVULINIC ACID DEHYDRATASE HEMB (PORPHOBILINOGEN SYNTHASE) (ALAD) (ALADH) [Myc                     | 28 | 4  |
| gij2182004  | PROBABLE SOLUBLE PYRIDINE NUCLEOTIDE TRANSHYDROGENASE STHA (STH) (NAD(P)(+) TRANSHYDROGENASE [B-                       | 28 | 4  |
| gij41353429 | POSSIBLE HALOALKANE DEHALOGENASE DHAA (1-CHLOROHEXANE HALIDOHYDROLASE) [Mycobacterium tuberculosis H                   | 28 | 2  |
| gij1314028  | PROBABLE CITRATE SYNTHASE II CITA [Mycobacterium tuberculosis H37Rv]                                                   | 28 | 3  |
| gij2224831  | POSSIBLE ACYLTRANSFERASE [Mycobacterium tuberculosis H37Rv]                                                            | 27 | 5  |
| gij41352773 | PROBABLE ACETOLACTATE SYNTHASE (LARGE SUBUNIT) ILVB1 (ACETOHYDROXY-ACID SYNTHASE) [Mycobacterium tub                   | 27 | 2  |
| gij2924494  | CONSERVED HYPOTHETICAL PROTEIN [Mycobacterium tuberculosis H37Rv]                                                      | 27 | 5  |
| gij2896764  | Probable histidine kinase response regulator [Mycobacterium tuberculosis H37Rv]                                        | 27 | 7  |
| gij1817674  | PROBABLE PHOSPHATE ACETYLTRANSFERASE PTA (PHOSPHOTRANSACETYLASE) [Mycobacterium tuberculosis H37Rv]                    | 27 | 2  |
| gij1817689  | PROBABLE THIAMINE BIOSYNTHESIS PROTEIN THIC [Mycobacterium tuberculosis H37Rv]                                         | 27 | 3  |
| gij1781145  | PROBABLE PHOSPHOGLUCOMUTASE PGMA (GLUCOSE PHOSPHOMUTASE) (PGM) [Mycobacterium tuberculosis H37Rv]                      | 27 | 1  |



|             |                                                                                                        |    |   |
|-------------|--------------------------------------------------------------------------------------------------------|----|---|
| gij1550666  | PROBABLE PHOSPHORIBOSYLFORMYLGLYCINAMIDINE SYNTHASE I PURG (FGAM SYNTHASE I) [Mycobacterium tubercul   | 27 | 1 |
| gij1817678  | POSSIBLE CONSERVED MEMBRANE PROTEIN [Mycobacterium tuberculosis H37Rv]                                 | 26 | 7 |
| gij41352759 | NADPH-DEPENDENT MYCOTHIOIOL REDUCTASE MTR [Mycobacterium tuberculosis H37Rv]                           | 26 | 3 |
| gij1806191  | PROBABLE 50S RIBOSOMAL PROTEIN L15 RPLO [Mycobacterium tuberculosis H37Rv]                             | 24 | 4 |
| gij2924437  | CONSERVED HYPOTHETICAL INTEGRAL MEMBRANE PROTEIN YRBE4B [Mycobacterium tuberculosis H37Rv]             | 24 | 5 |
| gij1781214  | PROBABLE NADH DEHYDROGENASE I (CHAIN J) NUOJ (NADH-UBIQUINONE OXIDOREDUCTASE CHAIN J) [Mycobacterium   | 24 | 2 |
| gij2909598  | POSSIBLE CONSERVED TRANSMEMBRANE PROTEIN [Mycobacterium tuberculosis H37Rv]                            | 22 | 2 |
| gij38490223 | PROBABLE METHIONINE AMINOPEPTIDASE MAPA (MAP) (PEPTIDASE M) (MetAP) [Mycobacterium tuberculosis H37Rv] | 21 | 5 |
| gij2909518  | CONSERVED HYPOTHETICAL PROTEIN [Mycobacterium tuberculosis H37Rv]                                      | 20 | 1 |
| gij41352784 | POSSIBLE MULTIFUNCTIONAL ENZYME SIROHEME SYNTHASE CYSG: UROPORPHYRIN-III C-METHYLTRANSFERASE (UF       | 18 | 4 |
| gij2896765  | CONSERVED HYPOTHETICAL PROTEIN [Mycobacterium tuberculosis H37Rv]                                      | 17 | 6 |

---

**Supporting Table 6. *M. smegmatis* cellular proteins**

| <b>Accession number</b> | <b>Protein name</b>                                                                             | <b>Score</b> | <b>Unique peptides</b> |
|-------------------------|-------------------------------------------------------------------------------------------------|--------------|------------------------|
| gij118469510            | chaperonin GroEL [Mycobacterium smegmatis str. MC2 155]                                         | 3302         | 83                     |
| gij118471088            | elongation factor Tu [Mycobacterium smegmatis str. MC2 155]                                     | 3171         | 105                    |
| gij118469921            | glycerol kinase [Mycobacterium smegmatis str. MC2 155]                                          | 3039         | 89                     |
| gij118467920            | fatty acid synthase [Mycobacterium smegmatis str. MC2 155]                                      | 2078         | 82                     |
| gij118473120            | secreted protein [Mycobacterium smegmatis str. MC2 155]                                         | 1946         | 57                     |
| gij118469856            | alcohol dehydrogenase [Mycobacterium smegmatis str. MC2 155]                                    | 1891         | 54                     |
| gij118467956            | glutamine synthetase, type I [Mycobacterium smegmatis str. MC2 155]                             | 1763         | 59                     |
| gij118469216            | chaperonin GroEL [Mycobacterium smegmatis str. MC2 155]                                         | 1732         | 49                     |
| gij118467799            | glyceraldehyde-3-phosphate dehydrogenase, type I [Mycobacterium smegmatis str. MC2 155]         | 1702         | 38                     |
| gij118469768            | DNA-directed RNA polymerase subunit beta~ [Mycobacterium smegmatis str. MC2 155]                | 1598         | 80                     |
| gij118472509            | negative regulator of genetic competence ClpC/mecB [Mycobacterium smegmatis str. MC2 155]       | 1545         | 49                     |
| gij118473102            | transketolase [Mycobacterium smegmatis str. MC2 155]                                            | 1485         | 47                     |
| gij118467432            | isocitrate dehydrogenase, NADP-dependent [Mycobacterium smegmatis str. MC2 155]                 | 1481         | 49                     |
| gij118471656            | alcohol dehydrogenase, iron-containing [Mycobacterium smegmatis str. MC2 155]                   | 1402         | 42                     |
| gij118468193            | elongation factor Ts [Mycobacterium smegmatis str. MC2 155]                                     | 1281         | 35                     |
| gij118468129            | DNA-directed RNA polymerase subunit beta [Mycobacterium smegmatis str. MC2 155]                 | 1185         | 52                     |
| gij118472813            | 30S ribosomal protein S1 [Mycobacterium smegmatis str. MC2 155]                                 | 1029         | 40                     |
| gij118471676            | aconitate hydratase 1 [Mycobacterium smegmatis str. MC2 155]                                    | 996          | 39                     |
| gij118471177            | fructose-1,6-bisphosphate aldolase [Mycobacterium smegmatis str. MC2 155]                       | 939          | 23                     |
| gij118471849            | F0F1 ATP synthase subunit beta [Mycobacterium smegmatis str. MC2 155]                           | 909          | 28                     |
| gij118470966            | alcohol dehydrogenase, class IV [Mycobacterium smegmatis str. MC2 155]                          | 868          | 34                     |
| gij118469852            | succinyl-CoA synthetase subunit alpha [Mycobacterium smegmatis str. MC2 155]                    | 826          | 21                     |
| gij118469254            | electron transfer flavoprotein, beta subunit [Mycobacterium smegmatis str. MC2 155]             | 802          | 23                     |
| gij118472263            | 50S ribosomal protein L2 [Mycobacterium smegmatis str. MC2 155]                                 | 802          | 30                     |
| gij118472182            | ketol-acid reductoisomerase [Mycobacterium smegmatis str. MC2 155]                              | 800          | 25                     |
| gij118471525            | ABC-type amino acid transport system, secreted component [Mycobacterium smegmatis str. MC2 155] | 799          | 15                     |
| gij118469108            | acetyl-propionyl-coenzyme A carboxylase alpha chain [Mycobacterium smegmatis str. MC2 155]      | 790          | 30                     |
| gij118468850            | sulfate-binding protein [Mycobacterium smegmatis str. MC2 155]                                  | 775          | 23                     |
| gij118471339            | DNA-binding protein HU [Mycobacterium smegmatis str. MC2 155]                                   | 773          | 30                     |
| gij118472055            | alpha-ketoglutarate decarboxylase [Mycobacterium smegmatis str. MC2 155]                        | 766          | 33                     |
| gij118473196            | 50S ribosomal protein L1 [Mycobacterium smegmatis str. MC2 155]                                 | 758          | 24                     |
| gij118471055            | dihydrolipoamide acetyltransferase [Mycobacterium smegmatis str. MC2 155]                       | 742          | 22                     |
| gij118471172            | 3-oxoacyl-(acyl carrier protein) synthase II [Mycobacterium smegmatis str. MC2 155]             | 729          | 19                     |
| gij118469915            | 30S ribosomal protein S2 [Mycobacterium smegmatis str. MC2 155]                                 | 712          | 29                     |
| gij118470425            | methoxy mycolic acid synthase 1 [Mycobacterium smegmatis str. MC2 155]                          | 678          | 23                     |
| gij118469023            | transcriptional regulator, Crp/Fnr family protein [Mycobacterium smegmatis str. MC2 155]        | 664          | 24                     |
| gij118471409            | electron transfer flavoprotein, alpha subunit [Mycobacterium smegmatis str. MC2 155]            | 643          | 16                     |

|              |                                                                                                            |     |    |
|--------------|------------------------------------------------------------------------------------------------------------|-----|----|
| gij118469725 | malate synthase G [Mycobacterium smegmatis str. MC2 155]                                                   | 635 | 23 |
| gij118470564 | branched-chain amino acid ABC transporter substrate-binding protein [Mycobacterium smegmatis str. MC2 155] | 634 | 16 |
| gij118472423 | molecular chaperone DnaK [Mycobacterium smegmatis str. MC2 155]                                            | 630 | 28 |
| gij118472444 | glycerol-3-phosphate dehydrogenase 2 [Mycobacterium smegmatis str. MC2 155]                                | 629 | 27 |
| gij118471714 | trigger factor [Mycobacterium smegmatis str. MC2 155]                                                      | 620 | 15 |
| gij118472788 | putative thiosulfate sulfurtransferase [Mycobacterium smegmatis str. MC2 155]                              | 606 | 31 |
| gij118468422 | peptidyl-prolyl cis-trans isomerase B [Mycobacterium smegmatis str. MC2 155]                               | 585 | 16 |
| gij118470200 | transaldolase [Mycobacterium smegmatis str. MC2 155]                                                       | 584 | 22 |
| gij118470248 | glutamate binding protein [Mycobacterium smegmatis str. MC2 155]                                           | 583 | 14 |
| gij118471749 | phosphopyruvate hydratase [Mycobacterium smegmatis str. MC2 155]                                           | 570 | 19 |
| gij118471281 | polynucleotide phosphorylase/polyadenylase [Mycobacterium smegmatis str. MC2 155]                          | 561 | 22 |
| gij118469786 | succinyl-CoA synthetase subunit beta [Mycobacterium smegmatis str. MC2 155]                                | 559 | 16 |
| gij118471400 | 50S ribosomal protein L17 [Mycobacterium smegmatis str. MC2 155]                                           | 549 | 15 |
| gij118471197 | transcription termination factor Rho [Mycobacterium smegmatis str. MC2 155]                                | 545 | 17 |
| gij118473144 | adenylate kinase [Mycobacterium smegmatis str. MC2 155]                                                    | 544 | 16 |
| gij118467390 | sulfonate binding protein [Mycobacterium smegmatis str. MC2 155]                                           | 525 | 10 |
| gij118471486 | alkylhydroperoxide reductase [Mycobacterium smegmatis str. MC2 155]                                        | 519 | 20 |
| gij118468007 | S-adenosylmethionine synthetase [Mycobacterium smegmatis str. MC2 155]                                     | 510 | 15 |
| gij118471051 | 2,3-bisphosphoglycerate-dependent phosphoglycerate mutase [Mycobacterium smegmatis str. MC2 155]           | 506 | 23 |
| gij118470491 | type II citrate synthase [Mycobacterium smegmatis str. MC2 155]                                            | 491 | 22 |
| gij118467594 | eptc-inducible aldehyde dehydrogenase [Mycobacterium smegmatis str. MC2 155]                               | 488 | 16 |
| gij118469481 | acetyl-CoA acetyltransferase [Mycobacterium smegmatis str. MC2 155]                                        | 487 | 14 |
| gij118470335 | extracellular solute-binding protein, family protein 5, putative [Mycobacterium smegmatis str. MC2 155]    | 480 | 10 |
| gij118470637 | DivIVA protein [Mycobacterium smegmatis str. MC2 155]                                                      | 477 | 14 |
| gij118469591 | polyketide synthase [Mycobacterium smegmatis str. MC2 155]                                                 | 476 | 28 |
| gij118469556 | DNA-directed RNA polymerase subunit alpha [Mycobacterium smegmatis str. MC2 155]                           | 472 | 15 |
| gij118473128 | 50S ribosomal protein L10 [Mycobacterium smegmatis str. MC2 155]                                           | 466 | 16 |
| gij118468923 | 35 kDa protein [Mycobacterium smegmatis str. MC2 155]                                                      | 458 | 16 |
| gij118471041 | 50S ribosomal protein L6 [Mycobacterium smegmatis str. MC2 155]                                            | 458 | 13 |
| gij118470856 | pyruvate kinase [Mycobacterium smegmatis str. MC2 155]                                                     | 451 | 16 |
| gij118473190 | 50S ribosomal protein L3 [Mycobacterium smegmatis str. MC2 155]                                            | 442 | 16 |
| gij118473447 | putative periplasmic binding protein [Mycobacterium smegmatis str. MC2 155]                                | 442 | 11 |
| gij118468301 | 30S ribosomal protein S4 [Mycobacterium smegmatis str. MC2 155]                                            | 432 | 24 |
| gij118471064 | enoyl-(acyl carrier protein) reductase [Mycobacterium smegmatis str. MC2 155]                              | 427 | 16 |
| gij118473252 | starvation-induced DNA protecting protein [Mycobacterium smegmatis str. MC2 155]                           | 425 | 18 |
| gij118472900 | 50S ribosomal protein L5 [Mycobacterium smegmatis str. MC2 155]                                            | 418 | 17 |
| gij118468034 | ribonucleotide-diphosphate reductase subunit alpha [Mycobacterium smegmatis str. MC2 155]                  | 411 | 16 |
| gij118467381 | leucyl aminopeptidase [Mycobacterium smegmatis str. MC2 155]                                               | 392 | 13 |
| gij118470249 | eptc-inducible aldehyde dehydrogenase [Mycobacterium smegmatis str. MC2 155]                               | 392 | 20 |
| gij118468744 | antigen 85-A [Mycobacterium smegmatis str. MC2 155]                                                        | 392 | 12 |
| gij118470088 | 50S ribosomal protein L4 [Mycobacterium smegmatis str. MC2 155]                                            | 391 | 18 |

|              |                                                                                             |     |    |
|--------------|---------------------------------------------------------------------------------------------|-----|----|
| gij118467618 | 30S ribosomal protein S16 [Mycobacterium smegmatis str. MC2 155]                            | 384 | 9  |
| gij118467392 | aminopeptidase N [Mycobacterium smegmatis str. MC2 155]                                     | 382 | 15 |
| gij118468477 | ribosomal protein S9 [Mycobacterium smegmatis str. MC2 155]                                 | 380 | 17 |
| gij118471723 | 2,5-diketo-D-gluconic acid reductase A [Mycobacterium smegmatis str. MC2 155]               | 378 | 10 |
| gij118469641 | 30S ribosomal protein S5 [Mycobacterium smegmatis str. MC2 155]                             | 378 | 16 |
| gij118473160 | 30S ribosomal protein S3 [Mycobacterium smegmatis str. MC2 155]                             | 371 | 25 |
| gij118469528 | carbamoyl phosphate synthase large subunit [Mycobacterium smegmatis str. MC2 155]           | 368 | 20 |
| gij118470644 | myo-inositol-1-phosphate synthase [Mycobacterium smegmatis str. MC2 155]                    | 362 | 19 |
| gij118469699 | phosphoglycerate kinase [Mycobacterium smegmatis str. MC2 155]                              | 362 | 10 |
| gij118471917 | propionyl-CoA carboxylase beta chain [Mycobacterium smegmatis str. MC2 155]                 | 360 | 9  |
| gij118472596 | dihydroliipoamide dehydrogenase [Mycobacterium smegmatis str. MC2 155]                      | 359 | 15 |
| gij118467508 | geranylgeranyl reductase [Mycobacterium smegmatis str. MC2 155]                             | 357 | 10 |
| gij118469548 | universal stress protein family protein [Mycobacterium smegmatis str. MC2 155]              | 354 | 9  |
| gij118473759 | ubiquinol-cytochrome c reductase iron-sulfur subunit [Mycobacterium smegmatis str. MC2 155] | 352 | 15 |
| gij118472552 | hypothetical protein MSMEG_5246 [Mycobacterium smegmatis str. MC2 155]                      | 346 | 16 |
| gij118471482 | ATP-dependent Clp protease proteolytic subunit [Mycobacterium smegmatis str. MC2 155]       | 342 | 9  |
| gij118469532 | FeS assembly ATPase SufC [Mycobacterium smegmatis str. MC2 155]                             | 340 | 9  |
| gij118473057 | 50S ribosomal protein L25/general stress protein Ctc [Mycobacterium smegmatis str. MC2 155] | 328 | 15 |
| gij118470567 | DNA gyrase subunit B [Mycobacterium smegmatis str. MC2 155]                                 | 328 | 23 |
| gij118473766 | hypothetical protein MSMEG_2450 [Mycobacterium smegmatis str. MC2 155]                      | 319 | 12 |
| gij118467515 | acetyl-CoA acetyltransferase [Mycobacterium smegmatis str. MC2 155]                         | 312 | 14 |
| gij118472968 | fumarate hydratase [Mycobacterium smegmatis str. MC2 155]                                   | 308 | 20 |
| gij118467355 | acetyl-coenzyme A synthetase [Mycobacterium smegmatis str. MC2 155]                         | 308 | 17 |
| gij118471852 | acyl-CoA synthetase [Mycobacterium smegmatis str. MC2 155]                                  | 305 | 15 |
| gij118473588 | phosphoribosylformylglycinamide synthase II [Mycobacterium smegmatis str. MC2 155]          | 300 | 11 |
| gij118471761 | catalase/oxidase HPI [Mycobacterium smegmatis str. MC2 155]                                 | 300 | 11 |
| gij118473709 | antigen 85-C [Mycobacterium smegmatis str. MC2 155]                                         | 295 | 8  |
| gij118471745 | universal stress protein family protein [Mycobacterium smegmatis str. MC2 155]              | 294 | 13 |
| gij118470627 | F0F1 ATP synthase subunit alpha [Mycobacterium smegmatis str. MC2 155]                      | 290 | 12 |
| gij118469118 | translation initiation factor IF-2 [Mycobacterium smegmatis str. MC2 155]                   | 287 | 9  |
| gij118468008 | linear gramicidin synthetase subunit D [Mycobacterium smegmatis str. MC2 155]               | 287 | 18 |
| gij118469767 | [Mn] superoxide dismutase [Mycobacterium smegmatis str. MC2 155]                            | 277 | 12 |
| gij118467417 | glycerol kinase [Mycobacterium smegmatis str. MC2 155]                                      | 277 | 20 |
| gij118471642 | iron-sulfur cluster-binding protein [Mycobacterium smegmatis str. MC2 155]                  | 268 | 10 |
| gij118473731 | short chain dehydrogenase [Mycobacterium smegmatis str. MC2 155]                            | 264 | 9  |
| gij118472731 | cytochrome c oxidase subunit 2 [Mycobacterium smegmatis str. MC2 155]                       | 249 | 5  |
| gij118469115 | 50S ribosomal protein L22 [Mycobacterium smegmatis str. MC2 155]                            | 246 | 11 |
| gij118469821 | succinate dehydrogenase iron-sulfur subunit [Mycobacterium smegmatis str. MC2 155]          | 242 | 10 |
| gij118469926 | O-acetylhomoserine aminocarboxypropyltransferase [Mycobacterium smegmatis str. MC2 155]     | 241 | 9  |
| gij118467781 | hypothetical protein MSMEG_5792 [Mycobacterium smegmatis str. MC2 155]                      | 236 | 7  |
| gij118472895 | hypothetical protein MSMEG_1680 [Mycobacterium smegmatis str. MC2 155]                      | 231 | 6  |

|              |                                                                                             |     |    |
|--------------|---------------------------------------------------------------------------------------------|-----|----|
| gij118471043 | nucleoside-diphosphate-sugar epimerase [Mycobacterium smegmatis str. MC2 155]               | 230 | 7  |
| gij118469836 | methylmalonate-semialdehyde dehydrogenase [Mycobacterium smegmatis str. MC2 155]            | 229 | 10 |
| gij118472963 | hypothetical protein MSMEG_3620 [Mycobacterium smegmatis str. MC2 155]                      | 221 | 5  |
| gij118472072 | immunogenic protein MPT63 [Mycobacterium smegmatis str. MC2 155]                            | 220 | 5  |
| gij118467449 | inositol-5-monophosphate dehydrogenase [Mycobacterium smegmatis str. MC2 155]               | 220 | 14 |
| gij118473013 | acyl-[ACP] desaturase [Mycobacterium smegmatis str. MC2 155]                                | 218 | 7  |
| gij118467666 | dihydroxyacetone kinase, L subunit [Mycobacterium smegmatis str. MC2 155]                   | 218 | 6  |
| gij118472629 | ribosome recycling factor [Mycobacterium smegmatis str. MC2 155]                            | 218 | 14 |
| gij118473568 | copper/zinc superoxide dismutase [Mycobacterium smegmatis str. MC2 155]                     | 216 | 7  |
| gij118470886 | integral membrane protein [Mycobacterium smegmatis str. MC2 155]                            | 210 | 9  |
| gij118471699 | triosephosphate isomerase [Mycobacterium smegmatis str. MC2 155]                            | 210 | 18 |
| gij118470078 | monooxygenase [Mycobacterium smegmatis str. MC2 155]                                        | 205 | 11 |
| gij118472344 | hypothetical protein MSMEG_0948 [Mycobacterium smegmatis str. MC2 155]                      | 196 | 5  |
| gij118473859 | isochorismatase hydrolase [Mycobacterium smegmatis str. MC2 155]                            | 192 | 9  |
| gij118470552 | hypothetical protein MSMEG_2739 [Mycobacterium smegmatis str. MC2 155]                      | 191 | 5  |
| gij118468811 | LprG protein [Mycobacterium smegmatis str. MC2 155]                                         | 191 | 12 |
| gij118472424 | hypothetical protein MSMEG_6365 [Mycobacterium smegmatis str. MC2 155]                      | 187 | 6  |
| gij118472853 | putative non-ribosomal peptide synthase [Mycobacterium smegmatis str. MC2 155]              | 186 | 13 |
| gij118472151 | protein RecA [Mycobacterium smegmatis str. MC2 155]                                         | 185 | 3  |
| gij118467737 | antigen 85-C [Mycobacterium smegmatis str. MC2 155]                                         | 184 | 5  |
| gij118468959 | ferritin family protein [Mycobacterium smegmatis str. MC2 155]                              | 182 | 9  |
| gij118472339 | transcriptional accessory protein [Mycobacterium smegmatis str. MC2 155]                    | 182 | 14 |
| gij118469999 | phosphonoacetaldehyde hydrolase [Mycobacterium smegmatis str. MC2 155]                      | 180 | 6  |
| gij118467664 | ATP:cob(I)alamin adenosyltransferase [Mycobacterium smegmatis str. MC2 155]                 | 177 | 6  |
| gij118471822 | peptide synthetase [Mycobacterium smegmatis str. MC2 155]                                   | 176 | 14 |
| gij118467503 | hypothetical protein MSMEG_1959 [Mycobacterium smegmatis str. MC2 155]                      | 175 | 12 |
| gij118473140 | universal stress protein family protein [Mycobacterium smegmatis str. MC2 155]              | 174 | 4  |
| gij118471352 | R3H domain-containing protein [Mycobacterium smegmatis str. MC2 155]                        | 174 | 5  |
| gij118471786 | FHA domain-containing protein [Mycobacterium smegmatis str. MC2 155]                        | 172 | 3  |
| gij118468078 | succinate dehydrogenase flavoprotein subunit [Mycobacterium smegmatis str. MC2 155]         | 172 | 11 |
| gij118467606 | propanediol utilization: dehydratase, medium subunit [Mycobacterium smegmatis str. MC2 155] | 170 | 6  |
| gij118473255 | FOF1 ATP synthase subunit gamma [Mycobacterium smegmatis str. MC2 155]                      | 165 | 7  |
| gij118473442 | morphine 6-dehydrogenase [Mycobacterium smegmatis str. MC2 155]                             | 165 | 10 |
| gij118473678 | ATP-dependent Clp protease proteolytic subunit [Mycobacterium smegmatis str. MC2 155]       | 165 | 9  |
| gij118472168 | indole-3-glycerol-phosphate synthase [Mycobacterium smegmatis str. MC2 155]                 | 164 | 4  |
| gij118467701 | universal stress protein family protein [Mycobacterium smegmatis str. MC2 155]              | 162 | 12 |
| gij118472545 | [Mn] superoxide dismutase [Mycobacterium smegmatis str. MC2 155]                            | 162 | 5  |
| gij118469232 | ribonucleotide-diphosphate reductase subunit beta [Mycobacterium smegmatis str. MC2 155]    | 160 | 8  |
| gij118470522 | isopropylmalate isomerase small subunit [Mycobacterium smegmatis str. MC2 155]              | 159 | 4  |
| gij118470577 | pyruvate dehydrogenase subunit E1 [Mycobacterium smegmatis str. MC2 155]                    | 158 | 17 |
| gij118471814 | forkhead-associated protein [Mycobacterium smegmatis str. MC2 155]                          | 157 | 4  |

|              |                                                                                                             |     |    |
|--------------|-------------------------------------------------------------------------------------------------------------|-----|----|
| gij118467544 | tetrahydrofolate dehydrogenase/cyclohydrolase F <sub>o</sub> D [Mycobacterium smegmatis str. MC2 155]       | 156 | 8  |
| gij118467655 | 3-oxoacyl-(acyl carrier protein) synthase II [Mycobacterium smegmatis str. MC2 155]                         | 155 | 9  |
| gij118470882 | immunogenic protein MPB64/MPT64 [Mycobacterium smegmatis str. MC2 155]                                      | 154 | 4  |
| gij118471239 | D-3-phosphoglycerate dehydrogenase [Mycobacterium smegmatis str. MC2 155]                                   | 150 | 8  |
| gij118473243 | propionyl-CoA carboxylase beta chain [Mycobacterium smegmatis str. MC2 155]                                 | 150 | 13 |
| gij118467540 | Sua5/YciO/YrdC/YwlC family protein [Mycobacterium smegmatis str. MC2 155]                                   | 148 | 2  |
| gij118468168 | acetyl-CoA acetyltransferase [Mycobacterium smegmatis str. MC2 155]                                         | 148 | 6  |
| gij118472894 | F420-dependent glucose-6-phosphate dehydrogenase [Mycobacterium smegmatis str. MC2 155]                     | 147 | 11 |
| gij118473192 | 3-hydroxyacyl-CoA dehydrogenase [Mycobacterium smegmatis str. MC2 155]                                      | 146 | 8  |
| gij118473027 | aspartate-semialdehyde dehydrogenase [Mycobacterium smegmatis str. MC2 155]                                 | 141 | 4  |
| gij118473695 | [NADP+] succinate-semialdehyde dehydrogenase [Mycobacterium smegmatis str. MC2 155]                         | 138 | 4  |
| gij118467925 | ABC-type molybdenum transport system, ATPase component [Mycobacterium smegmatis str. MC2 155]               | 138 | 6  |
| gij118468997 | sodium:solute symporter [Mycobacterium smegmatis str. MC2 155]                                              | 137 | 9  |
| gij118472532 | NAD/mycothiol-dependent formaldehyde dehydrogenase [Mycobacterium smegmatis str. MC2 155]                   | 136 | 5  |
| gij118468060 | ferredoxin-dependent glutamate synthase 1 [Mycobacterium smegmatis str. MC2 155]                            | 136 | 16 |
| gij118468373 | cation ABC transporter, periplasmic cation-binding protein, putative [Mycobacterium smegmatis str. MC2 155] | 134 | 3  |
| gij118470740 | hypothetical protein MSMEG_1244 [Mycobacterium smegmatis str. MC2 155]                                      | 131 | 15 |
| gij118468465 | heparin-binding hemagglutinin [Mycobacterium smegmatis str. MC2 155]                                        | 131 | 6  |
| gij118468145 | bacterioferritin [Mycobacterium smegmatis str. MC2 155]                                                     | 130 | 6  |
| gij118470193 | phosphomethylpyrimidine kinase [Mycobacterium smegmatis str. MC2 155]                                       | 127 | 2  |
| gij118470308 | alpha-glucan phosphorylase family protein [Mycobacterium smegmatis str. MC2 155]                            | 125 | 13 |
| gij118468878 | hypothetical protein MSMEG_2782 [Mycobacterium smegmatis str. MC2 155]                                      | 123 | 9  |
| gij118469046 | hypothetical protein MSMEG_5715 [Mycobacterium smegmatis str. MC2 155]                                      | 118 | 7  |
| gij118469602 | 3-hydroxybutyryl-CoA dehydrogenase [Mycobacterium smegmatis str. MC2 155]                                   | 118 | 2  |
| gij118468818 | serine hydroxymethyltransferase [Mycobacterium smegmatis str. MC2 155]                                      | 117 | 5  |
| gij118469194 | F <sub>o</sub> F <sub>1</sub> ATP synthase subunit delta [Mycobacterium smegmatis str. MC2 155]             | 117 | 5  |
| gij118471928 | malonyl CoA-acyl carrier protein transacylase [Mycobacterium smegmatis str. MC2 155]                        | 117 | 7  |
| gij118469543 | ferredoxin [Mycobacterium smegmatis str. MC2 155]                                                           | 116 | 3  |
| gij118467811 | DNA gyrase subunit A [Mycobacterium smegmatis str. MC2 155]                                                 | 115 | 13 |
| gij118469171 | translation initiation factor IF-3 [Mycobacterium smegmatis str. MC2 155]                                   | 114 | 3  |
| gij118467842 | hypothetical protein MSMEG_4631 [Mycobacterium smegmatis str. MC2 155]                                      | 113 | 3  |
| gij118468786 | cobalamin synthesis protein/P47K [Mycobacterium smegmatis str. MC2 155]                                     | 113 | 3  |
| gij118473119 | <b>lipoprotein, nlpa family protein [Mycobacterium smegmatis str. MC2 155]</b>                              | 112 | 5  |
| gij118467795 | hypothetical protein MSMEG_2940 [Mycobacterium smegmatis str. MC2 155]                                      | 112 | 4  |
| gij118468649 | tuberculin related peptide [Mycobacterium smegmatis str. MC2 155]                                           | 111 | 2  |
| gij118472021 | ATPase associated with various cellular activities, AAA-5 [Mycobacterium smegmatis str. MC2 155]            | 111 | 4  |
| gij118471302 | 30S ribosomal protein S12 [Mycobacterium smegmatis str. MC2 155]                                            | 111 | 6  |
| gij118469435 | single-strand DNA-binding protein [Mycobacterium smegmatis str. MC2 155]                                    | 110 | 5  |
| gij118472299 | PTS system, glucose-specific IIBC component [Mycobacterium smegmatis str. MC2 155]                          | 110 | 5  |
| gij118469884 | FMN-dependent dehydrogenase [Mycobacterium smegmatis str. MC2 155]                                          | 110 | 7  |
| gij118471565 | fructose 1,6-bisphosphatase II [Mycobacterium smegmatis str. MC2 155]                                       | 108 | 10 |

|              |                                                                                                                     |     |    |
|--------------|---------------------------------------------------------------------------------------------------------------------|-----|----|
| gij118470801 | ATPase, AAA family protein [Mycobacterium smegmatis str. MC2 155]                                                   | 107 | 9  |
| gij118471646 | type I modular polyketide synthase [Mycobacterium smegmatis str. MC2 155]                                           | 106 | 22 |
| gij118472891 | ubiquinol-cytochrome c reductase cytochrome c subunit [Mycobacterium smegmatis str. MC2 155]                        | 105 | 1  |
| gij118473106 | cell division protein [Mycobacterium smegmatis str. MC2 155]                                                        | 105 | 9  |
| gij118470244 | bifunctional udp-galactofuranosyl transferase glft [Mycobacterium smegmatis str. MC2 155]                           | 105 | 5  |
| gij118472776 | NAD(P) transhydrogenase subunit alpha [Mycobacterium smegmatis str. MC2 155]                                        | 105 | 9  |
| gij118473594 | orotate phosphoribosyltransferase [Mycobacterium smegmatis str. MC2 155]                                            | 104 | 6  |
| gij118468522 | co-chaperone GrpE [Mycobacterium smegmatis str. MC2 155]                                                            | 103 | 5  |
| gij118471944 | ferredoxin sulfite reductase [Mycobacterium smegmatis str. MC2 155]                                                 | 101 | 16 |
| gij118471316 | short chain dehydrogenase [Mycobacterium smegmatis str. MC2 155]                                                    | 101 | 5  |
| gij118470670 | peptide deformylase [Mycobacterium smegmatis str. MC2 155]                                                          | 100 | 1  |
| gij118472437 | hypothetical protein MSMEG_5225 [Mycobacterium smegmatis str. MC2 155]                                              | 100 | 3  |
| gij118471300 | binding-protein-dependent transport systems inner membrane component [Mycobacterium smegmatis str. MC2 155]         | 100 | 4  |
| gij118473956 | pyruvate synthase [Mycobacterium smegmatis str. MC2 155]                                                            | 99  | 12 |
| gij118472079 | hypothetical protein MSMEG_3489 [Mycobacterium smegmatis str. MC2 155]                                              | 99  | 7  |
| gij118471625 | enoyl-CoA hydratase [Mycobacterium smegmatis str. MC2 155]                                                          | 97  | 6  |
| gij118473206 | glycine cleavage system aminomethyltransferase T [Mycobacterium smegmatis str. MC2 155]                             | 97  | 3  |
| gij118471509 | isocitrate lyase [Mycobacterium smegmatis str. MC2 155]                                                             | 97  | 4  |
| gij118472457 | putative thiosulfate sulfurtransferase [Mycobacterium smegmatis str. MC2 155]                                       | 96  | 6  |
| gij118470103 | ATPase involved in DNA repair [Mycobacterium smegmatis str. MC2 155]                                                | 96  | 10 |
| gij118472513 | phosphoribosylformylglycinamide synthase subunit I [Mycobacterium smegmatis str. MC2 155]                           | 96  | 3  |
| gij118473288 | 2-dehydro-3-deoxyphosphogluconate aldolase/4-hydroxy-2-oxoglutarate aldolase [Mycobacterium smegmatis str. MC2 155] | 96  | 3  |
| gij118471368 | threonyl-tRNA synthetase [Mycobacterium smegmatis str. MC2 155]                                                     | 95  | 8  |
| gij118472220 | pyrroline-5-carboxylate reductase [Mycobacterium smegmatis str. MC2 155]                                            | 95  | 10 |
| gij118471103 | propionyl-CoA carboxylase beta chain [Mycobacterium smegmatis str. MC2 155]                                         | 95  | 4  |
| gij118471254 | porin [Mycobacterium smegmatis str. MC2 155]                                                                        | 95  | 4  |
| gij118472131 | hypothetical protein MSMEG_6329 [Mycobacterium smegmatis str. MC2 155]                                              | 94  | 5  |
| gij118469201 | leucyl-tRNA synthetase [Mycobacterium smegmatis str. MC2 155]                                                       | 93  | 8  |
| gij118469785 | deoxycytidine triphosphate deaminase [Mycobacterium smegmatis str. MC2 155]                                         | 92  | 5  |
| gij118473366 | signal recognition particle-docking protein FtsY [Mycobacterium smegmatis str. MC2 155]                             | 91  | 3  |
| gij118473826 | secreted protein [Mycobacterium smegmatis str. MC2 155]                                                             | 91  | 3  |
| gij118472725 | adenylosuccinate synthetase [Mycobacterium smegmatis str. MC2 155]                                                  | 90  | 7  |
| gij118470287 | glycine dehydrogenase [Mycobacterium smegmatis str. MC2 155]                                                        | 90  | 3  |
| gij118468031 | hydrolase [Mycobacterium smegmatis str. MC2 155]                                                                    | 89  | 2  |
| gij118468739 | forkhead-associated protein [Mycobacterium smegmatis str. MC2 155]                                                  | 89  | 4  |
| gij118467446 | phosphoserine aminotransferase [Mycobacterium smegmatis str. MC2 155]                                               | 88  | 2  |
| gij118471957 | macrocin-O-methyltransferase [Mycobacterium smegmatis str. MC2 155]                                                 | 87  | 5  |
| gij118471438 | ubiquinol-cytochrome c reductase cytochrome b subunit [Mycobacterium smegmatis str. MC2 155]                        | 87  | 4  |
| gij118470647 | nucleotide-binding protein [Mycobacterium smegmatis str. MC2 155]                                                   | 87  | 2  |
| gij118469633 | 3-oxoacyl-(acyl-carrier-protein) reductase [Mycobacterium smegmatis str. MC2 155]                                   | 86  | 5  |
| gij118469973 | acetyl-CoA acetyltransferase [Mycobacterium smegmatis str. MC2 155]                                                 | 86  | 2  |

|              |                                                                                           |    |    |
|--------------|-------------------------------------------------------------------------------------------|----|----|
| gij118474029 | antigen MTB48 [Mycobacterium smegmatis str. MC2 155]                                      | 86 | 3  |
| gij118471914 | aspartyl-tRNA synthetase [Mycobacterium smegmatis str. MC2 155]                           | 85 | 5  |
| gij118469318 | transcriptional regulatory protein [Mycobacterium smegmatis str. MC2 155]                 | 85 | 5  |
| gij118473752 | phosphoribosylamine--glycine ligase [Mycobacterium smegmatis str. MC2 155]                | 85 | 4  |
| gij118470192 | arabinosyltransferase A [Mycobacterium smegmatis str. MC2 155]                            | 84 | 10 |
| gij118474021 | glutamine synthetase, type I [Mycobacterium smegmatis str. MC2 155]                       | 82 | 5  |
| gij118470446 | hypothetical protein MSMEG_1931 [Mycobacterium smegmatis str. MC2 155]                    | 82 | 1  |
| gij118472063 | serine esterase, cutinase family protein [Mycobacterium smegmatis str. MC2 155]           | 82 | 3  |
| gij118467493 | MmpL4 protein [Mycobacterium smegmatis str. MC2 155]                                      | 81 | 10 |
| gij118467934 | MmpL4 protein [Mycobacterium smegmatis str. MC2 155]                                      | 81 | 6  |
| gij118470186 | uracil phosphoribosyltransferase [Mycobacterium smegmatis str. MC2 155]                   | 79 | 5  |
| gij118469816 | response regulator [Mycobacterium smegmatis str. MC2 155]                                 | 79 | 3  |
| gij118468368 | pyridine nucleotide-disulphide oxidoreductase [Mycobacterium smegmatis str. MC2 155]      | 78 | 7  |
| gij118472342 | hypothetical protein MSMEG_0067 [Mycobacterium smegmatis str. MC2 155]                    | 78 | 6  |
| gij118473047 | ABC transporter, ATP-binding protein SugC [Mycobacterium smegmatis str. MC2 155]          | 77 | 5  |
| gij118471284 | cyclase/dehydrase [Mycobacterium smegmatis str. MC2 155]                                  | 77 | 4  |
| gij118470848 | <b>polyamine-binding lipoprotein [Mycobacterium smegmatis str. MC2 155]</b>               | 77 | 5  |
| gij118468148 | carbonic anhydrase [Mycobacterium smegmatis str. MC2 155]                                 | 77 | 2  |
| gij118468481 | preprotein translocase subunit SecE [Mycobacterium smegmatis str. MC2 155]                | 76 | 3  |
| gij118471837 | preprotein translocase subunit SecA [Mycobacterium smegmatis str. MC2 155]                | 76 | 9  |
| gij118470710 | ribose-phosphate pyrophosphokinase [Mycobacterium smegmatis str. MC2 155]                 | 75 | 2  |
| gij118472454 | nitroreductase family protein [Mycobacterium smegmatis str. MC2 155]                      | 75 | 5  |
| gij118468533 | DNA-damage-inducible protein [Mycobacterium smegmatis str. MC2 155]                       | 75 | 10 |
| gij118472042 | SAM-dependent methyltransferase [Mycobacterium smegmatis str. MC2 155]                    | 75 | 2  |
| gij118469404 | NADH dehydrogenase [Mycobacterium smegmatis str. MC2 155]                                 | 74 | 6  |
| gij118473087 | pyruvate carboxylase [Mycobacterium smegmatis str. MC2 155]                               | 73 | 12 |
| gij118472561 | short chain dehydrogenase [Mycobacterium smegmatis str. MC2 155]                          | 73 | 4  |
| gij118472266 | phosphoenolpyruvate carboxykinase [Mycobacterium smegmatis str. MC2 155]                  | 73 | 5  |
| gij118467769 | methyltransferase, UbiE/COQ5 family protein [Mycobacterium smegmatis str. MC2 155]        | 73 | 4  |
| gij118468207 | serine 3-dehydrogenase [Mycobacterium smegmatis str. MC2 155]                             | 73 | 2  |
| gij118472812 | methylmalonyl-CoA mutase [Mycobacterium smegmatis str. MC2 155]                           | 72 | 5  |
| gij118469826 | hypothetical protein MSMEG_4199 [Mycobacterium smegmatis str. MC2 155]                    | 72 | 4  |
| gij118473142 | inositol-5-monophosphate dehydrogenase [Mycobacterium smegmatis str. MC2 155]             | 72 | 4  |
| gij118468125 | urease accessory protein UreG [Mycobacterium smegmatis str. MC2 155]                      | 72 | 3  |
| gij118472260 | 6-phosphogluconate dehydrogenase [Mycobacterium smegmatis str. MC2 155]                   | 72 | 2  |
| gij118471574 | glucose-6-phosphate isomerase [Mycobacterium smegmatis str. MC2 155]                      | 71 | 10 |
| gij118471372 | tyramine oxidase [Mycobacterium smegmatis str. MC2 155]                                   | 71 | 2  |
| gij118472218 | 5-carboxymethyl-2-hydroxyimuconate delta-isomerase [Mycobacterium smegmatis str. MC2 155] | 71 | 1  |
| gij118470532 | hypothetical protein MSMEG_2261 [Mycobacterium smegmatis str. MC2 155]                    | 70 | 1  |
| gij118467566 | NAD-dependent malic enzyme [Mycobacterium smegmatis str. MC2 155]                         | 70 | 1  |
| gij118471926 | ABC transporter, ATP-binding protein [Mycobacterium smegmatis str. MC2 155]               | 70 | 9  |



|              |                                                                                           |    |    |
|--------------|-------------------------------------------------------------------------------------------|----|----|
| gij118468194 | quinone oxidoreductase [Mycobacterium smegmatis str. MC2 155]                             | 70 | 6  |
| gij118468158 | NAD(P) transhydrogenase subunit alpha [Mycobacterium smegmatis str. MC2 155]              | 70 | 9  |
| gij118472687 | phenylalanyl-tRNA synthetase subunit alpha [Mycobacterium smegmatis str. MC2 155]         | 69 | 6  |
| gij118472463 | aspartyl/glutamyl-tRNA amidotransferase subunit A [Mycobacterium smegmatis str. MC2 155]  | 69 | 6  |
| gij118469316 | beta-lactamase [Mycobacterium smegmatis str. MC2 155]                                     | 69 | 7  |
| gij118467561 | antigen 85-C [Mycobacterium smegmatis str. MC2 155]                                       | 69 | 3  |
| gij118473957 | uricase [Mycobacterium smegmatis str. MC2 155]                                            | 68 | 4  |
| gij118471082 | NAD(P) transhydrogenase, beta subunit [Mycobacterium smegmatis str. MC2 155]              | 68 | 3  |
| gij118472999 | ribonuclease, Rne/Rng family protein [Mycobacterium smegmatis str. MC2 155]               | 67 | 7  |
| gij118467931 | methylmalonyl-CoA mutase, small subunit [Mycobacterium smegmatis str. MC2 155]            | 67 | 1  |
| gij118471890 | CobW/P47K domain-containing protein [Mycobacterium smegmatis str. MC2 155]                | 66 | 6  |
| gij118470626 | preprotein translocase subunit SecF [Mycobacterium smegmatis str. MC2 155]                | 66 | 4  |
| gij118473730 | hypothetical protein MSMEG_3144 [Mycobacterium smegmatis str. MC2 155]                    | 65 | 2  |
| gij118469198 | isopropylmalate isomerase large subunit [Mycobacterium smegmatis str. MC2 155]            | 65 | 7  |
| gij118469498 | phosphate transport system regulatory protein PhoU [Mycobacterium smegmatis str. MC2 155] | 65 | 2  |
| gij118468277 | putative beta-1,3-glucanase [Mycobacterium smegmatis str. MC2 155]                        | 65 | 3  |
| gij118471931 | alpha-methylacyl-CoA racemase [Mycobacterium smegmatis str. MC2 155]                      | 64 | 3  |
| gij118469253 | membrane protein [Mycobacterium smegmatis str. MC2 155]                                   | 64 | 2  |
| gij118473461 | hypothetical protein MSMEG_6434 [Mycobacterium smegmatis str. MC2 155]                    | 63 | 2  |
| gij118473166 | elongation factor P [Mycobacterium smegmatis str. MC2 155]                                | 63 | 3  |
| gij118471954 | 6-phosphogluconate dehydrogenase-like protein [Mycobacterium smegmatis str. MC2 155]      | 62 | 4  |
| gij118469646 | ribonuclease activity regulator protein RraA [Mycobacterium smegmatis str. MC2 155]       | 62 | 4  |
| gij118468049 | alcohol dehydrogenase, zinc-containing [Mycobacterium smegmatis str. MC2 155]             | 62 | 4  |
| gij118468890 | threonine synthase [Mycobacterium smegmatis str. MC2 155]                                 | 62 | 8  |
| gij118473876 | (3R)-hydroxyacyl-ACP dehydratase subunit HadA [Mycobacterium smegmatis str. MC2 155]      | 62 | 3  |
| gij118470171 | siderophore binding protein [Mycobacterium smegmatis str. MC2 155]                        | 61 | 1  |
| gij118470603 | ammonium transporter [Mycobacterium smegmatis str. MC2 155]                               | 61 | 1  |
| gij118468999 | short-chain dehydrogenase [Mycobacterium smegmatis str. MC2 155]                          | 61 | 3  |
| gij118473158 | peptide chain release factor 2 [Mycobacterium smegmatis str. MC2 155]                     | 61 | 6  |
| gij118469997 | ATPase, MoxR family protein [Mycobacterium smegmatis str. MC2 155]                        | 60 | 6  |
| gij118470151 | hypothetical protein MSMEG_1601 [Mycobacterium smegmatis str. MC2 155]                    | 60 | 1  |
| gij118470472 | protease 2 [Mycobacterium smegmatis str. MC2 155]                                         | 59 | 1  |
| gij118467403 | DNA topoisomerase I [Mycobacterium smegmatis str. MC2 155]                                | 59 | 13 |
| gij118472100 | glutamate transport ATP-binding protein GluA [Mycobacterium smegmatis str. MC2 155]       | 59 | 1  |
| gij118467521 | putative acyl-CoA dehydrogenase [Mycobacterium smegmatis str. MC2 155]                    | 58 | 3  |
| gij118468808 | hypothetical protein MSMEG_3645 [Mycobacterium smegmatis str. MC2 155]                    | 58 | 7  |
| gij118472088 | binding protein [Mycobacterium smegmatis str. MC2 155]                                    | 58 | 3  |
| gij118472003 | glutamyl-tRNA synthetase [Mycobacterium smegmatis str. MC2 155]                           | 57 | 6  |
| gij118471012 | methionine sulfoxide reductase A [Mycobacterium smegmatis str. MC2 155]                   | 57 | 1  |
| gij118467379 | riboflavin synthase subunit alpha [Mycobacterium smegmatis str. MC2 155]                  | 57 | 3  |
| gij118471450 | 50S ribosomal protein L13 [Mycobacterium smegmatis str. MC2 155]                          | 57 | 2  |

|              |                                                                                                                 |    |    |
|--------------|-----------------------------------------------------------------------------------------------------------------|----|----|
| gij118468280 | hypothetical protein MSMEG_3935 [Mycobacterium smegmatis str. MC2 155]                                          | 56 | 8  |
| gij118472528 | CAIB/BAIF family protein [Mycobacterium smegmatis str. MC2 155]                                                 | 56 | 4  |
| gij118473994 | CTP synthetase [Mycobacterium smegmatis str. MC2 155]                                                           | 56 | 4  |
| gij118469122 | RNA polymerase sigma factor [Mycobacterium smegmatis str. MC2 155]                                              | 55 | 3  |
| gij118469694 | hypothetical protein MSMEG_3081 [Mycobacterium smegmatis str. MC2 155]                                          | 55 | 6  |
| gij118469496 | fatty acid desaturase [Mycobacterium smegmatis str. MC2 155]                                                    | 54 | 7  |
| gij118467831 | putative ABC transporter ATP-binding protein [Mycobacterium smegmatis str. MC2 155]                             | 54 | 13 |
| gij118469773 | transaldolase [Mycobacterium smegmatis str. MC2 155]                                                            | 53 | 5  |
| gij118472491 | DoxX subfamily protein, putative [Mycobacterium smegmatis str. MC2 155]                                         | 53 | 9  |
| gij118470807 | bifunctional GMP synthase/glutamine amidotransferase protein [Mycobacterium smegmatis str. MC2 155]             | 53 | 14 |
| gij118473018 | integral membrane protein [Mycobacterium smegmatis str. MC2 155]                                                | 53 | 2  |
| gij118467601 | hypothetical protein MSMEG_1513 [Mycobacterium smegmatis str. MC2 155]                                          | 52 | 3  |
| gij118471877 | hypothetical protein MSMEG_1733 [Mycobacterium smegmatis str. MC2 155]                                          | 52 | 5  |
| gij118470811 | thioesterase family protein [Mycobacterium smegmatis str. MC2 155]                                              | 52 | 3  |
| gij118472053 | 30S ribosomal protein S7 [Mycobacterium smegmatis str. MC2 155]                                                 | 52 | 6  |
| gij118468458 | precorrin-8X methylmutase [Mycobacterium smegmatis str. MC2 155]                                                | 52 | 4  |
| gij118469642 | short chain dehydrogenase [Mycobacterium smegmatis str. MC2 155]                                                | 51 | 4  |
| gij118467631 | cell division protein FtsZ [Mycobacterium smegmatis str. MC2 155]                                               | 51 | 6  |
| gij118473000 | tena/thi-4 family protein [Mycobacterium smegmatis str. MC2 155]                                                | 51 | 3  |
| gij118469940 | putative integral membrane protein [Mycobacterium smegmatis str. MC2 155]                                       | 50 | 2  |
| gij118472270 | prolyl-tRNA synthetase [Mycobacterium smegmatis str. MC2 155]                                                   | 50 | 1  |
| gij118467578 | deoxyuridine 5--triphosphate nucleotidohydrolase [Mycobacterium smegmatis str. MC2 155]                         | 50 | 2  |
| gij118473939 | TetR-family protein transcriptional regulator [Mycobacterium smegmatis str. MC2 155]                            | 50 | 1  |
| gij118472779 | phosphoribose diphosphate:decaprenyl-phosphate phosphoribosyltransferase [Mycobacterium smegmatis str. MC2 155] | 50 | 2  |
| gij118471448 | <b>solute-binding lipoprotein [Mycobacterium smegmatis str. MC2 155]</b>                                        | 50 | 6  |
| gij118468351 | hypothetical protein MSMEG_0824 [Mycobacterium smegmatis str. MC2 155]                                          | 50 | 3  |
| gij118467542 | transcription antitermination protein NusG [Mycobacterium smegmatis str. MC2 155]                               | 50 | 3  |
| gij118467916 | ferredoxin-dependent glutamate synthase 1 [Mycobacterium smegmatis str. MC2 155]                                | 49 | 8  |
| gij118469964 | DNA polymerase III subunits gamma and tau [Mycobacterium smegmatis str. MC2 155]                                | 49 | 5  |
| gij118470482 | RNA polymerase sigma factor SigF [Mycobacterium smegmatis str. MC2 155]                                         | 49 | 4  |
| gij118473627 | phosphatidylserine decarboxylase [Mycobacterium smegmatis str. MC2 155]                                         | 49 | 1  |
| gij118471491 | ParB-like partition proteins [Mycobacterium smegmatis str. MC2 155]                                             | 49 | 4  |
| gij118469073 | 16S rRNA-processing protein [Mycobacterium smegmatis str. MC2 155]                                              | 47 | 3  |
| gij118469044 | hypothetical protein MSMEG_1279 [Mycobacterium smegmatis str. MC2 155]                                          | 47 | 6  |
| gij118471351 | phosphoribosylaminoimidazole-succinocarboxamide synthase [Mycobacterium smegmatis str. MC2 155]                 | 47 | 4  |
| gij118473653 | hydrogenase-2, small subunit [Mycobacterium smegmatis str. MC2 155]                                             | 47 | 3  |
| gij118472473 | membrane protein, MmpL family protein [Mycobacterium smegmatis str. MC2 155]                                    | 46 | 9  |
| gij118469590 | NHL repeat-containing protein [Mycobacterium smegmatis str. MC2 155]                                            | 46 | 9  |
| gij118469252 | carnitiny-CoA dehydratase [Mycobacterium smegmatis str. MC2 155]                                                | 46 | 3  |
| gij118470342 | integral membrane protein [Mycobacterium smegmatis str. MC2 155]                                                | 46 | 3  |
| gij118473811 | cell division ATP-binding protein FtsE [Mycobacterium smegmatis str. MC2 155]                                   | 46 | 7  |

|              |                                                                                                                                  |    |    |
|--------------|----------------------------------------------------------------------------------------------------------------------------------|----|----|
| gij118472583 | cytochrome c oxidase, subunit I [Mycobacterium smegmatis str. MC2 155]                                                           | 46 | 3  |
| gij118473307 | hypothetical protein MSMEG_4909 [Mycobacterium smegmatis str. MC2 155]                                                           | 45 | 3  |
| gij118470672 | acyl-CoA synthetase [Mycobacterium smegmatis str. MC2 155]                                                                       | 45 | 4  |
| gij118471289 | bifunctional phosphoribosylaminoimidazolecarboxamide formyltransferase/IMP cyclohydrolase [Mycobacterium smegmatis str. MC2 155] | 45 | 3  |
| gij118471527 | acyl carrier protein [Mycobacterium smegmatis str. MC2 155]                                                                      | 45 | 4  |
| gij118472995 | isoleucyl-tRNA synthetase [Mycobacterium smegmatis str. MC2 155]                                                                 | 44 | 4  |
| gij118468679 | mannose-binding lectin [Mycobacterium smegmatis str. MC2 155]                                                                    | 44 | 1  |
| gij118472921 | acetolactate synthase 1 catalytic subunit [Mycobacterium smegmatis str. MC2 155]                                                 | 44 | 4  |
| gij118472450 | extracellular solute-binding protein, family protein 3 [Mycobacterium smegmatis str. MC2 155]                                    | 44 | 3  |
| gij118467584 | cystathionine gamma-synthase [Mycobacterium smegmatis str. MC2 155]                                                              | 43 | 5  |
| gij118467923 | thiopurine S-methyltransferase (tpmt) superfamily protein [Mycobacterium smegmatis str. MC2 155]                                 | 43 | 1  |
| gij118471704 | catalase/peroxidase HPI [Mycobacterium smegmatis str. MC2 155]                                                                   | 43 | 3  |
| gij118469222 | glycerate kinase [Mycobacterium smegmatis str. MC2 155]                                                                          | 42 | 4  |
| gij118470303 | hypothetical protein MSMEG_1951 [Mycobacterium smegmatis str. MC2 155]                                                           | 42 | 8  |
| gij118470039 | chaperone ClpB [Mycobacterium smegmatis str. MC2 155]                                                                            | 42 | 8  |
| gij118469355 | dihydroxyacetone kinase, DhaK subunit [Mycobacterium smegmatis str. MC2 155]                                                     | 42 | 4  |
| gij118470653 | adenosine kinase [Mycobacterium smegmatis str. MC2 155]                                                                          | 42 | 4  |
| gij118467576 | para-aminobenzoate synthase component II [Mycobacterium smegmatis str. MC2 155]                                                  | 41 | 1  |
| gij118472922 | oligopeptide transport ATP-binding protein OppD [Mycobacterium smegmatis str. MC2 155]                                           | 41 | 2  |
| gij118470965 | UDP-galactopyranose mutase [Mycobacterium smegmatis str. MC2 155]                                                                | 41 | 5  |
| gij118468117 | DNA polymerase III subunit beta [Mycobacterium smegmatis str. MC2 155]                                                           | 40 | 5  |
| gij118469719 | alanine and proline-rich secreted protein apa [Mycobacterium smegmatis str. MC2 155]                                             | 40 | 6  |
| gij118467614 | alcohol dehydrogenase [Mycobacterium smegmatis str. MC2 155]                                                                     | 40 | 1  |
| gij118468825 | short chain dehydrogenase [Mycobacterium smegmatis str. MC2 155]                                                                 | 40 | 3  |
| gij118467529 | 1-aminocyclopropane-1-carboxylate deaminase [Mycobacterium smegmatis str. MC2 155]                                               | 40 | 3  |
| gij118468205 | O-succinylhomoserine sulphydrylase [Mycobacterium smegmatis str. MC2 155]                                                        | 40 | 5  |
| gij118472323 | ATPase, AAA family protein [Mycobacterium smegmatis str. MC2 155]                                                                | 39 | 12 |
| gij118472145 | intracellular protease, Pfpl family protein [Mycobacterium smegmatis str. MC2 155]                                               | 39 | 4  |
| gij118470195 | hypothetical protein MSMEG_0905 [Mycobacterium smegmatis str. MC2 155]                                                           | 39 | 5  |
| gij118470981 | 6-phosphogluconolactonase [Mycobacterium smegmatis str. MC2 155]                                                                 | 39 | 2  |
| gij118472006 | regulatory protein, TetR [Mycobacterium smegmatis str. MC2 155]                                                                  | 39 | 2  |
| gij118471653 | carbon-nitrogen hydrolase family protein [Mycobacterium smegmatis str. MC2 155]                                                  | 39 | 1  |
| gij118471755 | isochorismatase hydrolase [Mycobacterium smegmatis str. MC2 155]                                                                 | 39 | 3  |
| gij118470420 | MmpL4 protein [Mycobacterium smegmatis str. MC2 155]                                                                             | 38 | 4  |
| gij118472114 | hypothetical protein MSMEG_2458 [Mycobacterium smegmatis str. MC2 155]                                                           | 37 | 1  |
| gij118472346 | ABC transporter, permease/ATP-binding protein [Mycobacterium smegmatis str. MC2 155]                                             | 37 | 6  |
| gij118471443 | aspartate kinase [Mycobacterium smegmatis str. MC2 155]                                                                          | 37 | 7  |
| gij118469839 | DNA polymerase III subunit alpha [Mycobacterium smegmatis str. MC2 155]                                                          | 37 | 12 |
| gij118469707 | ABC transporter, permease/ATP-binding protein [Mycobacterium smegmatis str. MC2 155]                                             | 37 | 4  |
| gij118467505 | hypothetical protein MSMEG_5452 [Mycobacterium smegmatis str. MC2 155]                                                           | 37 | 3  |
| gij118473361 | hypothetical protein MSMEG_6415 [Mycobacterium smegmatis str. MC2 155]                                                           | 36 | 2  |

|              |                                                                                                                          |    |    |
|--------------|--------------------------------------------------------------------------------------------------------------------------|----|----|
| gij118472166 | two component transcriptional regulatory protein devr [Mycobacterium smegmatis str. MC2 155]                             | 36 | 7  |
| gij118471546 | signal transduction histidine kinase [Mycobacterium smegmatis str. MC2 155]                                              | 35 | 3  |
| gij118468268 | enoyl-CoA hydratase [Mycobacterium smegmatis str. MC2 155]                                                               | 35 | 2  |
| gij118468799 | Mmcl protein [Mycobacterium smegmatis str. MC2 155]                                                                      | 35 | 4  |
| gij118470350 | ABC transporter, ATP-binding protein [Mycobacterium smegmatis str. MC2 155]                                              | 35 | 2  |
| gij118468647 | inv protein [Mycobacterium smegmatis str. MC2 155]                                                                       | 35 | 1  |
| gij118469291 | LysR-family protein transcriptional regulator [Mycobacterium smegmatis str. MC2 155]                                     | 35 | 10 |
| gij118468485 | bifunctional ornithine acetyltransferase/N-acetylglutamate synthase protein [Mycobacterium smegmatis str. MC2 155]       | 35 | 3  |
| gij118468754 | 3-hydroxyacyl-CoA dehydrogenase type-2 [Mycobacterium smegmatis str. MC2 155]                                            | 35 | 6  |
| gij118471479 | acetaldehyde dehydrogenase [Mycobacterium smegmatis str. MC2 155]                                                        | 34 | 3  |
| gij118472374 | hypothetical protein MSMEG_3909 [Mycobacterium smegmatis str. MC2 155]                                                   | 34 | 5  |
| gij118473156 | allophanate hydrolase subunit 2 [Mycobacterium smegmatis str. MC2 155]                                                   | 34 | 1  |
| gij118468354 | cyclopropane-fatty-acyl-phospholipid synthase 1 [Mycobacterium smegmatis str. MC2 155]                                   | 34 | 2  |
| gij118468484 | thymidylate kinase [Mycobacterium smegmatis str. MC2 155]                                                                | 34 | 4  |
| gij118473504 | RNA pseudouridine synthase family protein [Mycobacterium smegmatis str. MC2 155]                                         | 34 | 5  |
| gij118473981 | tRNA-dihydrouridine synthase, putative [Mycobacterium smegmatis str. MC2 155]                                            | 33 | 2  |
| gij118471722 | 3-ketoacyl-(acyl-carrier-protein) reductase [Mycobacterium smegmatis str. MC2 155]                                       | 33 | 3  |
| gij118467725 | adenosine deaminase [Mycobacterium smegmatis str. MC2 155]                                                               | 33 | 9  |
| gij118473962 | enoyl-CoA hydratase [Mycobacterium smegmatis str. MC2 155]                                                               | 32 | 3  |
| gij118470915 | [NADP+] succinate-semialdehyde dehydrogenase [Mycobacterium smegmatis str. MC2 155]                                      | 32 | 6  |
| gij118473304 | GTP-binding protein TypA/BipA [Mycobacterium smegmatis str. MC2 155]                                                     | 32 | 3  |
| gij118473851 | <b>lipoprotein Lpps [Mycobacterium smegmatis str. MC2 155]</b>                                                           | 32 | 5  |
| gij118472696 | valyl-tRNA synthetase [Mycobacterium smegmatis str. MC2 155]                                                             | 32 | 12 |
| gij118469451 | hypothetical protein MSMEG_2198 [Mycobacterium smegmatis str. MC2 155]                                                   | 32 | 5  |
| gij118470693 | Formyl transferase [Mycobacterium smegmatis str. MC2 155]                                                                | 32 | 3  |
| gij118473949 | transcriptional regulatory protein [Mycobacterium smegmatis str. MC2 155]                                                | 32 | 5  |
| gij118468070 | hypothetical protein MSMEG_5309 [Mycobacterium smegmatis str. MC2 155]                                                   | 32 | 1  |
| gij118468685 | <b>lipoprotein [Mycobacterium smegmatis str. MC2 155]</b>                                                                | 32 | 5  |
| gij118473586 | transcriptional regulator, GntR family protein [Mycobacterium smegmatis str. MC2 155]                                    | 32 | 6  |
| gij118473076 | 2-oxoglutarate ferredoxin oxidoreductase subunit beta [Mycobacterium smegmatis str. MC2 155]                             | 31 | 2  |
| gij118472760 | inorganic pyrophosphatase [Mycobacterium smegmatis str. MC2 155]                                                         | 31 | 2  |
| gij118473813 | ABC transporter, permease protein SugB [Mycobacterium smegmatis str. MC2 155]                                            | 31 | 4  |
| gij118469041 | enoyl-CoA hydratase [Mycobacterium smegmatis str. MC2 155]                                                               | 31 | 7  |
| gij118473031 | diguanylate cyclase [Mycobacterium smegmatis str. MC2 155]                                                               | 31 | 2  |
| gij118471079 | transcriptional regulator, TetR family protein [Mycobacterium smegmatis str. MC2 155]                                    | 31 | 3  |
| gij118473179 | homoserine dehydrogenase [Mycobacterium smegmatis str. MC2 155]                                                          | 30 | 5  |
| gij118470332 | glyoxalase family protein [Mycobacterium smegmatis str. MC2 155]                                                         | 30 | 2  |
| gij118468884 | transcriptional regulator, TetR family protein [Mycobacterium smegmatis str. MC2 155]                                    | 30 | 3  |
| gij118470254 | glutamine-binding periplasmic protein/glutamine transport system permease protein [Mycobacterium smegmatis str. MC2 155] | 30 | 5  |
| gij118467865 | ribonuclease PH [Mycobacterium smegmatis str. MC2 155]                                                                   | 30 | 1  |
| gij118473375 | hypothetical protein MSMEG_0317 [Mycobacterium smegmatis str. MC2 155]                                                   | 30 | 3  |

|              |                                                                                                                     |    |    |
|--------------|---------------------------------------------------------------------------------------------------------------------|----|----|
| gij118469867 | 4-hydroxy-2-ketovalerate aldolase [Mycobacterium smegmatis str. MC2 155]                                            | 30 | 2  |
| gij118474039 | maleylacetate reductase [Mycobacterium smegmatis str. MC2 155]                                                      | 29 | 10 |
| gij118470931 | metallo-beta-lactamase family protein [Mycobacterium smegmatis str. MC2 155]                                        | 29 | 2  |
| gij118472981 | extracellular solute-binding protein, family protein 5 [Mycobacterium smegmatis str. MC2 155]                       | 29 | 7  |
| gij118470031 | 1-(5-phosphoribosyl)-5-[(5-phosphoribosylamino)methylideneamino] imidazole-4-carboxamide isomerase [Mycobacterium s | 29 | 5  |
| gij118470803 | extra cytoplasmic sigma factor [Mycobacterium smegmatis str. MC2 155]                                               | 29 | 2  |
| gij118468236 | 4-hydroxy-3-methylbut-2-en-1-yl diphosphate synthase [Mycobacterium smegmatis str. MC2 155]                         | 29 | 9  |
| gij118467974 | FeS assembly protein SufD [Mycobacterium smegmatis str. MC2 155]                                                    | 29 | 4  |
| gij118468834 | acyl-CoA synthetase [Mycobacterium smegmatis str. MC2 155]                                                          | 29 | 3  |
| gij118472496 | branched-chain amino acid aminotransferase [Mycobacterium smegmatis str. MC2 155]                                   | 29 | 1  |
| gij118467579 | amino acid carrier protein [Mycobacterium smegmatis str. MC2 155]                                                   | 29 | 3  |
| gij118470718 | hypothetical protein MSMEG_6447 [Mycobacterium smegmatis str. MC2 155]                                              | 29 | 2  |
| gij118468925 | hypothetical protein MSMEG_3682 [Mycobacterium smegmatis str. MC2 155]                                              | 29 | 1  |
| gij118471246 | respiratory nitrate reductase, gamma subunit [Mycobacterium smegmatis str. MC2 155]                                 | 29 | 3  |
| gij118471350 | ferrochelataase [Mycobacterium smegmatis str. MC2 155]                                                              | 28 | 7  |
| gij118473515 | amylo-alpha-1,6-glucohydrolase [Mycobacterium smegmatis str. MC2 155]                                               | 28 | 6  |
| gij118471817 | hypothetical protein MSMEG_4820 [Mycobacterium smegmatis str. MC2 155]                                              | 28 | 2  |
| gij118470314 | NAD-dependent DNA ligase LigA [Mycobacterium smegmatis str. MC2 155]                                                | 28 | 6  |
| gij118468633 | carbon starvation protein A [Mycobacterium smegmatis str. MC2 155]                                                  | 28 | 9  |
| gij118471548 | amino-acid acetyltransferase [Mycobacterium smegmatis str. MC2 155]                                                 | 28 | 3  |
| gij118473677 | rhamnulokinase [Mycobacterium smegmatis str. MC2 155]                                                               | 28 | 2  |
| gij118467440 | sensory box/response regulator [Mycobacterium smegmatis str. MC2 155]                                               | 28 | 5  |
| gij118470602 | linear gramicidin synthetase subunit B [Mycobacterium smegmatis str. MC2 155]                                       | 28 | 21 |
| gij118469030 | penicillin binding protein transpeptidase domain-containing protein [Mycobacterium smegmatis str. MC2 155]          | 27 | 3  |
| gij118468182 | extracellular solute-binding protein, family protein 5 [Mycobacterium smegmatis str. MC2 155]                       | 27 | 5  |
| gij118473807 | putative 3-hydroxyacyl-CoA dehydrogenase [Mycobacterium smegmatis str. MC2 155]                                     | 26 | 6  |
| gij118468051 | proteasome beta subunit [Mycobacterium smegmatis str. MC2 155]                                                      | 26 | 2  |
| gij118471631 | alkanesulfonate monooxygenase family protein [Mycobacterium smegmatis str. MC2 155]                                 | 26 | 1  |
| gij118470922 | hypothetical protein MSMEG_0222 [Mycobacterium smegmatis str. MC2 155]                                              | 26 | 3  |
| gij118468699 | SseC protein [Mycobacterium smegmatis str. MC2 155]                                                                 | 26 | 3  |
| gij118473601 | dihydroorotase [Mycobacterium smegmatis str. MC2 155]                                                               | 26 | 5  |
| gij118473505 | preprotein translocase subunit SecY [Mycobacterium smegmatis str. MC2 155]                                          | 25 | 1  |
| gij118469828 | DEAD/DEAH box helicase [Mycobacterium smegmatis str. MC2 155]                                                       | 25 | 12 |
| gij118472188 | hypothetical protein MSMEG_3278 [Mycobacterium smegmatis str. MC2 155]                                              | 25 | 3  |
| gij118473814 | hydrolase [Mycobacterium smegmatis str. MC2 155]                                                                    | 25 | 4  |
